# Supplementary material for: Physical activity and risk of breast cancer, colon cancer, diabetes, ischemic heart disease, and ischemic stroke events: systematic review and dose-response meta-analysis for the Global Burden of Disease Study 2013
Source: PubMed Central journal article supplement (PMC4979358; doi:10.1136/bmj.i3857), 2016-08-09
Supplement: kyuh031211.ww2_default.pdf [file kyuh031211.ww2_default.pdf]

## Appendix 2: Search strategies [posted as supplied by author]

| EMBASE                 | Search strategies                                                                                                                                                                              |
|------------------------|------------------------------------------------------------------------------------------------------------------------------------------------------------------------------------------------|
| Breast cancer          | 'physical activity':ab,ti AND 'breast cancer':ab,ti AND ([article]/lim OR [article in press]/lim) AND [humans]/lim AND [english]/lim AND [embase]/lim NOT [28-2-2016]/sd AND [1980-2016]/py    |
| Breast cancer          | 'physical activity':ab,ti AND 'breast carcinoma':ab,ti AND ([article]/lim OR [article in press]/lim) AND [humans]/lim AND [english]/lim AND [embase]/lim NOT [28-2-2016]/sd AND [1980-2016]/py |
| Breast cancer          | 'physical activity':ab,ti AND 'breast neoplasm':ab,ti AND ([article]/lim OR [article in press]/lim) AND [humans]/lim AND [english]/lim AND [embase]/lim NOT [28-2-2016]/sd AND [1980-2016]/py  |
| Breast cancer          | 'physical activity':ab,ti AND 'breast tumor':ab,ti AND ([article]/lim OR [article in press]/lim) AND [humans]/lim AND [english]/lim AND [embase]/lim NOT [28-2-2016]/sd AND [1980-2016]/py     |
| Colon cancer           | 'physical activity':ab,ti AND 'colon cancer':ab,ti AND [humans]/lim AND [english]/lim AND [embase]/lim NOT [28-2-2016]/sd AND [1980-2016]/py                                                   |
| Colon cancer           | 'physical activity':ab,ti AND 'colon carcinoma':ab,ti AND [humans]/lim AND [english]/lim AND [embase]/lim NOT [28-2-2016]/sd AND [1980-2016]/py                                                |
| Colon cancer           | 'physical activity':ab,ti AND 'colon neoplasm':ab,ti AND [humans]/lim AND [english]/lim AND [embase]/lim NOT [28-2-2016]/sd AND [1980-2016]/py                                                 |
| Colon cancer           | 'physical activity':ab,ti AND 'colon tumor':ab,ti AND [humans]/lim AND [english]/lim AND [embase]/lim NOT [28-2-2016]/sd AND [1980-2016]/py                                                    |
| Diabetes               | 'physical activity':ab,ti AND 'type 2 diabetes':ab,ti AND [1980-2016]/py AND ([article]/lim OR [article in press]/lim) AND [humans]/lim AND [english]/lim AND [embase]/lim NOT [28-2-2016]/sd  |
| Diabetes               | 'physical activity':ab,ti AND 'noninsulin dependent diabetes mellitus':ab,ti AND [humans]/lim AND [english]/lim AND [embase]/lim NOT [28-2-2016]/sd AND [1980-2016]/py                         |
| Diabetes               | 'physical activity':ab,ti AND 'niddm':ab,ti AND [humans]/lim AND [english]/lim AND [embase]/lim NOT [28-2-2016]/sd AND [1980-2016]/py                                                          |
| Ischemic heart disease | 'physical activity':ab,ti AND 'ischemic heart disease':ab,ti AND [humans]/lim AND [english]/lim AND [embase]/lim NOT [28-2-2016]/sd AND [1980-2016]/py                                         |
| Ischemic heart disease | 'physical activity':ab,ti AND 'ischaemic heart disease':ab,ti AND [humans]/lim AND [english]/lim AND [embase]/lim NOT [28-2-2016]/sd AND [1980-2016]/py                                        |
| Ischemic heart disease | 'physical activity':ab,ti AND 'coronary heart disease':ab,ti AND [humans]/lim AND [english]/lim AND [embase]/lim NOT [28-2-2016]/sd AND [1980-2016]/py                                         |
| Ischemic stroke        | 'physical activity':ab,ti AND 'ischemic stroke':ab,ti AND [humans]/lim                                                                                                                         |

|                        |                                                                                                                                                                                        |
|------------------------|----------------------------------------------------------------------------------------------------------------------------------------------------------------------------------------|
|                        | AND [english]/lim AND [embase]/lim NOT [28-2-2016]/sd AND [1980-2016]/py                                                                                                               |
| Ischemic stroke        | 'physical activity':ab,ti AND 'ischaemic stroke':ab,ti AND [humans]/lim AND [english]/lim AND [embase]/lim NOT [28-2-2016]/sd AND [1980-2016]/py                                       |
| <b>PubMed</b>          |                                                                                                                                                                                        |
| Breast cancer          | physical activity[Title/Abstract] AND breast cancer [Title/Abstract] AND "humans"[MeSH Terms] AND English[lang] AND ("1980/01/01"[PDAT] : "2016/02/27"[PDAT])                          |
| Breast cancer          | physical activity[Title/Abstract] AND breast carcinoma [Title/Abstract] AND "humans"[MeSH Terms] AND English[lang] AND ("1980/01/01"[PDAT] : "2016/02/27"[PDAT])                       |
| Breast cancer          | physical activity[Title/Abstract] AND breast neoplasm [Title/Abstract] AND "humans"[MeSH Terms] AND English[lang] AND ("1980/01/01"[PDAT] : "2016/02/27"[PDAT])                        |
| Breast cancer          | physical activity[Title/Abstract] AND breast tumor [Title/Abstract] AND "humans"[MeSH Terms] AND English[lang] AND ("1980/01/01"[PDAT] : "2016/02/27"[PDAT])                           |
| Colon cancer           | physical activity[Title/Abstract] AND colon cancer [Title/Abstract] AND "humans"[MeSH Terms] AND English[lang] AND ("1980/01/01"[PDAT] : "2016/02/27"[PDAT])                           |
| Colon cancer           | physical activity[Title/Abstract] AND colon carcinoma [Title/Abstract] AND "humans"[MeSH Terms] AND English[lang] AND ("1980/01/01"[PDAT] : "2016/02/27"[PDAT])                        |
| Colon cancer           | physical activity[Title/Abstract] AND colon neoplasm [Title/Abstract] AND "humans"[MeSH Terms] AND English[lang] AND ("1980/01/01"[PDAT] : "2016/02/27"[PDAT])                         |
| Colon cancer           | physical activity[Title/Abstract] AND colon tumor [Title/Abstract] AND "humans"[MeSH Terms] AND English[lang] AND ("1980/01/01"[PDAT] : "2016/02/27"[PDAT])                            |
| Diabetes               | physical activity[Title/Abstract] AND type 2 diabetes[Title/Abstract] AND "humans"[MeSH Terms] AND English[lang] AND ("1980/01/01"[PDAT] : "2016/02/27"[PDAT])                         |
| Diabetes               | physical activity[Title/Abstract] AND noninsulin dependent diabetes mellitus [Title/Abstract] AND "humans"[MeSH Terms] AND English[lang] AND ("1980/01/01"[PDAT] : "2016/02/27"[PDAT]) |
| Diabetes               | physical activity[Title/Abstract] AND niddm[Title/Abstract] AND "humans"[MeSH Terms] AND English[lang] AND ("1980/01/01"[PDAT] : "2016/02/27"[PDAT])                                   |
| Ischemic heart disease | physical activity[Title/Abstract] AND ischemic heart disease [Title/Abstract] AND "humans"[MeSH Terms] AND English[lang] AND ("1980/01/01"[PDAT] : "2016/02/27"[PDAT])                 |
| Ischemic heart disease | physical activity[Title/Abstract] AND ischaemic heart disease [Title/Abstract] AND "humans"[MeSH Terms] AND English[lang] AND ("1980/01/01"[PDAT] : "2016/02/27"[PDAT])                |
| Ischemic heart         | physical activity[Title/Abstract] AND coronary heart disease                                                                                                                           |

|                 |                                                                                                                                                                 |
|-----------------|-----------------------------------------------------------------------------------------------------------------------------------------------------------------|
| disease         | [Title/Abstract] AND "humans"[MeSH Terms] AND English[lang] AND ("1980/01/01"[PDAT] : "2016/02/27"[PDAT])                                                       |
| Ischemic stroke | physical activity[Title/Abstract] AND ischemic stroke [Title/Abstract] AND "humans"[MeSH Terms] AND English[lang] AND ("1980/01/01"[PDAT] : "2016/02/27"[PDAT]) |
| Ischemic stroke | physical activity[Title/Abstract] AND ischaemic stroke[Title/Abstract] AND "humans"[MeSH Terms] AND English[lang] AND ("1980/01/01"[PDAT] : "2016/02/27"[PDAT]) |
