# Supplementary material for: Physical activity and risk of breast cancer, colon cancer, diabetes, ischemic heart disease, and ischemic stroke events: systematic review and dose-response meta-analysis for the Global Burden of Disease Study 2013
Source: PubMed Central journal article supplement (PMC4979358; doi:10.1136/bmj.i3857), 2016-08-09
Supplement: kyuh031211.ww3_default.pdf [file kyuh031211.ww3_default.pdf]

### Appendix 3: DisMod-MR 2.0 equations [posted as supplied by author]

We used a log-Gaussian likelihood function in a mixed-effects model as shown in the equation below:

$$-\log[p(y_j|\Phi)] = \log(\sqrt{2\pi}) + \log(\delta_j + s_j) + \frac{1}{2} \left( \frac{\log(a_j + \eta_j) - \log(m_j + \eta_j)}{\delta_j + s_j} \right)^2$$

where,  $y_j$  is a data point;  $\Phi$  denotes all model random variables;  $\eta_j$  is the offset value and  $a_j$  is the adjusted value for study-level covariates for data point  $j$ , defined by:

$$a_j = e^{(-u_j - c_j)} y_j$$

where  $u_j$  is the study random effects and  $c_j$  is the total covariate effect (i.e. the mean combined fixed effects for sex and study-level covariates), defined by:

$$c_j = \sum_{k=0}^{K[I(j)]-1} \beta_{I(j),k} \hat{X}_{k,j}$$

with standard deviation

$$s_j = \sum_{l=0}^{L[I(j)]-1} \zeta_{I(j),l} \hat{Z}_{l,j}$$

where  $k$  denotes the mean value of each data point in relation to a study-level covariate (also called x-covariate);  $I(j)$  denotes a data point  $j$ ;  $\beta_{I(j),k}$  is the multiplier of the  $k^{\text{th}}$  x-covariate;  $\hat{X}_{k,j}$  is the covariate value corresponding to the data point  $j$  for covariate  $k$ ;  $l$  denotes the standard deviation of each data point in relation to a covariate (also called z-covariate);  $\zeta_{I(j),k}$  is the multiplier of the  $l^{\text{th}}$  z-covariate; and  $\delta_j$  is the standard deviation for adjusted measurement  $j$  where  $m_j$  denotes the expected value for the  $j^{\text{th}}$  measurement, not counting effects or measurement noise and defined by:

$$m_j = \frac{1}{B(j)-A(j)} \int_{A(j)}^{B(j)} I_j(a) da$$

where  $A(j)$  is the lower bound of the MET-hour range for a data point;  $B(j)$  is the upper bound of the MET-hour range for a data point; and  $I_j$  denotes the function of MET-hour corresponding to the data point  $j$ . The basic settings of DisMod-MR 2.0 also estimates the parameter ‘zeta’ ( $\zeta$ ) that determines how much heterogeneity (non-sampling variation) between studies exists. An estimated value of zeta close to 0.5 indicates that there is substantial heterogeneity in the data.
