# Supplementary material for: Physical activity and risk of breast cancer, colon cancer, diabetes, ischemic heart disease, and ischemic stroke events: systematic review and dose-response meta-analysis for the Global Burden of Disease Study 2013
Source: PubMed Central journal article supplement (PMC4979358; doi:10.1136/bmj.i3857), 2016-08-09
Supplement: kyuh031211.ww4_2kb.pdf [file kyuh031211.ww4_2kb.pdf]

**Appendix 4:** Supplementary tables A-G [posted as supplied by author]

**Table A.** Characteristics and quality assessment of studies included in the meta-regression analysis for the association between physical activity and breast cancer

| Author (Year)  | Study Name                                                                       | Country       | Time Period                          | Age Range | Sex    | Sample Size | Activity Type        | Effect Type | Effect                                                                                                                    | Covariates adjusted                                                                                                                                                                                                                                   | NOS score |
|----------------|----------------------------------------------------------------------------------|---------------|--------------------------------------|-----------|--------|-------------|----------------------|-------------|---------------------------------------------------------------------------------------------------------------------------|-------------------------------------------------------------------------------------------------------------------------------------------------------------------------------------------------------------------------------------------------------|-----------|
| Bardia (2006)  | Iowa Women's Health Study                                                        | United States | 1986-2003                            | 55-69     | Female | 36363       | Recreation           | RR          | Low: 1.00; Medium: 1.04 (0.94, 1.14); High: 0.91 (0.82, 1.01)                                                             | Age, Education, Family History of Breast Cancer, Age at Menarche, Number of Live Births, Age at First Live Birth, Oral Contraceptive Use, Use of Hormone Therapy, Alcohol, Smoking, BMI at Baseline, BMI at Age 18                                    | 7         |
| Borch (2014)   | Norwegian Women and Cancer (NOWAC) study                                         | Norway        | 1991-2004. Mean follow up 8.2 years  | 34-70     | Female | 80202       | Total daily activity | RR          | Very Low: 1.06 (0.86, 1.30); Low: 1.05 (0.93, 1.19); Moderate: 1.00 High: 1.04 (0.92, 1.17); Very High: 0.91 (0.73, 1.12) | Height, BMI, Smoking Status, Smoking Duration (Pack Years), Age at Menarche, Use of Oral Contraceptives, Age at First Birth, Parity, Use of Hormone Replacement Therapy, Self-Reported Disease, History of Breast Cancer in the Participant's Mother. | 7         |
| Breslow (2001) | NHANES I cohort followed prospectively through the Epidemiologic follow-up study | United States | 1982-1992 Median follow up 9.2 years | 24-75     | Female | 6160        | Recreation           | RR          | Consistently Low: 1.00; Moderate/Inconsistent: 0.92 (0.62, 1.38); Consistently High: 0.58 (0.31, 1.07)                    | Height, BMI at Age 25, Adult Weight Change, Sample Design Variables                                                                                                                                                                                   | 7         |

| Author (Year)  | Study Name                                                             | Country       | Time Period                          | Age Range | Sex    | Sample Size | Activity Type         | Effect Type | Effect                                                                                                                                                                       | Covariates adjusted                                                                                                                                                                                               | NOS score |
|----------------|------------------------------------------------------------------------|---------------|--------------------------------------|-----------|--------|-------------|-----------------------|-------------|------------------------------------------------------------------------------------------------------------------------------------------------------------------------------|-------------------------------------------------------------------------------------------------------------------------------------------------------------------------------------------------------------------|-----------|
|                | (NHEFS)                                                                |               |                                      |           |        |             |                       |             |                                                                                                                                                                              |                                                                                                                                                                                                                   |           |
| Cerhan (1998)  | Iowa 65+ Rural Health Study                                            | United States | 1982-1993                            | 65-102    | Female | 1806        | Recreation+ Household | RR          | Inactive: 1.00; Moderate: 0.50 (0.20, 1.10); High: 0.30 (0.06, 1.10)                                                                                                         | Age, Education, BMI, Age at Menstruation, Age at Menopause, Use of Hormone replacement therapy, Systolic BP                                                                                                       | 7         |
| Chang (2006)   | Part of prostate, lung, colorectal, and ovarian cancer screening trial | United States | 1993-2003 Median follow-up 4.9 years | 55-74     | Female | 27541       | Recreation            | RR          | 0 hr/week: 1.00; <1 hr/week: 0.91 (0.70, 1.17); 1 hr/week: 0.98 (0.74, 1.28); 2 hr/week: 0.93 (0.72, 1.20); 3 hr/week: 1.06 (0.82, 1.36); ≥4 hr/week: 0.81 (0.63, 1.05)      | Center, Race, Height, Family History of Breast Cancer, History of Benign Breast Disease, Age at Menarche, Age at First Birth, Parity, Age at Menopause, Menopausal Hormone Therapy, Education, Energy Intake, BMI | 6         |
| Colditz (2003) | Nurses' Health Study II                                                | United States | 1989-1999                            | 25-42     | Female | 110468      | Recreation + walking  | RR          | <3 MET hr/week: 1.0; 3-8.9 MET hr/week: 1.05 (0.82, 1.33); 9-17.9 MET hr/week: 0.95 (0.74, 1.21); 18-26.9 MET hr/week: 1.03 (0.79, 1.35); ≥27 MET hr/week: 1.04 (0.82, 1.33) | Age, Height, Alcohol, Age At Menarche, Age At First Birth, Oral Contraceptive Use, History of Benign Breast Disease, Mother or Sister with Breast Cancer, BMI                                                     | 7         |
| Dallal (2007)  | California Teachers Study                                              | United States | 1995-2002 Mean follow-up 6.6 years   | 20-79     | Female | 110599      | Recreation            | RR          | Strenuous Activity: 0-0.5 hr/week: 1.00; 0.51-2.0 hr/week: 0.93 (0.85, 1.02); 2.01-3.50 hr/week: 0.88 (0.78, 0.99);                                                          | Race, Family History of Breast Cancer, Age at First Full-Term Pregnancy & Number Full-Term Pregnancies, Hormone                                                                                                   | 6         |

| Author (Year)   | Study Name             | Country       | Time Period | Age Range | Sex    | Sample Size | Activity Type        | Effect Type | Effect                                                                                                                                                                                                                                                                                | Covariates adjusted                                                                                                                                                  | NOS score |
|-----------------|------------------------|---------------|-------------|-----------|--------|-------------|----------------------|-------------|---------------------------------------------------------------------------------------------------------------------------------------------------------------------------------------------------------------------------------------------------------------------------------------|----------------------------------------------------------------------------------------------------------------------------------------------------------------------|-----------|
|                 |                        |               |             |           |        |             |                      |             | 3.51-5.0 hr/week: 1.02 (0.88, 1.18);<br>>5.0 hr/week: 0.80 (0.69, 0.94)<br><br>Moderate activity:<br>0-0.5 hr/week: 1.00;<br>0.51-2.0 hr/week: 1.02 (0.92, 1.13);<br>2.01-3.50 hr/week: 1.02 (0.91, 1.15);<br>3.51-5.0 hr/week: 0.99 (0.86, 1.14);<br>>5.0 hr/week: 0.94 (0.81, 1.08) | Replacement Therapy Use and Menopausal Status, BMI, Smoking, Alcohol, History of Breast Biopsy, Mammography Screening                                                |           |
| Dorgan (1994)   | Framingham Heart Study | United States | 1954-1984   | 35-68     | Female | 2307        | Total daily activity | RR          | Low (Physical Activity Index 25-28): 1.00;<br>Q2 (Physical Activity Index 29-30): 1.20 (0.70, 2.10);<br>Q3 (Physical Activity Index 31-32): 1.30 (0.70, 2.40);<br>High (Physical Activity Index 33-54): 1.60 (0.90, 2.90)                                                             | Age, Stratifying on Age at Baseline Examination, Number of Pregnancies, Menopausal Status, Age at First Pregnancy, Education, Occupation, Alcohol                    | 8         |
| Eliassen (2010) | Nurses' Health Study   | United States | 1986-2006   | 40-65     | Female | 95396       | Recreation + walking | RR          | <3 MET hr/week: 1.00;<br>3-<9 MET hr/week: 0.94 (0.86, 1.02);<br>9-<18 MET hr/week: 0.96 (0.88, 1.05);<br>18-<27 MET hr/week: 0.97                                                                                                                                                    | Age, age at Menarche, BMI, Height, Parity and Age at First Birth, Alcohol, Postmenopausal Hormone Use, Age at Menopause, Missing Age at Menopause, Family History of | 7         |

| Author (Year)     | Study Name                                  | Country       | Time Period                           | Age Range | Sex    | Sample Size | Activity Type | Effect Type | Effect                                                                                                                                                                         | Covariates adjusted                                                                                                                                                                                                                                                | NOS score |
|-------------------|---------------------------------------------|---------------|---------------------------------------|-----------|--------|-------------|---------------|-------------|--------------------------------------------------------------------------------------------------------------------------------------------------------------------------------|--------------------------------------------------------------------------------------------------------------------------------------------------------------------------------------------------------------------------------------------------------------------|-----------|
|                   |                                             |               |                                       |           |        |             |               |             | (0.87, 1.08);<br>≥27 MET hr/week:<br>0.91 (0.83, 1.01)                                                                                                                         | Breast Cancer,<br>History Benign<br>Breast Disease                                                                                                                                                                                                                 |           |
| Frisch (1987)     | Former college athletes                     | United States | 1925-1981                             | 22-78     | Female | 5398        | Recreation    | RR          | Inactive: 1.86 (1.00, 3.47);<br>Active: 1.00                                                                                                                                   | Age, Number of Pregnancies, Family History of Cancer, Leanness, Age at Menarche, Smoking, Use of Oral Contraceptives, Use of Hormones for Menopause Symptoms                                                                                                       | 4         |
| Hastert (2013)    | Vitamins and Lifestyle (VITAL) study cohort | United States | 2000-2008<br>Mean follow up 6.7 years | 50-76     | Female | 30797       | Recreation    | HR          | Did Not Meet Recommendation (<150 Minutes/Week): 1.0 Met;<br>Recommendation (≥150 Minutes/Week): 0.97 (0.81, 1.16)                                                             | Age, Education, Race, Mammography, Family History of Breast Cancer, Age at Menarche, Age at First Birth, Age at Menopause, Years of Estrogen plus Progestin Hormone Therapy Use, Daily Energy Intake, Body Fatness, Energy Density, Plant Foods, Red Meat, Alcohol | 7         |
| Hildebrand (2013) | CPS-II Nutrition Cohort                     | United States | 1992-2009                             | 50-74     | Female | 73615       | Recreation    | RR          | None: 0.91 (0.81, 1.02);<br>> 0 - 7.0 MET hr/week: 1.00;<br>> 7.0 - 17.5 MET hr/week: 0.97 (0.90, 1.04);<br>> 17.5 - 31.5 MET hr/week: 0.99 (0.92, 1.08);<br>> 31.5 - 42.0 MET | Age, Race, Education, BMI, Weight Change, Alcohol Use, Smoking Status, Menopausal Hormone Use, Number of Live Births, Age at First Live Birth, Age at Menopause, Family                                                                                            | 7         |

| Author (Year)    | Study Name                            | Country       | Time Period                                     | Age Range | Sex    | Sample Size | Activity Type                       | Effect Type | Effect                                                                                                                                                                                                                | Covariates adjusted                                                                                                                                                                                                                                      | NOS score |
|------------------|---------------------------------------|---------------|-------------------------------------------------|-----------|--------|-------------|-------------------------------------|-------------|-----------------------------------------------------------------------------------------------------------------------------------------------------------------------------------------------------------------------|----------------------------------------------------------------------------------------------------------------------------------------------------------------------------------------------------------------------------------------------------------|-----------|
|                  |                                       |               |                                                 |           |        |             |                                     |             | hr/week: 0.94 (0.82, 1.08);<br>> 42.0 MET<br>hr/week: 0.75 (0.63, 0.89)                                                                                                                                               | History of Breast Cancer, Breast Cysts, Hysterectomy, Oophorectomy, Mammogram within Last Year.                                                                                                                                                          |           |
| Howard (2009)    | US Radiologic Technologists cohort    | United States | 1994-2005<br>Mean length of follow up 8.9 years | 20-99     | Female | 45631       | Recreation + walking                | HR          | 0.0-9.5 MET<br>hr/week: 1.00; 11.5-23.0 MET<br>hr/week: 1.02 (0.83, 1.26);<br>23.5-45.5 MET<br>hr/week: 1.02 (0.83, 1.25);<br>46.0-96.5 MET<br>hr/week: 0.87 (0.70, 1.08);<br>≥97.0 MET<br>hr/week: 0.91 (0.74, 1.13) | Age, BMI, Age at Menarche, Parity, Age at First Birth, Age at Menopause, Family History of Breast Cancer, Personal History of Breast Disease, Oral Contraceptive Use, Menopausal Hormone Therapy, Race, Smoking, Alcohol                                 | 6         |
| Lee (2001)       | Women's Health Study (United States)  | United States | 1992-1998.<br>Mean follow-up 48 months          | 45+       | Female | 39322       | Recreation                          | RR          | <840 kJ/week: 1.00;<br>840-2519 kJ/week: 1.04 (0.77, 1.40);<br>2520-6299 kJ/week: 0.86 (0.64, 1.17);<br>≥6300 kJ/week: 0.80 (0.58, 1.12)                                                                              | Age, Treatment Group, BMI, Alcohol, Age at Menarche, Age at First Pregnancy Lasting ≥6 Months, Number of Pregnancies Lasting ≥6 Months, Menopausal Status, Ever Use of Oral Contraceptives, Use of Postmenopausal Hormones, Family History Breast Cancer | 6         |
| Leitzmann (2008) | Breast Cancer Detection Demonstration | United States | 1987-1998                                       | 40-93     | Female | 32269       | Recreation+ Household+ Occupational | RR          | 105-244 MET<br>hr/week: 1.00;<br>245-297 MET<br>hr/week: 0.93                                                                                                                                                         | Age at Baseline, Family History of Breast Cancer, History of Benign                                                                                                                                                                                      | 7         |

| Author (Year)   | Study Name                            | Country        | Time Period                         | Age Range | Sex    | Sample Size | Activity Type        | Effect Type | Effect                                                                                                                                                       | Covariates adjusted                                                                                                                                                                                                                                                             | NOS score |
|-----------------|---------------------------------------|----------------|-------------------------------------|-----------|--------|-------------|----------------------|-------------|--------------------------------------------------------------------------------------------------------------------------------------------------------------|---------------------------------------------------------------------------------------------------------------------------------------------------------------------------------------------------------------------------------------------------------------------------------|-----------|
|                 | tion Project Follow-up Study          |                |                                     |           |        |             |                      |             | (0.80, 1.09);<br>298-339 MET<br>hr/week: 0.98<br>(0.84, 1.14);<br>340-394 MET<br>hr/week: 1 (0.85,<br>1.16);<br>395-721 MET<br>hr/week: 0.87<br>(0.74, 1.02) | Breast Disease,<br>Breast Cancer<br>Screening History,<br>Height, Age at<br>Menarche, Age at<br>Menopause, Age at<br>First Live Birth,<br>History of Oral<br>Contraceptive Use,<br>Menopausal<br>Hormone Therapy,<br>Education, Smoking,<br>Dietary Fat Intake,<br>Alcohol, BMI |           |
| Luoto (2000)    | Finnish adult health behaviour survey | Finland        | 1978-1995                           | 15-64     | Female | 30548       | Recreation           | RR          | <Once/Week: 1.00;<br>Once/Week: 0.80<br>(0.58, 1.10); 2-3<br>Times/Week: 0.92<br>(0.78, 1.22);<br>Daily: 1.01 (0.72,<br>1.42)                                | Age, Length of<br>Follow-Up,<br>Education, BMI,<br>Parity, Age At First<br>Birth                                                                                                                                                                                                | 6         |
| Margolis (2005) | Women's Lifestyle and Health Study    | Norway, Sweden | 1991-2003, Mean follow up 9.1 years | 30-49     | Female | 99504       | Recreation           | RR          | None: 1.00;<br>Low: 1.35 (0.96,<br>1.90);<br>Moderate: 1.26<br>(0.91, 1.74);<br>High: 1.19 (0.85,<br>1.67);<br>Vigorous: 1.24<br>(0.85, 1.82)                | Age, Education,<br>BMI, Height,<br>Smoking, Alcohol,<br>Age at Menarche,<br>Parity, Age at First<br>Birth, Number of<br>Months Breast<br>Feeding, Oral<br>Contraceptive Use,<br>Family History of<br>Breast Cancer,<br>Menopausal Status,<br>Country of Origin                  | 7         |
| Maruti (2008)   | Nurses' Health Study II               | United States  | 1997-2003                           | 33-51     | Female | 64777       | Recreation + walking | RR          | <21.0 MET<br>hr/week: 1.00;<br>21.0-29.9 MET<br>hr/week: 0.98                                                                                                | Age, Average<br>Childhood Body<br>Shape, Oral<br>Contraceptive Use,                                                                                                                                                                                                             | 6         |



| Author (Year) | Study Name                                 | Country       | Time Period                           | Age Range | Sex    | Sample Size | Activity Type                          | Effect Type | Effect                                                                                                                                                                      | Covariates adjusted                                                                                                                                                           | NOS score |
|---------------|--------------------------------------------|---------------|---------------------------------------|-----------|--------|-------------|----------------------------------------|-------------|-----------------------------------------------------------------------------------------------------------------------------------------------------------------------------|-------------------------------------------------------------------------------------------------------------------------------------------------------------------------------|-----------|
|               |                                            |               |                                       |           |        |             |                                        |             | (3.00-5.00): 0.87 (0.61, 1.24)                                                                                                                                              |                                                                                                                                                                               |           |
| Moradi (1999) | Swedish nationwide censuses in 1960 & 1970 | Sweden        | 1960-1989                             | 40-85     | Female | 704904      | Occupational                           | RR          | Sedentary: 1.10 (1.00, 1.10);<br>Light: 1.10 (1.00, 1.10);<br>Medium: 1.00 (1.00, 1.10);<br>Very High/High: 1.00                                                            | Age, Calendar Year of Follow Up, Place of Residence, Socioeconomic Status                                                                                                     | 6         |
| Moradi (2002) | Swedish Twin Registry                      | Sweden        | 1967-1997<br>Mean follow-up 15 years. | 42-70     | Female | 9539        | Recreation<br><br>Occupation           | RR          | Sedentary: 1.00<br>Moderate: 0.90 (0.70, 1.20);<br>Regular Activity: 0.80 (0.60, 1.20)<br><br>Sedentary: 1.00<br>Active: 0.90 (0.70, 1.20);<br>Strenuous: 1.00 (0.70, 1.50) | Age                                                                                                                                                                           | 5         |
| Peters (2009) | NIH-AARP Diet and Health Study             | United States | 1995-2003.<br>Mean follow up 7 years  | 50-71     | Female | 182862      | Recreation+<br>Housework               | RR          | Inactive: 1.00;<br><1 Time/Week: 1.00 (0.92, 1.08);<br>1-2 Times/Week: 0.96 (0.89, 1.03);<br>3-4 Times/Week: 0.97 (0.90, 1.04);<br>≥ 5 Times/Week: 0.92 (0.85, 1.00)        | Age, Race/Ethnicity, Education, Smoking, Family History<br>Breast Cancer, Menopausal Hormone Use, Age at First Birth, Age at Menarche, Age at Menopause, Parity, Alcohol, BMI | 7         |
| Pronk (2011)  | Shanghai Women's Health Study (SWHS)       | China         | 1996-2007                             | 40-70     | Female | 74049       | Recreation+<br>Household+<br>Commuting | HR          | 0-<74.3 MET hr/week: 1.00;<br>74.3-<100.2 MET hr/week: 1.07 (0.87, 1.30);<br>100.2-<131.5 MET hr/week: 0.96 (0.78, 1.18);<br>131.5+ MET hr/week: 0.98                       | Age, Education, Family History<br>Breast Cancer, Age at First Birth, Number of Pregnancies                                                                                    | 8         |



| Author (Year)   | Study Name                                                                        | Country       | Time Period | Age Range | Sex    | Sample Size | Activity Type    | Effect Type | Effect                                                                                                                                                                                                                                                                                                                                                                                                                                                              | Covariates adjusted                       | NOS score |
|-----------------|-----------------------------------------------------------------------------------|---------------|-------------|-----------|--------|-------------|------------------|-------------|---------------------------------------------------------------------------------------------------------------------------------------------------------------------------------------------------------------------------------------------------------------------------------------------------------------------------------------------------------------------------------------------------------------------------------------------------------------------|-------------------------------------------|-----------|
|                 |                                                                                   |               |             |           |        |             | Occupationa<br>1 |             | (0.79, 1.21)<br><br><4.64: 1.00;<br>4.64-<9.61: 1.00<br>(0.82, 1.22); 9.61-<br><10: 0.95 (0.76,<br>1.18);<br>10: 0.73 (0.53,<br>0.99)                                                                                                                                                                                                                                                                                                                               |                                           |           |
| Rintala (2002)  | 1970 population census of Finland (link job codes to the Finnish Cancer Registry) | Finland       | 1971-1995   | 25-89     | Female | 680000      | Occupationa<br>1 | RR          | Age 25-39:<br>Low (Class 1+2): 1.00;<br>Q2 (Class 3): 0.99 (0.85, 1.17);<br>Q3 (Class 4): 0.90 (0.76, 1.07);<br>High (Class 5): 0.68 (0.51, 0.93)<br><br>Age 40-54:<br>Low (Class 1+2): 1.00;<br>Q2 (Class 3): 1.02 (0.94, 1.11);<br>Q3 (Class 4): 0.99 (0.91, 1.09);<br>High (Class 5): 0.84 (0.70, 1.00)<br><br>Age 55-89:<br>Low (Class 1+2): 1.00;<br>Q2 (Class 3): 1.01 (0.96, 1.07);<br>Q3 (Class 4): 1.04 (0.98, 1.11);<br>High (Class 5): 0.82 (0.71, 0.94) | Social Class, Reproductive Factors        | 5         |
| Rockhill (1999) | Nurses' Health                                                                    | United States | 1980-1996   | 34-59     | Female | 85364       | Recreation       | RR          | <1 hr/week: 1.00;<br>1.0-1.9 hr/week:                                                                                                                                                                                                                                                                                                                                                                                                                               | Age at Baseline, Age at Menarche, History | 7         |

| Author (Year)    | Study Name                                   | Country       | Time Period                   | Age Range | Sex    | Sample Size | Activity Type         | Effect Type | Effect                                                                                                                                                                                                                                                                                     | Covariates adjusted                                                                                                                                                                                                           | NOS score |
|------------------|----------------------------------------------|---------------|-------------------------------|-----------|--------|-------------|-----------------------|-------------|--------------------------------------------------------------------------------------------------------------------------------------------------------------------------------------------------------------------------------------------------------------------------------------------|-------------------------------------------------------------------------------------------------------------------------------------------------------------------------------------------------------------------------------|-----------|
|                  | Study                                        |               |                               |           |        |             |                       |             | 0.88 (0.79, 0.98);<br>2.0-3.9 hr/week:<br>0.89 (0.81, 0.99);<br>4.0-6.9 hr/week:<br>0.85 (0.77, 0.94);<br>≥7 hr/week: 0.82<br>(0.70, 0.97)                                                                                                                                                 | of Benign Breast Disease, History of Breast Cancer in Mother and/or Sister, Height, Parity and Age at First Birth, BMI at Age 18, Menopausal Status, Postmenopausal Hormone Use                                               |           |
| Rosenberg (2014) | Black Women's Health Study                   | United States | 1995-2011                     | 30-69     | Female | 44078       | Recreation            | RR          | Vigorous Exercise, <1 H/Wk: 1.00;<br>Vigorous Exercise, 1 H/Wk: 0.85 (0.70, 1.03);<br>Vigorous Exercise, 2 H/Wk: 0.99 (0.83, 1.19);<br>Vigorous Exercise, 3-4 H/Wk: 0.94 (0.79, 1.12);<br>Vigorous Exercise, 5-6 H/Wk: 0.89 (0.69, 1.14);<br>Vigorous Exercise, ≥7 H/Wk: 0.74 (0.57, 0.96) | Adjusted for Age (Single Year), Time Period (Questionnaire Cycle), Years of Education (12, 13-15, 16, 17), Parity (0, 1, 2, 3), Vegetable/Fruit Dietary Pattern (Quintiles), and Meat/Fried Foods Dietary Pattern (Quintiles) | 5         |
| Sesso (1998)     | The College Alumni Health Study              | United States | 1962-1993                     | 37-69     | Female | 1566        | Recreation, Commuting | RR          | <500 kcal/week: 1.00;<br>500-999 kcal/week: 0.92 (0.58, 1.45);<br>1000+ kcal/week: 0.73 (0.46, 1.14)                                                                                                                                                                                       | Age, BMI                                                                                                                                                                                                                      | 3         |
| Silvera (2006)   | The Canadian National Breast Screening Study | Canada        | 1980-2000 mean follow-up 16.4 | 40-59     | Female | 40318       | Recreation+housework  | HR          | 0-30 Min/Day: 1.06 (0.88, 1.27);<br>30-60 Min/Day: 0.98 (0.83, 1.16);<br>>60 Min/Day: 0.93 (0.78, 1.10)                                                                                                                                                                                    | Age, Alcohol, Smoking, Oral Contraceptive Use, Hormone Replacement Therapy, Parity, Age                                                                                                                                       | 7         |

| Author (Year)    | Study Name                                                          | Country                                                                             | Time Period                                        | Age Range | Sex    | Sample Size | Activity Type                    | Effect Type | Effect                                                                                                                                                     | Covariates adjusted                                                                                                                                                                                                                              | NOS score |
|------------------|---------------------------------------------------------------------|-------------------------------------------------------------------------------------|----------------------------------------------------|-----------|--------|-------------|----------------------------------|-------------|------------------------------------------------------------------------------------------------------------------------------------------------------------|--------------------------------------------------------------------------------------------------------------------------------------------------------------------------------------------------------------------------------------------------|-----------|
|                  | (NBSS)                                                              |                                                                                     | years                                              |           |        |             |                                  |             |                                                                                                                                                            | at Menarche, Age at First Birth, Family History of Breast Cancer, History of Breast Disease, Menopausal Status at Baseline, Center, Randomization Group, Energy Intake, BMI                                                                      |           |
| Steindorf (2012) | European Prospective Investigation into Cancer and Nutrition (EPIC) | Denmark, France, Germany, Greece, Italy, Netherlands, Spain, United Kingdom, Sweden | 1992-2008<br>Median length of follow up 11.6 years | 20-98.5   | Female | 257805      | Recreation+ Housework+ Commuting | HR          | ≤50.5 MET hr/week: 1.00;<br>>50.5-81.4 MET hr/week: 0.94 (0.88, 0.99);<br>>81.4-123 MET hr/week: 0.90 (0.84, 0.96);<br>>123 MET hr/week: 0.87 (0.81, 0.94) | Age, Center, BMI, Age at First Period, Age at First Full Term Pregnancy, Number of Full Term Pregnancies, Breast Feeding, Oral Contraceptive Pill, Menopausal Status, Age at Menopause, Hormone Replacement Therapy, Alcohol, Smoking, Education | 7         |
| Suzuki (2008)    | Japan Collaborative Cohort Study (JACC)                             | Japan                                                                               | 1988-2001<br>Median follow up 12.4 years           | 40-69     | Female | 30157       | Recreation                       | HR          | Never or Seldom: 1.0;<br>1-2 Hr/Day: 0.83 (0.56, 1.23);<br>≥3 Hr/Day: 0.85 (0.51, 1.40)                                                                    | Age, BMI, Alcohol, Education, Parity, Age at First Birth, Use of Exogenous Female Hormone, Family History Breast Cancer First-Degree Relative, Menopausal Status, Menopausal Age                                                                 | 8         |
| Suzuki (2011)    | Japan Public Health Center-based                                    | Japan                                                                               | 1990-2007                                          | 40-69     | Female | 23977       | Total daily activity             | RR          | Tertile 1 (Low): 1.00;<br>Tertile 2: 1.13 (0.82, 1.56);<br>Tertile 3 (High):                                                                               | Age, Area, Height, Recent BMI, BMI At Age 20, Smoking Status, Age at Menarche, Age at                                                                                                                                                            | 7         |

| Author (Year)  | Study Name                                                              | Country       | Time Period                           | Age Range | Sex    | Sample Size | Activity Type                | Effect Type | Effect                                                                                                                                                                                                  | Covariates adjusted                                                                                                                                                         | NOS score |
|----------------|-------------------------------------------------------------------------|---------------|---------------------------------------|-----------|--------|-------------|------------------------------|-------------|---------------------------------------------------------------------------------------------------------------------------------------------------------------------------------------------------------|-----------------------------------------------------------------------------------------------------------------------------------------------------------------------------|-----------|
|                | Prospective Study                                                       |               |                                       |           |        |             |                              |             | 1.03 (0.75, 1.41)                                                                                                                                                                                       | First Birth, Parity, Age at Menopause, Use of Exogenous Hormones, Alcohol, Energy Adjusted Intake of Isoflavones, Participation Frequency in Leisure-Time Physical Activity |           |
| Thune (1997)   | National Health Screening Service in Norway                             | Norway        | 1974-1994 Median follow-up 13.7 years | 20-54     | Female | 25624       | Recreation<br><br>Occupation | RR          | Sedentary: 1.00; Moderate: 0.93 (0.71, 1.22); Regular Exercise: 0.63 (0.42, 0.95)<br><br>Sedentary: 1.00; Walking: 0.84 (0.63, 1.12); Lifting: 0.74 (0.52, 1.06); Heavy Manual Labor: 0.48 (0.25, 0.92) | Age, BMI, Height, County of Residence, Number of Children                                                                                                                   | 7         |
| Wyrwich (2000) | Longitudinal Study on Aging (LSOA)                                      | United States | 1984-1991                             | 70-98     | Female | 3131        | Recreation+ Housework        | HR          | Inactive: 1.00; Moderate: 0.63 (0.38, 1.18); High: 0.51 (0.22, 1.16)                                                                                                                                    | Prior Cancer, Age, BMI, Education, Excluding Breast Cancer Cases in First 2 Years                                                                                           | 5         |
| Wyshak (2000)  | Alumnae listed as alive by the alumnae office of eight colleges and two | United States | 1981-1996                             | 22-78     | Female | 3940        | Recreation                   | OR          | Inactive: 1.00; Active: 0.61 (0.44, 0.84)                                                                                                                                                               | Age, Ever-Pregnant, Use of Contraceptives, Use of Hormone Replacement Therapy, Family History of Breast Cancer, Current Exercise, Ever                                      | 5         |

| Author (Year) | Study Name                                            | Country | Time Period | Age Range | Sex | Sample Size | Activity Type | Effect Type | Effect | Covariates adjusted      | NOS score |
|---------------|-------------------------------------------------------|---------|-------------|-----------|-----|-------------|---------------|-------------|--------|--------------------------|-----------|
|               | universities (former athletes vs former non-athletes) |         |             |           |     |             |               |             |        | Smoked, Percent Body Fat |           |

**Table B.** Characteristics and quality assessment of studies included in the meta-regression analysis for the association between physical activity and colon cancer

| Author (Year)  | Study Name                                                | Country       | Time Period | Age Range | Sex    | Sample Size | Activity Type | Effect Type | Effect                                                                                                                                                              | Covariates adjusted                                                                                                        | NOS score |
|----------------|-----------------------------------------------------------|---------------|-------------|-----------|--------|-------------|---------------|-------------|---------------------------------------------------------------------------------------------------------------------------------------------------------------------|----------------------------------------------------------------------------------------------------------------------------|-----------|
| Bostick (1994) | The Iowa Women's Health Study cohort                      | United States | 1986-1990   | 55-69     | Female | 35215       | Recreation    | RR          | Low: 1.00; Moderate: 0.92 (0.68, 1.28); Vigorous: 0.95 (0.68, 1.39)                                                                                                 | Age, Total Energy Intake, Height, Parity, Total Vit E Intake, Total Vit E by Age Interaction Term, Vit A Supplement Intake | 5         |
| Calton (2006)  | The Breast Cancer Detection Demonstration Project (BCDDP) | United States | 1987-1998   | 55-75     | Female | 31783       | All activity  | RR          | 34-48.5 MET hr/day: 1.0; 48.51-54.3 MET hr/day: 1.45 (0.98, 2.15); 54.31-59.0 MET hr/day: 1.16 (0.77, 1.75); 59.1-64.9 MET hr/day: 1.27 (0.84, 1.91); 65.0-91.1 MET | Age, BMI, Education, History of Colorectal Cancer, Smoking, Menopausal Hormone Use, Aspirin Use, Alcohol, Energy-Adjusted  | 8         |

| Author (Year)       | Study Name                                                  | Country                      | Time Period                       | Age Range | Sex  | Sample Size | Activity Type                  | Effect Type | Effect                                                                                                                                                                                                    | Covariates adjusted                                                                                                                                              | NOS score |
|---------------------|-------------------------------------------------------------|------------------------------|-----------------------------------|-----------|------|-------------|--------------------------------|-------------|-----------------------------------------------------------------------------------------------------------------------------------------------------------------------------------------------------------|------------------------------------------------------------------------------------------------------------------------------------------------------------------|-----------|
|                     |                                                             |                              |                                   |           |      |             |                                |             | hr/day: 1.15 (0.76, 1.75)                                                                                                                                                                                 | Intake Calcium, Energy-Adjusted Intake Red Meat                                                                                                                  |           |
| Chao (2004)         | The Cancer Prevention Study II Nutrition Cohort             | United States                | 1992-1999                         | 50-74     | Both | 151174      | Recreation                     | RR          | No Activity: 1.00; <7 MET hr/week: 0.93 (0.75, 1.16); 7-13 MET hr/week: 0.88 (0.68, 1.13); 14-23 MET hr/week: 0.84 (0.66, 1.06); 24-29 MET hr/week: 0.89 (0.68, 1.15); ≥30 MET hr/week: 0.65 (0.49, 0.87) | Age, Education, Exercise Level in 1982, Cigarette Smoking, Alcohol, Red Meat, Folate, Fiber, Multivitamin Use in 1982, Hormone Replacement Therapy in women, Sex | 6         |
| Colbert (2001)      | The Alpha-Tocopherol, Beta-Carotene Cancer Prevention study | Finland                      | 1985-1997 Mean follow-up 6 years. | 50-69     | Male | 29133       | Recreation<br><br>Occupational | RR          | Sedentary: 1.00; Active: 0.82 (0.59, 1.13)<br><br>Sedentary: 1.00; Light: 0.60 (0.34, 1.04); Moderate/Heavy: 0.45 (0.26, 0.78)                                                                            | Age, Supplement Group, BMI, Cigarettes/Day                                                                                                                       | 6         |
| Fraser (1993)       | New Zealand Cancer Registry                                 | New Zealand                  | 1972-1980                         | 15-64     | Male | 1651        | Occupational                   | RR          | Sedentary: 1.18 (1.02, 1.36); High: 1.00                                                                                                                                                                  | -                                                                                                                                                                | 3         |
| Friedenreich (2006) | The EPIC study                                              | France, Italy, Spain, United | 1992-2003                         | 35-70     | Both | 413044      | Recreation                     | HR          | <12.0 MET hr/week: 1.00; ≥12.0-<24.8 MET hr/week: 0.85 (0.71,                                                                                                                                             | Age, Study Center, Kcal/Day Quartiles,                                                                                                                           | 7         |

| Author (Year)      | Study Name                           | Country                                                | Time Period               | Age Range | Sex            | Sample Size              | Activity Type         | Effect Type | Effect                                                                                                                                                                                                                                                                  | Covariates adjusted                                                                                                                                                                                                              | NOS score |
|--------------------|--------------------------------------|--------------------------------------------------------|---------------------------|-----------|----------------|--------------------------|-----------------------|-------------|-------------------------------------------------------------------------------------------------------------------------------------------------------------------------------------------------------------------------------------------------------------------------|----------------------------------------------------------------------------------------------------------------------------------------------------------------------------------------------------------------------------------|-----------|
|                    |                                      | Kingdom, Netherlands, Greece, Germany, Sweden, Denmark |                           |           |                |                          |                       |             | 1.00);<br>≥24.8-<42.8 MET<br>hr/week: 0.83 (0.70, 0.98);<br>≥42.8 MET<br>hr/week: 0.88 (0.74, 1.05)                                                                                                                                                                     | Education, Smoking, Height, Weight, Fiber                                                                                                                                                                                        |           |
| Gerhardsson (1986) | Swedish census                       | Sweden                                                 | 1960-1979                 | 20-64     | Male           | 1100000                  | Occupational          | RR          | Sedentary: 1.30 (1.20, 1.50);<br>Active: 1.00                                                                                                                                                                                                                           | Age, Population Density, Social Class                                                                                                                                                                                            | 5         |
| Giovannucci (1995) | Health Professionals Follow-up Study | United States                                          | 1986-1992                 | 40-75     | Male           | 47723                    | Recreation            | RR          | By MET hr/week quintile (Quintile median MET hr/week):<br>Q1 (0.9 MET hr/week): 1.00;<br>Q2 (4.8 MET hr/week): 0.73 (0.48, 1.10);<br>Q3 (11.3 MET hr/week): 0.94 (0.63, 1.39);<br>Q4 (22.6 MET hr/week): 0.78 (0.51, 1.20);<br>Q5 (46.8 MET hr/week): 0.53 (0.32, 0.88) | BMI, Age, History Endoscopic Screening or Polyp Diagnosis, Parental History of Colorectal Cancer, Pack-Years Smoking, Aspirin Use, Folate Intake, Methionine Intake, Alcohol, Fiber Intake, Red Meat Intake, Total Energy Intake | 7         |
| Howard (2008)      | The NIH-AARP Diet and Health         | United States                                          | 1995-2003. Mean follow up | 50-71     | Male<br>Female | 175600 (males)<br>125073 | Recreation+ Household | RR          | By MET hr/week quintile (Quintile Median)<br>Male:                                                                                                                                                                                                                      | Age, Smoking, Alcohol, Education, Race, Family                                                                                                                                                                                   | 7         |

| Author (Year)  | Study Name                | Country | Time Period                         | Age Range | Sex  | Sample Size | Activity Type | Effect Type | Effect                                                                                                                                                                                                                                                                                                                                                                                                                                                                             | Covariates adjusted                                                                                                                                       | NOS score |
|----------------|---------------------------|---------|-------------------------------------|-----------|------|-------------|---------------|-------------|------------------------------------------------------------------------------------------------------------------------------------------------------------------------------------------------------------------------------------------------------------------------------------------------------------------------------------------------------------------------------------------------------------------------------------------------------------------------------------|-----------------------------------------------------------------------------------------------------------------------------------------------------------|-----------|
|                | Study                     |         | 6.9 years.                          |           |      | (females)   |               |             | <p>Q1 (5.53 MET hr/week): 1.00;<br/> Q2 (16.52 MET hr/week): 0.87 (0.74, 1.04);<br/> Q3 (29.97 MET hr/week): 0.77 (0.65, 0.91);<br/> Q4 (45.43 MET hr/week): 0.68 (0.57, 0.81);<br/> Q5 (66.08 MET hr/week): 0.79 (0.66, 0.94)</p> <p>Female:<br/> Q1 (8.07 MET hr/week): 1.00;<br/> Q2 (20.99 MET hr/week): 0.94 (0.74, 1.18);<br/> Q3 (35.72 MET hr/week): 0.85 (0.64, 1.13);<br/> Q4 (53.43 MET hr/week): 0.92 (0.73, 1.17);<br/> Q5 (66.08 MET hr/week): 0.92 (0.71, 1.18)</p> | History Colon Cancer, Total Energy, Energy-Adjusted Intake Red Meat, Calcium, Whole Grains, Fruit, Vegetables, BMI, hormone therapy (for female analysis) |           |
| Larsson (2006) | The cohort of Swedish men | Sweden  | 1997-2005. Mean follow up 7.1 years | 45-79     | Male | 45906       | All activity  | HR          | <37.9 MET hr/day: 1.00;<br>37.9-40.7 MET hr/day: 0.84 (0.62, 1.13);<br>40.8-44.8 MET hr/day: 1.00 (0.76, 1.33);<br>≥44.9 MET hr/day: 0.82 (0.60, 1.10)                                                                                                                                                                                                                                                                                                                             | Age, Education, Family History of Colorectal Cancer, History of Diabetes, Smoking, Aspirin Use, BMI                                                       | 7         |



| Author (Year) | Study Name                                         | Country       | Time Period                          | Age Range | Sex            | Sample Size                      | Activity Type        | Effect Type | Effect                                                                                                                                                                                                                                                                                                                                                                    | Covariates adjusted                                                                                                               | NOS score |
|---------------|----------------------------------------------------|---------------|--------------------------------------|-----------|----------------|----------------------------------|----------------------|-------------|---------------------------------------------------------------------------------------------------------------------------------------------------------------------------------------------------------------------------------------------------------------------------------------------------------------------------------------------------------------------------|-----------------------------------------------------------------------------------------------------------------------------------|-----------|
| Lee (1994)    | Harvard Alumni Study                               | United States | 1962-1988                            | 30-79     | Male           | 17607                            | Recreation+transport | RR          | <1000 kcal/day: 1.00;<br>1000-2499 kcal/day: 0.75 (0.42, 1.35);<br>≥2500 kcal/day: 0.94 (0.54, 1.64)                                                                                                                                                                                                                                                                      | Age, Quetelet's Index, Parental History of Cancer                                                                                 | 5         |
| Lee (1997)    | The Physicians' Health Study                       | United States | 1982-1994. Mean follow up 10.9 years | 40-84     | Male           | 21807                            | Recreation           | RR          | Frequency of vigorous exercise:<br><1 time per/week: 1.00;<br>1 time/week: 1.10 (0.70, 1.70);<br>2-4 times/week: 1.20 (0.80, 1.60);<br>5+ times/week: 1.10 (0.70, 1.60)                                                                                                                                                                                                   | Age, Obesity, Alcohol, Randomization Assignment                                                                                   | 6         |
| Lee (2007)    | Japan Public Health Center-based Prospective Study | Japan         | 1995-2002. Mean follow up 5.8 years. | 45-74     | Male<br>Female | 29842 (males)<br>35180 (females) | All activity         | RR          | By MET hr/day quartile (quintile mediana in MET hr/day)<br>Males:<br>Q1 (28.25 MET hr/day): 1.00;<br>Q2 (33.25 MET hr/day): 0.87 (0.61, 1.26);<br>Q3 (35.25 MET hr/day): 0.62 (0.41, 0.95);<br>Q4 (43.75 MET hr/day): 0.58 (0.39, 0.87)<br><br>Females:<br>Q1 (28.5 MET hr/day): 1.00;<br>Q2 (33.25 MET hr/day): 1.03 (0.65, 1.64);<br>Q3 (35.25 MET hr/day): 0.91 (0.57, | Age, Study Area, Family History of Colorectal Cancer, Smoking, Alcohol, BMI, Intake Red Meat, Intake Dietary Fiber, Intake Folate | 8         |

| Author (Year) | Study Name                                   | Country       | Time Period                                     | Age Range | Sex                | Sample Size                             | Activity Type | Effect Type | Effect                                                                                                                                                                                                                                                                  | Covariates adjusted                                                       | NOS score |
|---------------|----------------------------------------------|---------------|-------------------------------------------------|-----------|--------------------|-----------------------------------------|---------------|-------------|-------------------------------------------------------------------------------------------------------------------------------------------------------------------------------------------------------------------------------------------------------------------------|---------------------------------------------------------------------------|-----------|
|               |                                              |               |                                                 |           |                    |                                         |               |             | 1.47);<br>Q4 (43.75 MET hr/day): 0.89 (0.54, 1.49)                                                                                                                                                                                                                      |                                                                           |           |
| Mai (2007)    | California Teachers Study                    | United States | 1995-2002<br>Mean length of follow up 6.6 years | 22-84     | Female             | 120147                                  | Recreation    | RR          | Lifetime strenuous activity:<br>0-0.5 hr/week: 1.00;<br>0.51-1.99 hr/week: 0.98 (0.77, 1.24);<br>≥2.0 hr/week: 0.99 (0.78, 1.27)<br><br>Lifetime moderate activity”<br>0-0.5 hr/week: 1.00;<br>0.51-1.99 hr/week: 0.74 (0.57, 0.95);<br>≥2.0 hr/week: 0.79 (0.62, 1.00) | Race, Age                                                                 | 5         |
| Moradi (2008) | Swedish census of the Population and Housing | Sweden        | 1960-1989                                       | 25-85     | Male<br><br>Female | 1343696 (males)<br><br>699519 (females) | Occupational  | RR          | Male:<br>Sedentary: 1.30 (1.20, 1.40);<br>Light: 1.30 (1.20, 1.30);<br>Moderate: 1.20 (1.10, 1.20);<br>Very High/High: 1.00<br><br>Female:<br>Sedentary: 1.10 (1.10, 1.30);<br>Light: 1.10 (1.00, 1.20);<br>Moderate: 1.00 (0.90, 1.10);<br>Very High/High: 1.00        | Age, Calendar Year of Follow-Up, Place of Residence, Socioeconomic Status | 5         |
| Nilsen (2008) | Nord-Trondelag                               | Norway        | 1984-2002                                       | 20-101    | Both               | 59369                                   | Recreation    | HR          | No Activity: 1.00;<br>Low: 0.87 (0.70,                                                                                                                                                                                                                                  | Sex, BMI, Smoking                                                         | 7         |

| Author (Year)   | Study Name                                                           | Country       | Time Period                                                             | Age Range | Sex            | Sample Size                      | Activity Type        | Effect Type | Effect                                                                                                                                                                                | Covariates adjusted                                                                                                                           | NOS score |
|-----------------|----------------------------------------------------------------------|---------------|-------------------------------------------------------------------------|-----------|----------------|----------------------------------|----------------------|-------------|---------------------------------------------------------------------------------------------------------------------------------------------------------------------------------------|-----------------------------------------------------------------------------------------------------------------------------------------------|-----------|
|                 | Health Study                                                         |               |                                                                         |           |                |                                  |                      |             | 1.08);<br>High: 0.73 (0.58, 0.92)                                                                                                                                                     | Status, Alcohol, Education, Marital Status (used attained age as the time variable)                                                           |           |
| Severson (1989) | Cohort of Japanese men living on the Hawaiian island of Oahu in 1965 | United States | 1965-1986                                                               | 46-65     | Male           | 8006                             | All 24-hour activity | RR          | Lowest tertile: 1.00; Middle tertile: 0.56 (0.39, 0.80); Highest tertile: 0.71 (0.51, 0.99)                                                                                           | Age, BMI                                                                                                                                      | 5         |
| Thune (1996)    | A Population-based cohort in Norway                                  | Norway        | 1972-1991. Mean follow up 16.3 years in males and 15.5 years in females | 20-49     | Male<br>Female | 52242 (males)<br>28274 (females) | Work+Recreation      | RR          | Males:<br>Sedentary: 1.00;<br>Moderate: 1.18 (0.76, 1.82);<br>Active: 0.97 (0.63, 1.5)<br><br>Females:<br>Sedentary: 1.00<br>Moderate: 0.97 (0.33, 2.77)<br>Active: 0.63 (0.39, 1.04) | Age at Entry, BMI, Geographic Region                                                                                                          | 6         |
| Wolin (2007)    | Nurses' Health Study                                                 | United States | 1986-2002                                                               | 40-65     | Female         | 79295                            | Recreation           | RR          | <2 MET hr/week: 1.00;<br>2.1-4.5 MET hr/week: 0.88 (0.68, 1.14);<br>4.6-10.3 MET hr/week: 0.91 (0.70, 1.17);<br>10.4-21.4 MET hr/week: 0.82 (0.62, 1.07);<br>≥21.5 MET                | Age, BMI, Smoking, Multivitamin Use, Aspirin, Alcohol, Red Meat Intake, Vit D, Calcium, Family History<br>Colon Cancer, Endoscopy, History of | 7         |

| <b>Author<br/>(Year)</b> | <b>Study<br/>Name</b> | <b>Countr<br/>y</b> | <b>Time<br/>Period</b> | <b>Age<br/>Range</b> | <b>Sex</b> | <b>Sample<br/>Size</b> | <b>Activity<br/>Type</b> | <b>Effect<br/>Type</b> | <b>Effect</b>                 | <b>Covariates<br/>adjusted</b> | <b>NOS score</b> |
|--------------------------|-----------------------|---------------------|------------------------|----------------------|------------|------------------------|--------------------------|------------------------|-------------------------------|--------------------------------|------------------|
|                          |                       |                     |                        |                      |            |                        |                          |                        | hr/week: 0.77 (0.58,<br>1.01) | Polyps                         |                  |

**Table C.** Characteristics and quality assessment of studies included in the meta-regression analysis for the association between physical activity and diabetes

| Author (Year)    | Study Name             | Country       | Time Period | Age Range | Sex            | Sample Size                  | Activity Type             | Effect Type | Effect                                                                                                                                                                                                                                 | Covariates adjusted                                                                                                                                               | NOS score |
|------------------|------------------------|---------------|-------------|-----------|----------------|------------------------------|---------------------------|-------------|----------------------------------------------------------------------------------------------------------------------------------------------------------------------------------------------------------------------------------------|-------------------------------------------------------------------------------------------------------------------------------------------------------------------|-----------|
| Baan (1999)      | The Rotterdam Study    | Netherlands   | 1990-1994   | 55-75     | Male<br>Female | 503 (males)<br>513 (females) | Recreation                | OR          | Males:<br><847 min/week: 1.00;<br>847-<1860 min/week: 0.67 (0.32, 1.43);<br>≥1860 min/week: 0.74 (0.34, 1.59)<br><br>Females:<br><1245 min/week: 1.00;<br>1245-<2007 min/week: 0.89 (0.40, 1.99);<br>≥2007 min/week: 0.80 (0.34, 1.88) | Age, BMI, Waist-Hip Ratio, Family History of Diabetes, Smoking                                                                                                    | 5         |
| Bonora (2004)    | The Bruneck Study      | Italy         | 1990-2000   | 40-80     | Both           | 7884                         | Recreation and Occupation | OR          | Low Physical Activity: 1.00;<br>High Physical Activity: 0.80 (0.50, 1.40)                                                                                                                                                              | Age and Sex                                                                                                                                                       | 6         |
| Burchfiel (1995) | Honolulu Heart Program | United States | 1965-1974   | 45-68     | Male           | 6811                         | Total                     | OR          | Lower Four Quintiles: 1.00;<br>Upper Quintile: 0.50 (0.34, 0.73)                                                                                                                                                                       | Age, Body Mass Index, Subscapularlt riceps Skinfold Ratio, Systolic Blood Pressure, Triglycerides, Glucose, Hematocrit, and Parental History of Diabetes. Free of | 6         |

| Author (Year)   | Study Name                                      | Country | Time Period                            | Age Range | Sex  | Sample Size                     | Activity Type                              | Effect Type | Effect                                                                                                                                                                               | Covariates adjusted                                                                                                                                                      | NOS score |
|-----------------|-------------------------------------------------|---------|----------------------------------------|-----------|------|---------------------------------|--------------------------------------------|-------------|--------------------------------------------------------------------------------------------------------------------------------------------------------------------------------------|--------------------------------------------------------------------------------------------------------------------------------------------------------------------------|-----------|
|                 |                                                 |         |                                        |           |      |                                 |                                            |             |                                                                                                                                                                                      | Prevalent and Incident Cardiovascular Disease during Study Period.                                                                                                       |           |
| Carlsson (2007) | Nord-Trøndelag Health Survey                    | Norway  | 1984-1997<br>Mean follow up 6.5 years. | ≥20 years | Both | 38128                           | Recreation                                 | RR          | Never: 2.03 (1.52, 2.71);<br>Less Than Once Per Week: 1.61 (1.24, 2.10);<br>Once Per Week: 1.24 (0.94, 1.62);<br>Two or Three Times Per Week: 1.21 (0.92, 1.59);<br>Every Day: 1.00  | Sex, BMI, Smoking                                                                                                                                                        | 5         |
| Carlsson (2013) | The Swedish Twin Registry                       | Sweden  | 1967-2002                              | 30-99     | Male | 23539                           | Recreation                                 | HR          | Low: 1.00<br>Moderate: 0.77 (0.61, 0.96);<br>High: 0.53 (0.37, 0.75)                                                                                                                 | Smoking, Occupation, Alcohol Consumption                                                                                                                                 | 5         |
| Chien (2009)    | Chin-Shan community cardiovascular cohort study | China   | 1990-2000<br>Mean follow up 5 years.   | ≥35       | Both | 11690<br><br>12251<br><br>12566 | Occupation<br><br>Recreation<br><br>Sports | RR          | Q1: 1.00;<br>Q2: 0.75 (0.54, 1.05);<br>Q3: 0.75 (0.50, 1.12);<br>Q4: 0.97 (0.69, 1.37)<br><br>Q1: 1.00;<br>Q2: 1.09 (0.80, 1.49);<br>Q3: 1.07 (0.77, 1.48);<br>Q4: 1.24 (0.87, 1.75) | Metabolic Syndrome, BMI, Gender, and Age Groups, Smoking, Current Alcohol Drinking (Regular/No), Marital Status (Single, Married and Living with Spouse, or Divorced and | 8         |

| Author (Year)    | Study Name | Country        | Time Period                            | Age Range | Sex  | Sample Size | Activity Type | Effect Type | Effect                                                                                             | Covariates adjusted                                                                                                                                                                                            | NOS score |
|------------------|------------|----------------|----------------------------------------|-----------|------|-------------|---------------|-------------|----------------------------------------------------------------------------------------------------|----------------------------------------------------------------------------------------------------------------------------------------------------------------------------------------------------------------|-----------|
|                  |            |                |                                        |           |      |             |               |             | Q1: 1.00;<br>Q2: 0.82 (0.60, 1.12);<br>Q3: 0.65 (0.47, 0.89);<br>Q4: 0.68 (0.49, 0.95)             | Separated, Education Level (Less Than 9 Years, at Least 9 Years), Occupation (No Work, Labor, Official or Business), Hypertension Status, HDL-C, Triglycerides, Glucose Levels and Family History of Diabetes. |           |
| Demakakos (2010) | ELSA       | United Kingdom | 2002-2007. Mean follow up 45.3 months. | 50+       | Both | 7466        | Recreation    | HR          | None: 1.00;<br>Low Intensity: 0.87 (0.58, 1.30);<br>Vigorous/Moderate Intensity: 0.64 (0.43, 0.95) | Age, Age-Squared, Sex, Marital Status, Educational Attainment, Total Household Wealth, BMI, Self-Reported Long-Standing Illness/Disability, Cardiovascular Comorbidities, Non-Cardiovascular Comorbidities     | 4         |

| Author (Year)   | Study Name                                                                                               | Country        | Time Period                             | Age Range | Sex    | Sample Size | Activity Type                 | Effect Type | Effect                                                                                                                                                                         | Covariates adjusted                                                                                                                                                                         | NOS score |
|-----------------|----------------------------------------------------------------------------------------------------------|----------------|-----------------------------------------|-----------|--------|-------------|-------------------------------|-------------|--------------------------------------------------------------------------------------------------------------------------------------------------------------------------------|---------------------------------------------------------------------------------------------------------------------------------------------------------------------------------------------|-----------|
|                 |                                                                                                          |                |                                         |           |        |             |                               |             |                                                                                                                                                                                | s, Health Behaviours, Elevated Depressive Symptoms                                                                                                                                          |           |
| Doi (2012)      | Population-based prospective study of cardiovascular disease and its risk factors                        | Japan          | 1988-2002<br>Mean follow up 11.8 years. | 20-99     | Both   | 1935        | Recreation                    | HR          | Regular exercise: 0.69 (0.43, 1.1)                                                                                                                                             | Age, Sex, Family History of Diabetes, Central Obesity, BMI, Hypertension, Smoking (/Day), FPG Levels                                                                                        | 8         |
| Dotevall (2004) | The BEDA Study                                                                                           | Sweden         | 1980-1998                               | 39-65     | Female | 1351        | Recreation and Occupation     | HR          | Not Sedentary: 1.00<br>Sedentary: 1.56 (0.96, 2.53)                                                                                                                            | Age, BMI, Triglycerides, and SBP                                                                                                                                                            | 6         |
| Elwood (2013)   | Caerphilly Cohort Study                                                                                  | United Kingdom | 1979-2009                               | 45-59     | Male   | 2235        | Transportation and Recreation | OR          | No Regular Exercise: 1.00;<br>Regular Exercise: 0.63 (0.46, 0.85)                                                                                                              | Age, Social Class                                                                                                                                                                           | 5         |
| Fan (2015)      | China Multicenter Collaborative Study of Cardiovascular Epidemiology & China Cardiovascular Health Study | China          | 1998-2008<br>Mean follow up 7.9 years.  | 35-74     | Both   | 6348        | Total                         | HR          | Sedentary (Pal, 1.00–1.39): 1.00;<br>Low Active (Pal, 1.40–1.59): 0.92 (0.69, 1.22); Active (Pal, 1.60–1.89): 0.67 (0.50, 0.89);<br>Very Active (Pal >1.89): 0.59 (0.45, 0.77) | Age, Sex, Geographic region (North or South), Educational level (0–6, 7–9, or ≥10 yrs), cigarette smoking (never, ever, or current), alcohol consumption (yes or no), and family history of | 6         |



| Author (Year) | Study Name                       | Country       | Time Period                       | Age Range | Sex    | Sample Size | Activity Type             | Effect Type | Effect                                                                                                                   | Covariates adjusted                                                                                                                                                                                                                           | NOS score |
|---------------|----------------------------------|---------------|-----------------------------------|-----------|--------|-------------|---------------------------|-------------|--------------------------------------------------------------------------------------------------------------------------|-----------------------------------------------------------------------------------------------------------------------------------------------------------------------------------------------------------------------------------------------|-----------|
|               |                                  |               |                                   |           |        |             |                           |             |                                                                                                                          | diabetes (yes or no), waist circumference                                                                                                                                                                                                     |           |
| Folsom (2000) | Iowa Women's Health Study Cohort | United States | 1986-1997                         | 55-69     | Female | 34257       | Recreation                | RR          | Low: 1.00; Medium: 0.91 (0.82, 1.02); High: 0.79 (0.70, 0.90)                                                            | Age, Education, Smoking, Alcohol, Estrogen Replacement, Energy Intake, Whole Grain Intake, Keys' Score, Family History Diabetes, BMI, Waist-To-Hip Ratio                                                                                      | 6         |
| Fretts (2009) | The Strong Heart Study           | United States | 1989-1999 Mean follow up 5 years. | 45-74     | Both   | 1651        | Recreation and Occupation | OR          | No activity: 1.00; <30 MET-h/wk: 0.70 (0.46, 1.03); 30-106 MET-h/wk: 0.72 (0.47, 1.08); >106 MET-h/wk: 0.71 (0.47, 1.07) | Age, Study Site, Sex, Education, Cigarette Smoking, Alcohol Use, Family History of Diabetes, Systolic Blood Pressure, Diastolic Blood Pressure, High Density Lipoprotein Cholesterol, Low Density Lipoprotein Cholesterol, Plasma Fibrinogen, | 7         |

| Author (Year)   | Study Name                                          | Country       | Time Period                | Age Range | Sex    | Sample Size        | Activity Type                 | Effect Type | Effect                                                                                                                                                                                                                                                                                          | Covariates adjusted                                                                                                                                                                                              | NOS score |
|-----------------|-----------------------------------------------------|---------------|----------------------------|-----------|--------|--------------------|-------------------------------|-------------|-------------------------------------------------------------------------------------------------------------------------------------------------------------------------------------------------------------------------------------------------------------------------------------------------|------------------------------------------------------------------------------------------------------------------------------------------------------------------------------------------------------------------|-----------|
|                 |                                                     |               |                            |           |        |                    |                               |             |                                                                                                                                                                                                                                                                                                 | Body Mass Index                                                                                                                                                                                                  |           |
| Grontved (2012) | Health Professionals Follow-up Study                | United States | 1990-2008                  | 40-75     | Male   | 32002              | Recreation                    | RR          | 0 Mins/Wk: 1.00;<br>1-59 Mins/Wk: 0.92 (0.81, 1.05);<br>60-149 Mins/Wk: 0.67 (0.58, 0.78);<br>>=150 Mins/Wk: 0.46 (0.40, 0.52)                                                                                                                                                                  | Age, Smoking, Alcohol Consumption, Coffee Intake, Race, Family History of Diabetes, Intake of Total Energy, Trans Fat, Polyunsaturated Fat To Saturated Fat Ratio, Cereal Fiber, Whole Grain, and Glycemic Load. | 6         |
| Grontved (2014) | Nurses' Health Study<br><br>Nurses' Health Study II | United States | 2000-2008<br><br>2001-2009 | 53-81     | Female | 51642<br><br>47674 | Recreation and Transportation | RR          | None: 1.00;<br>1-29 Mins/Wk: 0.94 (0.81, 1.09);<br>30-59 Mins/Wk: 0.88 (0.76, 1.02);<br>60-150 Mins/Wk: 0.85 (0.74, 0.96);<br>>150 Mins/Wk: 0.66 (0.58, 0.75)<br><br>None: 1.00;<br>1-29 Mins/Wk: 0.94 (0.79, 1.13);<br>30-59 Mins/Wk: 0.83 (0.69, 1.00);<br>60-150 Mins/Wk: 0.86 (0.73, 1.01); | Age, Smoking, Alcohol Consumption, Coffee Intake, Race, Family History of Diabetes, Post Menopausal Hormone Use, Intake of Total Energy, Trans Fat, Polyunsaturated Fat to Saturated Fat Ratio, Cereal           | 6         |

| Author (Year)   | Study Name                                                                                        | Country       | Time Period | Age Range | Sex            | Sample Size                 | Activity Type                    | Effect Type | Effect                                                                                                                                                                                                                                    | Covariates adjusted                                                                                                                                            | NOS score |
|-----------------|---------------------------------------------------------------------------------------------------|---------------|-------------|-----------|----------------|-----------------------------|----------------------------------|-------------|-------------------------------------------------------------------------------------------------------------------------------------------------------------------------------------------------------------------------------------------|----------------------------------------------------------------------------------------------------------------------------------------------------------------|-----------|
|                 |                                                                                                   |               |             |           |                |                             |                                  |             | >150 Mins/Wk:<br>0.70 (0.59, 0.83)                                                                                                                                                                                                        | Fiber, Wholegrain, and Glycemic Load, Oral Contraceptive Use, Menopausal Status, Resistance Exercise, Lower Intensity Muscular Conditioning Exercises, and BMI |           |
| Gurwitz (1994)  | The East Boston Senior Health Project                                                             | United States | 1982-1989   | 65+       | Both           | 2737                        | Recreation+ Housework            | OR          | Low: 1.50 (1.00, 2.10);<br>Moderate: 1.00<br>High: 1.40 (0.84, 2.40)                                                                                                                                                                      | Age, Sex, BMI, Alcohol, Blood Pressure, Self-Reported High Blood Sugar                                                                                         | 6         |
| Haapanen (1997) | Census data of a medium-size industrial town and two rural municipalities in northeastern Finland | Finland       | 1980-1990   | 35-63     | Male<br>Female | 891 (males)<br>973 (female) | Recreation, Household, Commuting | RR          | Males:<br>Low (0-1100 kcal/week): 1.54 (0.83, 2.84);<br>Moderate (1101-1900 kcal/week): 1.21 (0.63, 2.31);<br>High (>1900 kcal/week): 1.00<br><br>Females:<br>Low (0-900 kcal/week): 2.64 (1.28, 5.44);<br>Moderate (901-1500 kcal/week): | Age                                                                                                                                                            | 4         |

| Author (Year)   | Study Name                                                  | Country       | Time Period     | Age Range | Sex    | Sample Size | Activity Type | Effect Type | Effect                                                                                                                                                                                                                                                                                                                      | Covariates adjusted                                                                                                                    | NOS score |
|-----------------|-------------------------------------------------------------|---------------|-----------------|-----------|--------|-------------|---------------|-------------|-----------------------------------------------------------------------------------------------------------------------------------------------------------------------------------------------------------------------------------------------------------------------------------------------------------------------------|----------------------------------------------------------------------------------------------------------------------------------------|-----------|
|                 |                                                             |               |                 |           |        |             |               |             | 1.17 (0.50, 2.70);<br>High (>1500 kcal/week): 1.00                                                                                                                                                                                                                                                                          |                                                                                                                                        |           |
| Helmrich (1994) | The original University of Pennsylvania Alumni Health Study | United States | 1962-1976       | 39-68     | Male   | 5990        | Recreation    | RR          | <500 kcal/week: 1.00;<br>500-999 kcal/week: 0.94 (0.53, 1.73);<br>1000-1499 kcal/week: 0.79 (0.43, 1.49);<br>1500-1999 kcal/week: 0.78 (0.43, 1.49);<br>2000-2499 kcal/week: 0.68 (0.36, 1.31);<br>2500-2999 kcal/week: 0.90 (0.51, 1.67);<br>3000-3499 kcal/week: 0.86 (0.48, 1.61);<br>≥3500 kcal/week: 0.52 (0.26, 1.07) | Age                                                                                                                                    | 4         |
| Holme (2007)    | Oslo Study                                                  | Norway        | 1972-2000       | 40-49     | Male   | 6379        | Recreation    | OR          | Sedentary/Light: 1.00;<br>Moderate: 0.87 (0.68, 1.10);<br>Moderately Vigorous: 0.87 (0.64, 1.17);<br>Vigorous: 0.42 (0.17, 1.06)                                                                                                                                                                                            | Smoking, Age, Years of Education, Glucose, Triglycerides, Body Mass Index, Treated Hypertension, and Systolic Blood Pressure in 1972/3 | 5         |
| Hsia (2005)     | Women's Health Initiative                                   | United States | 1994-2002. Mean | 50-79     | Female | 86708       | Recreation    | HR          | 0-2.3 MET hr/week: 1.00;<br>2.3-7.4 MET                                                                                                                                                                                                                                                                                     | Age, BMI, Alcohol, Education,                                                                                                          | 7         |

| Author (Year) | Study Name                                | Country       | Time Period         | Age Range | Sex    | Sample Size | Activity Type | Effect Type | Effect                                                                                                                                                                                                                | Covariates adjusted                                                                                                                            | NOS score |
|---------------|-------------------------------------------|---------------|---------------------|-----------|--------|-------------|---------------|-------------|-----------------------------------------------------------------------------------------------------------------------------------------------------------------------------------------------------------------------|------------------------------------------------------------------------------------------------------------------------------------------------|-----------|
|               | Observational Study                       |               | follow up 5.1 years |           |        |             |               |             | hr/week: 0.91 (0.80, 1.03);<br>7.5-13.9 MET<br>hr/week: 0.80 (0.70, 0.91);<br>14.0-23.4 MET<br>hr/week: 0.86 (0.75, 0.99);<br>23.5-143.0 MET<br>hr/week: 0.78 (0.67, 0.91)                                            | Smoking, Hypertension, Hypercholesterolemia, Dietary Fiber, Percent Energy from Carbohydrates                                                  |           |
| Hu (1999)     | Nurses' Health Study                      | United States | 1986-1994           | 40-65     | Female | 70102       | Recreation    | RR          | 0-2.0 MET<br>hr/week: 1.00;<br>2.1-4.6 MET<br>hr/week: 0.84 (0.72, 0.97);<br>4.7-10.4 MET<br>hr/week: 0.87 (0.75, 1.02);<br>10.5-21.7 MET<br>hr/week: 0.77 (0.65, 0.91);<br>≥21.8 MET<br>hr/week: 0.74 (0.62, 0.89)   | Age, Time Period, Cigarette Smoking, Menopausal Status, Parental History of Diabetes, Alcohol Consumption, Hypertension, High Cholesterol, BMI | 6         |
| Hu (2001)     | The Health Professionals' Follow-up Study | United States | 1986-1996           | 40-75     | Male   | 37918       | Recreation    | RR          | 0-5.9 MET<br>hr/week: 1.00;<br>6.0-13.7 MET<br>hr/week: 0.88 (0.71, 1.10);<br>13.8-24.2 MET<br>hr/week: 0.75 (0.60, 0.94);<br>24.3-40.8 MET<br>hr/week: 0.69 (0.54, 0.87);<br>≥40.9 MET<br>hr/week: 0.57 (0.44, 0.74) | Excluding First 2 Years Of Follow-Up, Age, Pack-Years Smoking, Parental Family History of Diabetes, Alcohol Intake, Vit E Supplement Use       | 7         |

| Author (Year)   | Study Name                                                                                            | Country        | Time Period                            | Age Range | Sex  | Sample Size | Activity Type                                           | Effect Type | Effect                                                                                                                                                                                                                                   | Covariates adjusted                                                     | NOS score |
|-----------------|-------------------------------------------------------------------------------------------------------|----------------|----------------------------------------|-----------|------|-------------|---------------------------------------------------------|-------------|------------------------------------------------------------------------------------------------------------------------------------------------------------------------------------------------------------------------------------------|-------------------------------------------------------------------------|-----------|
| Hu (2003)       | Study in two Eastern provinces and in a region in Southwestern Finland plus the Helsinki capital area | Finland        | 1982-1998<br>Mean follow-up 8 years.   | 35-64     | Both | 14290       | Occupational<br><br><br>Commuting<br><br><br>Recreation | HR          | Light: 1.00<br>Moderate: 0.60 (0.45, 0.81);<br>Active: 0.68 (0.53, 0.87)<br><br>0 Min: 1.00;<br>1-29 Min: 0.80 (0.62, 1.03);<br>>=30 Min: 0.47 (0.33, 0.66)<br><br>Low: 1.00;<br>Moderate: 0.65 (0.52, 0.82);<br>High: 0.59 (0.40, 0.87) | Age, Sex, Study Year, SBP, Smoking, Education                           | 7         |
| James (1998)    | The Pitt County Study in North Carolina                                                               | United States  | 1988-1993                              | 25-50     | Both | 916         | Recreation+ Occupational+Housework                      | OR          | Inactive: 1.00<br>Low: 0.51 (0.20, 1.28);<br>Moderate: 0.35 (0.12, 0.98);<br>Strenuous: 0.65 (0.26, 1.63)                                                                                                                                | Age, Sex, Education, BMI, Waist-To-Hip Ratio                            | 5         |
| Jefferis (2012) | A cohort based in general practices in 24 British towns                                               | United Kingdom | 1996-2000<br>Mean follow up 7.1 years. | 60-79     | Male | 2675        | Recreation                                              | HR          | None: 1.00<br>Occasional: 0.73 (0.41, 1.31); Light: 0.49 (0.25, 0.95);<br>Moderate: 0.50 (0.25, 1.01);<br>Moderately                                                                                                                     | Age, Region, Social Class (Nonmanual, Manual, or Armed forces), Smoking | 6         |

| Author (Year)    | Study Name   | Country | Time Period                               | Age Range | Sex                | Sample Size        | Activity Type | Effect Type | Effect                                                                                                                                                       | Covariates adjusted                                                                                                                                                                                                                                                                    | NOS score |
|------------------|--------------|---------|-------------------------------------------|-----------|--------------------|--------------------|---------------|-------------|--------------------------------------------------------------------------------------------------------------------------------------------------------------|----------------------------------------------------------------------------------------------------------------------------------------------------------------------------------------------------------------------------------------------------------------------------------------|-----------|
|                  |              |         |                                           |           |                    |                    |               |             | Vigorous: 0.58 (0.29, 1.16);<br>Vigorous: 0.48 (0.23, 1.02)                                                                                                  | History (Nonsmoker or Current Smoker); Alcohol Intake (none/occasional, 1–15 units/week, or ≥16 units/week), Coffee (0, 1–3, or ≥4 cups/day), Total kcal/day, Dietary fiber (g)/day, Protein (g)/day, and Carbohydrate (g)/day, total Cholesterol, HDL Cholesterol, Triglycerides, BMI |           |
| Joseph (2010)    | Tromsø Study | Norway  | 1994-2005<br>Median follow up 10.8 years. | 25-98     | Male<br><br>Female | 12431<br><br>13737 | Recreation    | HR          | Inactive: 1.69 (1.12, 2.55);<br>Moderate: 1.03 (0.68, 1.55);<br>Hard: 1.00<br><br>Inactive: 1.13 (0.69, 1.83);<br>Moderate: 0.81 (0.49, 1.35);<br>Hard: 1.00 | Age, BMI, Total Cholesterol, Triglycerides, HDL Cholesterol, Hypertension, Family History, Education, and Smoking                                                                                                                                                                      | 8         |
| Koloverou (2014) | ATTICA study | Greece  | 2002-2012                                 | rathm     | Both               | 1485               | Total         | OR          | Inactive: 1.00;<br>Physically Active:                                                                                                                        | Age, Sex, Years of                                                                                                                                                                                                                                                                     | 8         |

| Author (Year)    | Study Name                     | Country       | Time Period | Age Range | Sex    | Sample Size | Activity Type | Effect Type | Effect                                                                                                                                                                           | Covariates adjusted                                                                                                                                                                 | NOS score |
|------------------|--------------------------------|---------------|-------------|-----------|--------|-------------|---------------|-------------|----------------------------------------------------------------------------------------------------------------------------------------------------------------------------------|-------------------------------------------------------------------------------------------------------------------------------------------------------------------------------------|-----------|
|                  |                                |               |             |           |        |             |               |             | 0.51 (0.24, 1.10)                                                                                                                                                                | School, Smokers vs. Non-Smokers, Family History of Diabetes, Energy Intake, Abnormal Waist Height Ratio, Fasting Blood Glucose, Hypercholesterolemia, and Hypertension              |           |
| Krishnan (2008)  | The Black Women's Health Study | United States | 1995-2005   | 21-69     | Female | 45668       | Recreation    | HR          | 0 hr/wk: 1.00;<br><1 hr/wk: 0.90 (0.82, 0.99);<br>1-2 hr/wk: 0.77 (0.69, 0.85);<br>3-4 hr/wk: 0.53 (0.45, 0.63);<br>5-6 hr/wk: 0.49 (0.38, 0.64);<br>≥7 hr/wk: 0.43 (0.31, 0.59) | Age, Time Period, Family History of Diabetes, Years of Education, Family Income, Marital Status, Cigarette Use, Alcohol Use, Energy Intake, Coffee Consumption, Television Watching | 6         |
| Laaksonen (2010) | Mini-Finland Health Survey     | Finland       | 1978-1988   | 40-79     | Both   | 4517        | Recreation    | RR          | No Exercise: 1.00;<br>Occasional or Regular Exercise: 0.72 (0.52, 1.01)                                                                                                          | Age, Sex                                                                                                                                                                            | 6         |



| Author (Year)       | Study Name                                                                                      | Country                          | Time Period                           | Age Range | Sex    | Sample Size | Activity Type             | Effect Type | Effect                                                                                                                       | Covariates adjusted                                                                                                                                     | NOS score |
|---------------------|-------------------------------------------------------------------------------------------------|----------------------------------|---------------------------------------|-----------|--------|-------------|---------------------------|-------------|------------------------------------------------------------------------------------------------------------------------------|---------------------------------------------------------------------------------------------------------------------------------------------------------|-----------|
|                     | Health 2000 Survey                                                                              |                                  | 2000-2007                             | 40-79     | Both   | 4110        | Recreation                |             | No Exercise: 1.00; Occasional or Regular Exercise: 0.65 (0.40, 1.03)                                                         |                                                                                                                                                         |           |
| Lee (2012)          | Individuals were selected from the database of the National Health Insurance Corporation (NHIC) | South Korea                      | 1996-2005. Mean follow up 7.5 years   | 18+       | Male   | 675496      | Recreation                | HR          | 0 min/week: 1.00; 1-149 min/week: 0.95 (0.93, 0.97); 150-299 min/week: 0.90 (0.87, 0.93); ≥ 300 min/week: 0.91 (0.88, 0.94)  | Age, Smoking Status, Alcohol Intake, Hypertension, Parental Diabetes, Baseline Glucose, BMI                                                             | 8         |
| Longo-Mbenza (2009) | A prospective cohort of non-diabetic Central Africans                                           | Democratic Republic Of The Congo | 2004-2008 Median follow-up 50 months. | ≥40 years | Both   | 807         | Recreation and Occupation | HR          | Unexposed to Physical Inactivity: 1.0; Exposed to Physical Inactivity: 3.5 (1.2, 10.7)                                       | Waist Circumference, Systolic BP, Sex, Diabetes, Heredity, Malnutrition, Environment, Psychosocial (Stress), Lifestyle, and Westernisation Risk Factors | 6         |
| Lucke (2007)        | Australian Longitudinal Study on Women's Health                                                 | Australia                        | 1996-2003                             | 18-75     | Female | 40395       | Total                     | RR          | Nil/Low: 1.07 (0.70, 1.64); Moderate/High: 1.00                                                                              | BMI, Smoking, Alcohol, Education                                                                                                                        | 5         |
| Magliano (2008)     | The Australian Diabetes, Obesity and Lifestyle Study                                            | Australia                        | 1999-2005 Mean follow up 3 years.     | ≥25 years | Both   | 5842        | Recreation                | OR          | Inactive (0 Min/Week): 1.56 (1.12, 2.18); Insufficient (1-149 Min/Week): 1.51 (1.01, 2.25); Sufficient (≥150 Min/Week): 1.00 | Age, Female Sex, Waist Circumference, Smoking Status, Education, Hypertension,                                                                          | 8         |

| Author (Year)    | Study Name                            | Country       | Time Period                            | Age Range | Sex            | Sample Size                   | Activity Type | Effect Type | Effect                                                                                                                                                                                                | Covariates adjusted                                                                               | NOS score |
|------------------|---------------------------------------|---------------|----------------------------------------|-----------|----------------|-------------------------------|---------------|-------------|-------------------------------------------------------------------------------------------------------------------------------------------------------------------------------------------------------|---------------------------------------------------------------------------------------------------|-----------|
|                  |                                       |               |                                        |           |                |                               |               |             | Min/Week): 1.00                                                                                                                                                                                       | Family History of Diabetes, Log FPG, Hypertriglyceridemia, Low HDL Cholesterol, Total Cholesterol |           |
| Manson (1991)    | Nurses' Health Study                  | United States | 1980-1988                              | 34-59     | Female         | 87253                         | Recreation    | RR          | Frequency of Vigorous Exercise:<br>0 Times/Week: 1.00;<br>1 Time/Week: 0.89 (0.72, 1.11);<br>2 Times/Week: 0.71 (0.56, 0.89);<br>3 Times/Week: 0.93 (0.75, 1.16);<br>4+ Times/Week: 0.86 (0.71, 1.04) | Age, BMI                                                                                          | 5         |
| Manson (1992)    | The Physician's Health Study          | United States | 1982-1988. Mean follow up 60.2 months. | 40-84     | Male           | 21271                         | Recreation    | RR          | Frequency of Vigorous Exercise:<br>0 Times/Week: 1.00;<br>1 Time/Week: 0.78 (0.56, 1.09);<br>2-4 Times/Week: 0.68 (0.51, 0.90);<br>≥5 Times/Week: 0.71 (0.49, 1.03)                                   | Age, BMI                                                                                          | 4         |
| Meisinger (2005) | The MONICA/KORA Augsburg Cohort Study | Germany       | 1984-1998. Mean follow up 7.4 years.   | 25-74     | Male<br>Female | 4069 (males)<br>4034 (female) | Recreation    | HR          | Males:<br>No Activity: 1.00<br>Low: 0.91 (0.61, 1.38);<br>Moderate: 0.76 (0.47, 1.25);<br>High: 0.83 (0.50, 1.36)                                                                                     | Age, Survey, Actual Hypertension, Dyslipidaemia, Parental History of Diabetes, Regular            | 8         |

| Author (Year)       | Study Name                  | Country       | Time Period    | Age Range | Sex  | Sample Size | Activity Type         | Effect Type | Effect                                                                                                                                   | Covariates adjusted                                                                                    | NOS score |
|---------------------|-----------------------------|---------------|----------------|-----------|------|-------------|-----------------------|-------------|------------------------------------------------------------------------------------------------------------------------------------------|--------------------------------------------------------------------------------------------------------|-----------|
|                     |                             |               |                |           |      |             |                       |             | Females:<br>No Activity: 1.0<br>Low: 0.87 (0.52, 1.45);<br>Moderate: 0.70 (0.37, 1.33);<br>High: 0.24 (0.06, 0.98)                       | Smoking, Alcohol Intake, Education, BMI                                                                |           |
| Mozaffarian (2009)  | Cardiovascular Health Study | United States | 1989-1998      | 65+       | Both | 4883        | Total daily activity  | HR          | < Median: 1.00;<br>≥ Median: 0.74 (0.58, 0.93)                                                                                           | Age, Sex, Race, Educational Level, Annual Income, Diet, Smoking, Alcohol use, BMI, waist circumference | 7         |
| Okada (2000)        | The Osaka Health Survey     | Japan         | 1981-1997      | 35-60     | Male | 6013        | Recreation+ Housework | RR          | Frequency of regular physical activity:<br>0 Times/Week: 1.00;<br>1-2 Times/Week: 0.80 (0.64, 0.99);<br>≥3 Times/Week: 0.55 (0.34, 0.87) | Age, BMI, Alcohol, Smoking, Blood Pressure, Parental History of Type 2 Diabetes                        | 7         |
| Panagiotakos (2008) | The ATTICA study            | Greece        | 2001-2006      | 18+       | Both | 1806        | Total                 | OR          | Inactive: 1.00;<br>Active: 0.62 (0.35, 1.02)                                                                                             | Age, Waist Circumference, Fasting Blood Glucose, Family History of Diabetes                            | 7         |
| Rathmann (2009)     | KORA S4/F4 cohort study     | Germany       | 1999-2008 Mean | 55-74     | Both | 887         | Recreation            | OR          | Inactive During Leisure Time: 1.3 (0.8, 2.0);                                                                                            | Age, Sex                                                                                               | 5         |

| Author (Year) | Study Name                                                      | Country       | Time Period            | Age Range | Sex  | Sample Size | Activity Type | Effect Type | Effect                                                                                                                                                                                     | Covariates adjusted                                                                                                                                                          | NOS score |
|---------------|-----------------------------------------------------------------|---------------|------------------------|-----------|------|-------------|---------------|-------------|--------------------------------------------------------------------------------------------------------------------------------------------------------------------------------------------|------------------------------------------------------------------------------------------------------------------------------------------------------------------------------|-----------|
|               |                                                                 |               | follow up 4.5 years.   |           |      |             |               |             | Active During Leisure Time: 1.0                                                                                                                                                            |                                                                                                                                                                              |           |
| Reis (2011)   | National Institutes of Health (NIH)-AARP Diet and Health Study. | United States | 1995-2006<br>1999-2008 | 50-71     | Male | 114996      | Total         | OR          | Regular Physical Activity? No: 1.00;<br>Regular Physical Activity? Yes: 0.76 (0.73, 0.79)<br><br>Regular Physical Activity? No: 1.00;<br>Regular Physical Activity? Yes: 0.77 (0.73, 0.82) | Age, Race/Ethnicity, Educational Attainment, Marital Status, BMI, Diet Score, Smoking, Moderate Alcohol Consumption, Use of Hormone Replacement (for women)                  | 6         |
| Shi (2013)    | Shanghai Men's Health Study (SMHS)                              | China         | 2002-2011              | 40-74     | Male | 51464       | Recreation    | HR          | None: 1.00;<br><1.2 MET hr/week: 0.80 (0.65, 0.97);<br>1.2-3.0 MET hr/week: 0.89 (0.74, 1.07);<br>≥3.0 MET hr/week: 0.91 (0.76, 1.08)                                                      | Age at Interview, Energy Intake, Smoking, Alcohol Consumption, Education Level, Occupation, Income Level, Hypertension, Family History of Diabetes, BMI, and Waist Hip ratio | 8         |
| Siegel (2009) | Physicians' Health                                              | United States | 1982-2006              | 40-84     | Male | 20757       | Recreation    | HR          | Rarely/Never: 1.00;                                                                                                                                                                        | Age, Alcohol Use, Smoking                                                                                                                                                    | 5         |



| Author (Year) | Study Name | Country | Time Period | Age Range | Sex    | Sample Size | Activity Type  | Effect Type | Effect                                                                                                                                                                                | Covariates adjusted | NOS score |
|---------------|------------|---------|-------------|-----------|--------|-------------|----------------|-------------|---------------------------------------------------------------------------------------------------------------------------------------------------------------------------------------|---------------------|-----------|
|               |            |         |             |           |        |             |                |             | Strenuous Sport H/Wk, 2-3: 0.85 (0.77, 0.94);<br>Strenuous Sport H/Wk, 4+: 0.80 (0.72, 0.88)                                                                                          |                     |           |
|               |            |         |             |           |        |             | Transportation |             | Vigorous Work H/Wk, Never: 1.00;<br>Vigorous Work H/Wk, 1/2-1: 0.91 (0.85, 0.98);<br>Vigorous Work H/Wk, 2-3: 0.91 (0.83, 1.00);<br>Vigorous Work H/Wk, 4+: 0.84 (0.77, 0.92)         |                     |           |
|               |            |         |             |           | Female | 38937       | Recreation     |             | Strenuous Sport H/Wk, Never: 1.00;<br>Strenuous Sport H/Wk, 1/2-1: 1.00 (0.91, 1.09);<br>Strenuous Sport H/Wk, 2-3: 0.85 (0.75, 0.96);<br>Strenuous Sport H/Wk, 4+: 0.67 (0.57, 0.79) |                     |           |
|               |            |         |             |           |        |             | Transportation |             | Vigorous Work H/Wk, Never: 1.00;<br>Vigorous Work H/Wk, 1/2-1: 1.03 (0.95, 1.12);<br>Vigorous Work                                                                                    |                     |           |

| Author (Year)     | Study Name                                                               | Country        | Time Period                             | Age Range | Sex  | Sample Size | Activity Type | Effect Type | Effect                                                                                        | Covariates adjusted                                                                                                                                                        | NOS score |
|-------------------|--------------------------------------------------------------------------|----------------|-----------------------------------------|-----------|------|-------------|---------------|-------------|-----------------------------------------------------------------------------------------------|----------------------------------------------------------------------------------------------------------------------------------------------------------------------------|-----------|
|                   |                                                                          |                |                                         |           |      |             |               |             | H/Wk, 2-3: 0.99 (0.87, 1.13);<br>Vigorous Work<br>H/Wk, 4+: 0.91 (0.78, 1.06)                 |                                                                                                                                                                            |           |
| Stringhini (2012) | Whitehall II study                                                       | United Kingdom | 1991-2009<br>Mean follow up 14.2 years. | 35-55     | Both | 7237        | Total         | HR          | Inactive: 1.33 (1.13, 1.56);<br>Moderately Active : 1.25 (1.04, 1.50);<br>Active: 1.00        | Age, Sex, Ethnicity.                                                                                                                                                       | 4         |
| Sun (2009)        | Taiwan MJ Longitudinal health-check-up-based Population Database (MJLPD) | Taiwan         | 1998-2006                               | 35-74     | Both | 73961       | Recreation    | HR          | Sport Time, Seldom: 1.00;<br>Sport Time $\geq$ 1H/Wk: 1.11 (1.01, 1.23)                       | Sex, Education, Age, Family History of Type 2 Diabetes, Current Smoking, Hypertension, BMI, WC, FPG                                                                        | 7         |
| Tsai (2015)       | Taiwan Longitudinal Survey on Aging (TLSA)                               | Taiwan         | 1999-2003                               | 53-99     | Both | 2995        | Recreation    | OR          | Inactive: 1.00;<br>Moderate: 0.95 (0.56, 1.58);<br>Physical Activity, High: 0.59 (0.43, 0.80) | Sex, age, formal education(year), smoking, alcohol drinking, betel quid chewing, BMI, Instrumental activities of daily living, Hypertension, Heart Disease, Chronic Kidney | 6         |

| Author (Year)   | Study Name                                                                                                     | Country | Time Period                    | Age Range | Sex                | Sample Size                        | Activity Type         | Effect Type | Effect                                                                                                                                       | Covariates adjusted                                                          | NOS score |
|-----------------|----------------------------------------------------------------------------------------------------------------|---------|--------------------------------|-----------|--------------------|------------------------------------|-----------------------|-------------|----------------------------------------------------------------------------------------------------------------------------------------------|------------------------------------------------------------------------------|-----------|
|                 |                                                                                                                |         |                                |           |                    |                                    |                       |             |                                                                                                                                              | Disease, Gout, Center for Epidemiologic Studies, Depression Scale            |           |
| Villegas (2006) | The Shanghai Women's Health Study (SWHS)                                                                       | China   | 1997-2004. Follow up 4.6 years | 40-70     | Female             | 64130                              | Recreation            | RR          | 0 MET hr/Day: 1.00;<br><0.8 MET hr/Day: 0.89 (0.76, 1.03);<br>0.8-1.99 MET hr/Day: 0.99 (0.85, 1.15);<br>>1.99 MET hr/Day: 0.83 (0.70, 0.97) | Age, Kcal/Day, Education, Income, Occupation, Smoking, Alcohol, Hypertension | 7         |
| Waki (2005)     | Japan Public Health Center-based prospective study on cancer and cardiovascular diseases (JPHC Study) Cohort I | Japan   | 1990-2000                      | 40-59     | Male<br><br>Female | 12913<br><br>15980                 | Recreation            | OR          | Inactive: 1.00;<br>Active: 0.90 (0.73, 1.12)<br><br>Inactive: 1.0<br>Active: 1.06 (0.82, 1.37)                                               | Age, BMI, Smoking Status, Alcohol Intake, Family History, Hypertension       | 6         |
| Waller (2010)   | The Finnish Twin Cohort                                                                                        | Finland | 1976-2004                      | 18+       | Male<br><br>Female | 9842 (males)<br><br>10645(females) | Recreation+ Commuting | HR          | Males:<br><0.59 MET hr/Day: 1.00;<br>≥0.59 MET hr/Day: 0.49 (0.27, 0.87)<br><br>Females:                                                     | BMI                                                                          | 7         |



| Author (Year)      | Study Name                       | Country        | Time Period                              | Age Range | Sex    | Sample Size | Activity Type         | Effect Type | Effect                                                                                                                                                            | Covariates adjusted                                                                                                                                                           | NOS score |
|--------------------|----------------------------------|----------------|------------------------------------------|-----------|--------|-------------|-----------------------|-------------|-------------------------------------------------------------------------------------------------------------------------------------------------------------------|-------------------------------------------------------------------------------------------------------------------------------------------------------------------------------|-----------|
|                    |                                  |                |                                          |           |        |             |                       |             | <0.59 MET<br>hr/Day: 1.00;<br>≥0.59 MET<br>Hr/Day: 0.59 (0.36,<br>0.96)                                                                                           |                                                                                                                                                                               |           |
| Wannamethee (2000) | The British regional heart study | United Kingdom | 1978-1995.<br>Mean follow up 16.8 years. | 40-59     | Male   | 5159        | Recreation+ Commuting | RR          | Inactive: 1.00;<br>Occasional: 0.81 (0.51, 1.29);<br>Light: 0.86 (0.54, 1.41)<br>Moderate: 0.66 (0.38, 1.17);<br>Moderately Vigorous/Vigorous : 0.69 (0.39, 1.22) | Age, Smoking, Alcohol, Social Class, BMI, Preexisting CHD, Insulin, Diastolic Blood Pressure, Triglyceride, HDL Cholesterol, Gamma-Glutamyltransferase                        | 8         |
| Weinstein (2004)   | Women's Health Study (WHS)       | United States  | 1992-1999.<br>Mean follow up 6.9 years   | 45+       | Female | 37878       | Recreation            | HR          | 0-199 kcal/week: 1.00;<br>200-599 kcal/week: 0.91 (0.79, 1.06);<br>600-1499 kcal/week: 0.86 (0.74, 1.01);<br>≥1500 kcal/week: 0.82 (0.70, .97)                    | Age, Family History of Diabetes, Alcohol, Smoking, Hormone Therapy Use, Hypertension, High Cholesterol, Dietary Factors, Randomized Women's Health Study Treatment Group, BMI | 7         |
| Williams (2013)    | National Runners'                | United States  | 1998-2006                                |           | Both   | 33060       | Recreation            | HR          | Running, <1: 1.00;<br>Running, 1-2:                                                                                                                               | Age, Sex, Race,                                                                                                                                                               | 4         |

| Author (Year) | Study Name                                             | Country | Time Period                       | Age Range | Sex  | Sample Size | Activity Type | Effect Type | Effect                                                                                                                                                                                                                       | Covariates adjusted                                                                                                                                                    | NOS score |
|---------------|--------------------------------------------------------|---------|-----------------------------------|-----------|------|-------------|---------------|-------------|------------------------------------------------------------------------------------------------------------------------------------------------------------------------------------------------------------------------------|------------------------------------------------------------------------------------------------------------------------------------------------------------------------|-----------|
|               | Health Study II and the National Walkers' Health Study |         |                                   |           |      |             |               |             | 0.57(0.38, 0.87);<br>Running, 2-3: 0.55(0.35,0.87);<br>Running, 3-4: 0.52 (0.33, 0.82)<br>Running, >= 4: 0.31 (0.17, 0.54)<br><br>Walking, <1: 1.00;<br>Walking, 1-2: 0.65 (0.53, 0.81);<br>Walking, 2-3: 0.55 (0.38, 0.78); | Smoking, Prior Coronary Heart Disease, Intakes of Red Meat, Fruit, Alcohol                                                                                             |           |
| Xu (2014)     | Two community-based prospective cohort studies         | China   | 2004-2010 Mean follow up 3 years. | 35-100    | Both | 5659        | Total         | OR          | Insufficient: 1.00;<br>Sufficient: 0.43 (0.27, 0.68)                                                                                                                                                                         | Age, Gender, Educational Attainment, Family History, Hypertension, Body Weight Status, Cigarette Smoking, Alcohol Drinking, TV Viewing, Vegetables Intake, Meat Intake | 7         |

**Table D.** Characteristics and quality assessment of studies included in the meta-regression analysis for the association between physical activity and ischemic heart disease

| Author (Year)    | Study Name                                                      | Country        | Time Period                         | Age Range | Sex    | Sample Size | Activity Type                | Effect Type | Effect                                                                                                                                                         | Covariates adjusted                                                                                                                                                                                  | NOS score |
|------------------|-----------------------------------------------------------------|----------------|-------------------------------------|-----------|--------|-------------|------------------------------|-------------|----------------------------------------------------------------------------------------------------------------------------------------------------------------|------------------------------------------------------------------------------------------------------------------------------------------------------------------------------------------------------|-----------|
| Akesson (2007)   | Swedish Mammography Cohort linked to Swedish Hospital Discharge | Sweden         | 1997-2003. Mean follow up 6.2 years | 48-83     | Female | 24444       | Recreation                   | RR          | <1 Hr/Week: 1.40 (1.10, 1.47);<br>≥ 1Hr/Week: 1.00                                                                                                             | Age, Education, Family History of MI, High Cholesterol, Hypertension, Use of Hormone Therapy, Use of Aspirin, Total Energy Intake, Healthy And Alcohol Dietary Patterns, Smoking, Waist To Hip Ratio | 8         |
| Allesoe (2014)   | Danish Nurse Cohort Study                                       | Denmark        | 1993-2008 Mean follow up 7.5 years. | 45-64     | Female | 12093       | Occupation<br><br>Recreation | HR          | Sedentary: 1.13 (0.86, 1.49); Moderate: 1.00<br>Vigorous: 1.34 (1.08, 1.66)<br><br>Sedentary: 1.50 (1.04, 2.16); Moderate: 1.12 (0.96, 1.45);<br>Vigorous: 1.0 | Age, Family History of IHD, Diabetes, BMI, Smoking, Alcohol Consumption, Work Pressure, Job Influence, Shift Work, Work Hours Per Week                                                               | 6         |
| Armstrong (2015) | the Million Women Study                                         | United Kingdom | 1998-. Mean follow up 9             | 50-64     | Female | 1119239     | total                        | RR          | 0-40 Per Week: 1 (0.98, 1.03);<br>> 40-80 Per Week: 0.92 (0.90, 0.94);                                                                                         | BMI by Age, Smoking-by Age, Alcohol-By-Age,                                                                                                                                                          | 7         |

| Author (Year)  | Study Name                                            | Country        | Time Period                     | Age Range | Sex  | Sample Size | Activity Type         | Effect Type | Effect                                                                                                                                                                                                                  | Covariates adjusted                                                                                                                                         | NOS score |
|----------------|-------------------------------------------------------|----------------|---------------------------------|-----------|------|-------------|-----------------------|-------------|-------------------------------------------------------------------------------------------------------------------------------------------------------------------------------------------------------------------------|-------------------------------------------------------------------------------------------------------------------------------------------------------------|-----------|
|                |                                                       |                | years                           |           |      |             |                       |             | > 80 Per Week : 0.96 (0.93, 0.98)                                                                                                                                                                                       | Stratified by SES and Region                                                                                                                                |           |
| Batty (2002)   | Whitehall study                                       | United Kingdom | 1967-1995                       | 40-64     | Male | 6408        | Recreation            | RR          | Inactive: 1.08 (0.90, 1.30);<br>Moderate: 0.94 (0.80, 1.10);<br>Active: 1.00                                                                                                                                            | Excluding deaths in first five years of follow up, Age, Employment Grade, Systolic BP, Cholesterol, Smoking, BMI, FEV in One Second, Disease At Study Entry | 5         |
| Bijnen (1998)  | The Zutphen Study                                     | Netherlands    | 1985-1995                       | 64-84     | Male | 802         | Recreation+ Commuting | RR          | Lowest Tertile: 1.00; Middle Tertile: 0.63 (0.38, 1.05); Highest Tertile: 0.85 (0.51, 1.44)                                                                                                                             | Age, Baseline CHD, Smoking, Alcohol                                                                                                                         | 5         |
| Calling (2006) | The Malmo Diet and Cancer Study                       | Sweden         | 1991-. Mean follow up 7.6 years | 45-73     | Both | 26942       | recreation            | RR          | Low Active: 1.00; Active: 0.66 (0.57, 0.77)                                                                                                                                                                             | Age, Sex                                                                                                                                                    | 5         |
| Chen (1999)    | Statistics Canada's National Population Health Survey | Canada         | 1994-1997                       | 20+       | Both | 7158        | Recreation            | OR          | Sedentary (Irregular Physical Activity): 5.00 (1.84, 13.59);<br>Light (<1.5 Kcal/Kg/Day During Regular Physical Exercise): 3.7 (1.26, 10.67);<br>Moderate (1.5-2.9 Kcal/Kg/Day During Regular Physical Activity): 1.00; | Age, Sex, Education, Household Income, Activity Limitation, Smoking, High Blood Pressure, BMI                                                               | 6         |

| Author (Year)    | Study Name                                    | Country       | Time Period | Age Range | Sex    | Sample Size | Activity Type | Effect Type | Effect                                                                                                                                                                                                     | Covariates adjusted                                                                                                                                                                                                                                           | NOS score |
|------------------|-----------------------------------------------|---------------|-------------|-----------|--------|-------------|---------------|-------------|------------------------------------------------------------------------------------------------------------------------------------------------------------------------------------------------------------|---------------------------------------------------------------------------------------------------------------------------------------------------------------------------------------------------------------------------------------------------------------|-----------|
|                  |                                               |               |             |           |        |             |               |             | Active (3 Kcal/Kg/Day During Regular Physical Activity): 1.3; (0.41, 3.89)                                                                                                                                 |                                                                                                                                                                                                                                                               |           |
| Chiuvè (2006)    | Health Professionals Follow-up Study          | United States | 1986-2002   | 40-75     | Male   | 42847       | Recreation    | RR          | Moderate to Vigorous exercise:<br>0 hr/week: 1.22 (1.06, 1.40);<br>0.1-1.5 hr/week: 1.05 (0.90, 1.24);<br>1.5-3.5 hr/week: 1.08 (0.92, 1.27);<br>3.5-6.0 hr/week: 0.92 (0.79, 1.11);<br>≥6.0 hr/week: 1.00 | Age, Family History of MI Before 60, Aspirin, Anti-hypertensives, Hypercholesterolemia, Hypertension, Other Lifestyle Factors                                                                                                                                 | 7         |
| Chomistek (2013) | Women's Health Initiative Observational Study | United States | 1994-2010   | 50-79     | Female | 71018       | Recreation    | HR          | Inactive: 1.43 (1.25, 1.63);<br>Low: 1.28 (1.13, 1.45);<br>Medium: 1.20 (1.06, 1.36);<br>High: 1.00                                                                                                        | Age, Sedentary Time, Race, Education, Income, Marital Status, Smoking, Family History of MI, Depression, Alcohol Intake, Hours of Sleep, Intake of Total Calories, Saturated Fat, Fiber, BMI, History of Hypertension, Diabetes, High Cholesterol at Baseline | 8         |

| Author (Year)  | Study Name                                                                                       | Country       | Time Period                           | Age Range | Sex                | Sample Size                        | Activity Type                                | Effect Type | Effect                                                                                                                                                                                                                                                   | Covariates adjusted                                                                                                                                  | NOS score |
|----------------|--------------------------------------------------------------------------------------------------|---------------|---------------------------------------|-----------|--------------------|------------------------------------|----------------------------------------------|-------------|----------------------------------------------------------------------------------------------------------------------------------------------------------------------------------------------------------------------------------------------------------|------------------------------------------------------------------------------------------------------------------------------------------------------|-----------|
| Donahue (1988) | The Honolulu Heart Program                                                                       | United States | 1965-. .                              | 45-65     | Male               | 7221                               | Total                                        | RR          | Inactive: 1.00<br>Active: 0.69(0.53, 0.88)                                                                                                                                                                                                               | Age, Alcohol Intake, Cigarette Use                                                                                                                   | 6         |
|                |                                                                                                  |               |                                       | 65-69     | Male               | 423                                | Total                                        |             | Inactive: 1.00<br>Active: 0.43(0.19, 0.99)                                                                                                                                                                                                               |                                                                                                                                                      |           |
| Eaton (1995)   | Cohort Analytic Study of Israeli government employees (The Israeli Ischemic Heart Disease Study) | Israel        | 1963-1986. Mean follow-up 11.5 years. | 40+       | Male               | 8463                               | Recreation+C<br>ommuting<br><br>Occupational | RR          | Sedentary: 1.00;<br>Light: 0.79 (0.63, 0.99);<br>Light Daily: 0.73 (0.59, 0.89);<br>Heavy: 0.71 (0.52, 0.98)<br><br>Sitting: 1.00;<br>Standing: 0.99 (0.75, 1.18);<br>Walking: 0.94 (0.78, 1.12);<br>Physical Labor: 0.87 (0.67, 1.10)                   | Age                                                                                                                                                  | 7         |
| Folsom (1997)  | The ARIC study                                                                                   | United States | 1987-1995                             | 45-64     | Male<br><br>Female | 6188 (males)<br><br>7852 (females) | Recreation                                   | RR          | Males:<br>Quartile 1 (Low): 1.00;<br>Quartile 2: 1.15 (0.79, 1.68);<br>Quartile 3: 1.03 (0.68, 1.54);<br>Quartile 4 (High): 0.83 (0.56, 1.23)<br>Females:<br>Quartile 1 (Low): 1.00;<br>Quartile 2: 0.99 (0.58, 1.67);<br>Quartile 3: 0.64 (0.32, 1.27); | Age, Education Level, Smoking, Alcohol, Diabetes, Waist/Hip Ratio, Total Cholesterol, HDL-Cholesterol, Systolic BP, Antihypertensive Medication Use, | 8         |

| Author (Year)   | Study Name                                                                                        | Country | Time Period                         | Age Range | Sex  | Sample Size                  | Activity Type                  | Effect Type | Effect                                                                                                                                                                                                                                                                                       | Covariates adjusted                                                                 | NOS score |
|-----------------|---------------------------------------------------------------------------------------------------|---------|-------------------------------------|-----------|------|------------------------------|--------------------------------|-------------|----------------------------------------------------------------------------------------------------------------------------------------------------------------------------------------------------------------------------------------------------------------------------------------------|-------------------------------------------------------------------------------------|-----------|
|                 |                                                                                                   |         |                                     |           |      |                              |                                |             | Quartile 4 (High): 0.72 (0.37, 1.38)                                                                                                                                                                                                                                                         | Fibrinogen, Race, Aric Field Center + Hormone Replacement Therapy for Females       |           |
| Gulsvik (2012)  | The Bergen Clinical Blood Pressure Survey                                                         | Norway  | 1965-2007. Mean follow up 21 years. | 22-75     | Both | 5653                         | recreation and transportation  | HR          | No/Low: 1.00; Moderate: 0.77 (0.66, 0.90); High: 0.66 (0.52, 0.83)                                                                                                                                                                                                                           | Age, Sex                                                                            | 6         |
| Haapanen (1997) | Census data of a medium-size industrial town and two rural municipalities in northeastern Finland | Finland | 1980-1990                           | 35-63     | Male | 842 (males)<br>963 (females) | Recreation+Household+Commuting | RR          | Males:<br>Low (0-1100 kcal/week): 1.98 (1.22, 3.23);<br>Moderate (1101-1900 kcal/week): 1.33 (0.78, 2.27);<br>High (>1900 kcal/week): 1.00<br><br>Females:<br>Low (0-900 kcal/week): 1.25 (0.72, 2.15);<br>Moderate (901-1500 kcal/week): 0.73 (0.38, 1.39);<br>High (>1500 kcal/week): 1.00 | Age, Smoking                                                                        | 5         |
| Harari (2015)   | The CORDIS Study (Cardiovascular Occupational Risk Factor Determination in Israel)                | Israel  | 1985-2007                           | 20-70     | Male | 4819                         | Occupation<br><br>Recreation   | HR          | None-To-Mild: 1.00; Moderate-To-Hard: 1.35 (0.94, 1.95)<br><br>Less or None: 1.00; 30 Min at Least Twice a Week: 0.64                                                                                                                                                                        | Age at Screening, Socioeconomic Status (Number Of People/Room), Educational Status, | 6         |

| Author (Year)     | Study Name                | Country        | Time Period | Age Range | Sex  | Sample Size | Activity Type | Effect Type | Effect                                                                                                                                                                | Covariates adjusted                                                                                                                                                                                              | NOS score |
|-------------------|---------------------------|----------------|-------------|-----------|------|-------------|---------------|-------------|-----------------------------------------------------------------------------------------------------------------------------------------------------------------------|------------------------------------------------------------------------------------------------------------------------------------------------------------------------------------------------------------------|-----------|
|                   | Study)                    |                |             |           |      |             |               |             | (0.40, 1.02)                                                                                                                                                          | Father's Country of Origin, Body Mass Index, Cholesterol, High-Density Lipoprotein Cholesterol, Hypertension, Diabetes, Smoking, Coffee Consumption, Alcohol Consumption, Maintaining a Special Diet, Shift Work |           |
| Hillsdon (2004)   | The OXCHECK study         | United Kingdom | 1989-2001   | 35-64     | Both | 7704        | Recreation    | RR          | Frequency of vigorous exercise:<br><1 time/month: 1.00;<br>1-3 times/month: 1.15 (0.42, 3.17);<br>1 time/week: 0.37 (0.12, 1.17);<br>≥2 times/week: 0.50 (0.20, 1.23) | Age, Sex, Smoking Status, Alcohol, Pre-Existing Disease, Social Class                                                                                                                                            | 6         |
| Holtermann (2012) | The Copenhagen Male Study | Denmark        | 1970-2001.  | 40-59     | Male | 4774        | Recreation    | HR          | Low: 1.00;<br>Medium: 0.73 (0.59, 0.89);<br>High: 0.62 (0.43, 0.90)                                                                                                   | Age, Lifestyle, Clinical Factors, Psychosocial Stress At Work and Leisure, Number of Work Hours and Social Class                                                                                                 | 6         |
| Hu                | Six surveys               | Finland        | 1972-       | 25-64     | Male | 22877       | Recreation    | HR          | Males:                                                                                                                                                                | Age, Study                                                                                                                                                                                                       | 7         |



| Author (Year) | Study Name                          | Country | Time Period                      | Age Range | Sex    | Sample Size     | Activity Type | Effect Type | Effect                                                                                                                                                                                                                                                                                                                                                                                                                                                                                      | Covariates adjusted                                                                | NOS score |
|---------------|-------------------------------------|---------|----------------------------------|-----------|--------|-----------------|---------------|-------------|---------------------------------------------------------------------------------------------------------------------------------------------------------------------------------------------------------------------------------------------------------------------------------------------------------------------------------------------------------------------------------------------------------------------------------------------------------------------------------------------|------------------------------------------------------------------------------------|-----------|
| (2007)        | in five geographic areas of Finland |         | 2003. Mean follow up 15.5 years. |           | Female | 24963 (females) |               |             | <p>Low: 1.00; Moderate: 0.95 (0.88, 1.02); High: 0.84 (0.74, 0.95)</p> <p>Females:<br/>Low: 1.00; Moderate: 0.84 (0.76, 0.94); High: 0.74 (0.60, 0.93)</p> <p>Males:<br/>0 Min/Day: 1.00; 1-29 Min/Day: 0.96 (0.88, 1.04); &gt;=30 Min/Day: 0.95 (0.87, 1.05)</p> <p>Females:<br/>0 Min/Day: 1.00; 1-29 Min/Day: 0.87 (0.77, 0.98); &gt;=30 Min/Day: 0.72 (0.63, 0.83)</p> <p>Males:<br/>Low: 1.00; Moderate: 0.86 (0.78, 0.96); High: 0.87 (0.81, 0.95)</p> <p>Females:<br/>Low: 1.00;</p> | Year, Education, Alcohol, Smoking, BMI, Systolic BP, Cholesterol, History Diabetes |           |
|               |                                     |         |                                  |           |        |                 | Commuting     |             |                                                                                                                                                                                                                                                                                                                                                                                                                                                                                             |                                                                                    |           |
|               |                                     |         |                                  |           |        |                 | Occupational  |             |                                                                                                                                                                                                                                                                                                                                                                                                                                                                                             |                                                                                    |           |

| Author (Year)   | Study Name                   | Country        | Time Period                        | Age Range | Sex  | Sample Size                          | Activity Type        | Effect Type | Effect                                                                                                                                                                                                                                                                                                             | Covariates adjusted                                                                                                                                                                    | NOS score |
|-----------------|------------------------------|----------------|------------------------------------|-----------|------|--------------------------------------|----------------------|-------------|--------------------------------------------------------------------------------------------------------------------------------------------------------------------------------------------------------------------------------------------------------------------------------------------------------------------|----------------------------------------------------------------------------------------------------------------------------------------------------------------------------------------|-----------|
|                 |                              |                |                                    |           |      |                                      |                      |             | Moderate: 0.71 (0.63, 0.81);<br>High: 0.77 (0.68, 0.87)                                                                                                                                                                                                                                                            |                                                                                                                                                                                        |           |
| Inoue (2008)    | The JPHC study               | Japan          | 1995-2005                          | 45-74     | Male | 39183 (males)<br><br>43851 (females) | Total daily activity | HR          | Males:<br>Lowest Quartile: 1.00;<br>Second Quartile: 0.99 (0.72, 1.36);<br>Third Quartile: 0.69 (0.48, 0.99);<br>Highest Quartile: 0.78 (0.56, 1.09)<br><br>Females:<br>Lowest Quartile: 1.00;<br>Second Quartile: 0.76 (0.66, 0.88);<br>Third Quartile: 0.65 (0.55, 0.77);<br>Highest Quartile: 0.60 (0.49, 0.72) | Age, Geographic Area, Occupation, History Of Diabetes, Smoking, Alcohol, BMI, Total Energy Intake, Leisure-Time Sports or Physical Exercise, Excluding Deaths within First Three Years | 7         |
| Jefferis (2014) | British Regional Heart Study | United Kingdom | 1996-2010. Mean follow up 7 years. | 40-59     | Male | 3320                                 | recreation           | HR          | None: 1.00;<br>Occasional: 0.53 (0.35, 0.81);<br>Light: 0.50 (0.32, 0.78);<br>Moderate: 0.57 (0.35, 0.92); Moderately Vigorous and Vigorous: 0.51 (0.33, 0.78)                                                                                                                                                     | Age, Region, Alcohol Intake, Smoking History, Plasma Vitamin C, Social Class, Total Cholesterol, High-Density Lipoprotein Cholesterol, Triglycerides, Systolic Blood Pressure, Waist   | 7         |

| Author (Year) | Study Name                                                          | Country       | Time Period                          | Age Range | Sex    | Sample Size | Activity Type        | Effect Type | Effect                                                                                                                   | Covariates adjusted                                                                                                                                                | NOS score |
|---------------|---------------------------------------------------------------------|---------------|--------------------------------------|-----------|--------|-------------|----------------------|-------------|--------------------------------------------------------------------------------------------------------------------------|--------------------------------------------------------------------------------------------------------------------------------------------------------------------|-----------|
|               |                                                                     |               |                                      |           |        |             |                      |             |                                                                                                                          | Circumference, Forced Expiratory Volume in 1 Second, Estimated Glomerular Filtration Rate, Depression, Diabetes Mellitus, N-Terminal Pro-Brain Natriuretic Peptide |           |
| Kaprio (2000) | The Finnish twin cohort                                             | Finland       | 1975-1995                            | 25-69     | Male   | 8205        | Recreation+Commuting | RR          | Sedentary: 1.00; Occasional Exercisers: 0.84 (0.70, 1.01); Conditioning Exercisers: 0.68 (0.50, 0.92)                    | Age, BMI, Smoking, Hypertension, Diabetes                                                                                                                          | 7         |
| Lakka (1994)  | The Kuopio Ischemic Heart disease Risk Factor Study                 | Finland       | 1984-1991. Mean follow up 4.9 years. | 42-60     | Male   | 1453        | Recreation           | HR          | <0.7 hr/week: 1.00; 0.7-2.2 hr/week: 1.11 (0.58, 2.12); >2.2 hr/week: 0.31 (0.12, 0.85)                                  | Age, Year Of Examination                                                                                                                                           | 5         |
| Leon (1997)   | Participants of the Multiple Risk Factor Intervention Trial (MRFIT) | United States | 1974-1990. Mean follow up 7 years.   | 35-57     | Male   | 12138       | Recreation           | RR          | 0-9 Min/Day: 1.00; 10-36 Min/Day: 0.75 (0.54, 0.96); 37-75 Min/Day: 0.81 (0.64, 1.04); 76-359 Min/Day: 0.75 (0.59, 0.96) | Age, Intervention Group, Education, Cigarettes Per Day, Serum Cholesterol, Diastolic BP, BMI                                                                       | 6         |
| Li (2006)     | Nurses' Health Study                                                | United States | 1980-2000                            | 34-59     | Female | 88393       | Recreation           | RR          | < 1 hr/week: 1.43 (1.26, 1.63);                                                                                          | Age, Smoking Status,                                                                                                                                               | 7         |

| Author (Year)    | Study Name                       | Country | Time Period | Age Range | Sex            | Sample Size                        | Activity Type | Effect Type | Effect                                                                                                                                                                                                                                                                                                                                                                                                                                                          | Covariates adjusted                                                                                                                    | NOS score |
|------------------|----------------------------------|---------|-------------|-----------|----------------|------------------------------------|---------------|-------------|-----------------------------------------------------------------------------------------------------------------------------------------------------------------------------------------------------------------------------------------------------------------------------------------------------------------------------------------------------------------------------------------------------------------------------------------------------------------|----------------------------------------------------------------------------------------------------------------------------------------|-----------|
|                  |                                  |         |             |           |                |                                    |               |             | 1 - 3.49 hr/week: 1.34 (1.18, 1.51);<br>≥3.5 hr/week: 1.00                                                                                                                                                                                                                                                                                                                                                                                                      | Parental History of Coronary Heart Disease, Postmenopausal Status, Hormone Use, Alcohol Consumption, Aspirin Use, BMI                  |           |
| Mannsværk (2015) | The Tromsø Study                 | Norway  | 1994-2010.  | 25-100    | Both           | 29582                              | Recreation    | HR          | <1 Hour Per Week: 1.0;<br>>=1 Hour Per Week: 0.84 (0.74, 0.94)                                                                                                                                                                                                                                                                                                                                                                                                  | Gender and Age                                                                                                                         | 6         |
| Meisinger (2007) | The MONICA Augsburg cohort study | Germany | 1984-2002   | 45-74     | Male<br>Female | 3501 (males)<br><br>3475 (females) | Recreation    | HR          | Males:<br>No Sports Activities in Leisure Time: 1.00; Low Level of Sports Activities in Leisure Time: 1.01 (0.73, 1.40); Moderate Level of Sports Activities in Leisure Time: 0.78 (0.56, 1.10); High Level of Sports Activities in Leisure Time: 0.84 (0.59, 1.18)<br><br>Females:<br>No Sports Activities in Leisure Time: 1.00; Low Level of Sports Activities in Leisure Time: 1.00 (0.56, 1.78); Moderate Level of Sports Activities in Leisure Time: 0.49 | Age, Baseline Survey, Actual Hypertension, Dyslipidemia, History of Diabetes, Smoking, Alcohol, Parental History of MI, Education, BMI | 9         |

| Author (Year)  | Study Name                                                                                                                  | Country        | Time Period                                     | Age Range | Sex  | Sample Size | Activity Type                  | Effect Type | Effect                                                                                                                                                                                                                                                                                                                                                                                   | Covariates adjusted     | NOS score |
|----------------|-----------------------------------------------------------------------------------------------------------------------------|----------------|-------------------------------------------------|-----------|------|-------------|--------------------------------|-------------|------------------------------------------------------------------------------------------------------------------------------------------------------------------------------------------------------------------------------------------------------------------------------------------------------------------------------------------------------------------------------------------|-------------------------|-----------|
|                |                                                                                                                             |                |                                                 |           |      |             |                                |             | (0.24, 1.00)<br>High Level of Sports Activities in Leisure Time: 0.21 (0.05, 0.87)                                                                                                                                                                                                                                                                                                       |                         |           |
| Menotti (2015) | the Italian Rural Areas of the Seven Countries Study of Cardiovascular Diseases                                             | Italy          | 1960-2010.                                      | 40-59     | Male | 1585        | occupation                     | HR          | Sedentary (Mean Estimated Energy Expenditure=2500 Kcal): 1.00;<br>Moderate (Mean Estimated Energy Expenditure=2700 Kcal): 0.68 (0.49, 0.94);<br>Vigorous (Mean Estimated Energy Expenditure=3100 Kcal): 0.67 (0.50, 0.89)                                                                                                                                                                | Cigarette Smoking, Diet | 6         |
| Morris (1990)  | Male executive officers aged 45-64 in the Department of Health and Social Security and in Inland Revenue throughout Britain | United Kingdom | 1976-1986. Mean follow up 9 years and 4 months. | 45-64     | Male | 9376        | Recreation+Commuting+Housework | RR          | Risk of IHD incidence:<br>No Vigorous Aerobic Exercise : 1.00;<br>Residual Vigorous Aerobic Exercise: 0.85 (0.68, 1.08);<br>Next Lesser Degree of This: 0.76 (0.56, 1.01);<br>Frequent Vigorous Aerobic Exercise: 0.35 (0.21, 0.57)<br><br>Risk of IHD mortality:<br>No Vigorous Aerobic Exercise: 1.00;<br>Residual Vigorous Aerobic Exercise: 0.88 (0.66, 1.17);<br>Next Lesser Degree |                         | 5         |

| Author (Year)       | Study Name                                                                                    | Country       | Time Period                        | Age Range | Sex            | Sample Size                    | Activity Type        | Effect Type | Effect                                                                                                                                                                                     | Covariates adjusted                                                                               | NOS score |
|---------------------|-----------------------------------------------------------------------------------------------|---------------|------------------------------------|-----------|----------------|--------------------------------|----------------------|-------------|--------------------------------------------------------------------------------------------------------------------------------------------------------------------------------------------|---------------------------------------------------------------------------------------------------|-----------|
|                     |                                                                                               |               |                                    |           |                |                                |                      |             | of This: 0.78 (0.54, 1.12);<br>Frequent Vigorous Aerobic Exercise: 0.34 (0.18, 0.66)                                                                                                       |                                                                                                   |           |
| Paffenbarger (1978) | Harvard Alumni                                                                                | United States | 1962-1972                          | 35-74     | Male           | 16936                          | Recreation+Commuting | RR          | <2000 kcal/week: 1.64<br>≥2000 kcal/week: 1.0                                                                                                                                              | Age                                                                                               | 5         |
| Pedersen (2008)     | The Copenhagen City Heart Study                                                               | Denmark       | 1981-2001                          | 20+       | Male<br>Female | 5272 (males)<br>6624 (females) | Recreation           | HR          | Males:<br>Inactive: 1.00;<br>Low: 0.68 (0.55, 0.83);<br>Moderate/High: 0.71 (0.58, 0.83)<br><br>Females:<br>Inactive: 1.00;<br>Low: 0.75 (0.60, 0.92);<br>Moderate/High: 0.72 (0.57, 0.92) | Age, Smoking, BMI, Education, Marital Status, Diabetes, Alcohol Intake, HDL-cholesterol           | 7         |
| Qvist (1996)        | Data from Nation-wide Swedish Level of living Survey and the national Cause of Death Register | Sweden        | 1980-1990                          | 45-74     | Male<br>Female | 2546 (males)<br>2760 (females) | Recreation           | RR          | Males:<br>Inactivity: 1.26 (0.90, 1.80);<br>Activity: 1.00<br><br>Females:<br>Inactivity: 1.35 (0.80, 2.20);<br>Activity: 1.00                                                             | Age, Blood Pressure, Weight Index, Smoking                                                        | 7         |
| Rosengren (1997)    | The Multifactor Primary Prevention Study                                                      | Sweden        | 1970-1993. Mean follow up 20 years | 47-55     | Male           | 7142                           | Recreation           | RR          | Sedentary: 1.00;<br>Moderately Active: 0.84 (0.71, 1.00);<br>Regular Exercise (Includes Men Who Did Athletic Sports): 0.84 (0.73, 0.96)                                                    | Age, Diastolic BP, Serum Cholesterol, Smoking, Alcohol Abuse, BMI, Diabetes, Manual vs Non-Manual | 8         |

| Author (Year)   | Study Name                                           | Country       | Time Period                        | Age Range | Sex                | Sample Size                        | Activity Type                                                | Effect Type | Effect                                                                                                                                                                                                                   | Covariates adjusted                                                                           | NOS score |
|-----------------|------------------------------------------------------|---------------|------------------------------------|-----------|--------------------|------------------------------------|--------------------------------------------------------------|-------------|--------------------------------------------------------------------------------------------------------------------------------------------------------------------------------------------------------------------------|-----------------------------------------------------------------------------------------------|-----------|
|                 |                                                      |               |                                    |           |                    |                                    |                                                              |             |                                                                                                                                                                                                                          | Occupational Class                                                                            |           |
| Salonen (1982)  | Random sample from the population of Eastern Finland | Finland       | 1972-1978. Mean follow-up 3 years. | 30-59     | Male<br><br>Female | 3978 (males)<br><br>3688 (females) | Recreation+Commuting<br><br><br><br><br><br><br>Occupational | RR          | Males:<br>Low: 1.20 (0.90, 1.50);<br>High: 1.00<br><br>Females:<br>Low: 1.50 (0.90, 2.50);<br>High: 1.00<br><br>Males:<br>Low: 1.50 (1.20, 2.00);<br>High: 1.00<br><br>Females:<br>Low: 2.40 (1.50, 3.70);<br>High: 1.00 | Age, Serum Cholesterol, Diastolic BP, BMI, Daily Number of Tobacco Products                   | 7         |
| Sesso (2000)    | Harvard Alumni Health Study                          | United States | 1977-1993                          | 39-88     | Male               | 12516                              | Recreation+Commuting                                         | RR          | <2100 kJ/week: 1.00;<br>2100-4199 kJ/week: 0.90 (0.79, 1.03);<br>4200-8399 kJ/week: 0.81 (0.71, 0.92);<br>8400-12599 kJ/week: 0.80 (0.69, 0.93);<br>≥12600 kJ/week: 0.81 (0.71, 0.94)                                    | Age, BMI, Alcohol, Hypertension, Diabetes Mellitus, Smoking, Early Parental Death (<65 Years) | 5         |
| Slattery (1989) | The US Railroad study                                | United States | 1957-1977                          | 40-60     | Male               | 2548                               | Recreation                                                   | HR          | ≤250 kcal/week: 1.28 (0.99, 1.63);<br>251-1000 kcal/week: 1.11 (1.00, 1.23);<br>1001-1999 kcal/week: 1.05 (1.00, 1.11);<br>≥2000 kcal/week: 1.00                                                                         | Age, Systolic Blood Pressure, Serum Cholesterol, Smoking                                      | 7         |
| Sobolski (1987) | Employed men (40-55)                                 | Belgium       | 1976-1983                          | 40-55     | Male               | 2109                               | Recreation                                                   | RR          | Quartile 1 (Low): 0.69 (0.20, 2.20);                                                                                                                                                                                     |                                                                                               | 5         |

| Author (Year)     | Study Name                                                                                                        | Country   | Time Period                           | Age Range | Sex    | Sample Size | Activity Type | Effect Type | Effect                                                                                                                                                                                                                             | Covariates adjusted                                                                                                                            | NOS score |
|-------------------|-------------------------------------------------------------------------------------------------------------------|-----------|---------------------------------------|-----------|--------|-------------|---------------|-------------|------------------------------------------------------------------------------------------------------------------------------------------------------------------------------------------------------------------------------------|------------------------------------------------------------------------------------------------------------------------------------------------|-----------|
|                   | yrs) in selected factories                                                                                        |           |                                       |           |        |             | Occupational  |             | Quartile 2: 1.00 (0.36, 2.90);<br>Quartile 3: 0.79 (0.25, 2.40);<br>Quartile 4 (High): 1.00<br><br>Quartile 1 (Low): .82 (0.28, 2.30); Quartile 2: 0.50 (0.14, 1.60);<br>Quartile 3: 0.81 (0.28, 2.30);<br>Quartile 4 (High): 1.00 |                                                                                                                                                |           |
| Sundquist (2005)  | The Swedish Annual Level-of-Living Survey data linked to the Swedish National Hospital Discharge Register (SALLS) | Sweden    | 1988-2000. Mean follow up 11.7 years. | 35-74     | Both   | 5191        | Recreation    | HR          | None: 1.0<br>Occasionally: 0.76 (0.55, 1.07);<br>1-2 times/week: 0.74 (0.53, 1.04);<br>Vigorously at Least Twice per Week: 0.59 (0.37, 0.95)                                                                                       | Age, Sex, Income, Smoking, BMI                                                                                                                 | 7         |
| Tamosiunas (2014) | Five general population surveys in Kaunas, Lithuania                                                              | Lithuania | 1983-2011 Mean follow up 13.3 years.  | 45-64     | Male   | 2310        | Recreation    | HR          | Inactive (<2.0 Hours/Week): 1.38 (0.89, 2.13);<br>Intermediate (2-6.99 Hours/Week): 1.05 (0.78, 1.42); Active (≥7 Hours/Week): 0.69 (0.52, 0.92)                                                                                   | Age, Education, Alcohol Intake Frequency, Study Survey Year, Smoking Status, Body Mass Index, Total Cholesterol Level, Blood Pressure, Fasting | 7         |
|                   |                                                                                                                   |           |                                       |           | Female | 2579        | Recreation    |             | Inactive (<2.0 Hours/Week): 1.47 (0.71, 3.05);<br>Intermediate (2-6.99 Hours/Week): 0.83                                                                                                                                           |                                                                                                                                                |           |



| Author (Year)      | Study Name                                                     | Country                | Time Period                              | Age Range | Sex  | Sample Size | Activity Type        | Effect Type | Effect                                                                                                                                                                                        | Covariates adjusted                                                                                              | NOS score |
|--------------------|----------------------------------------------------------------|------------------------|------------------------------------------|-----------|------|-------------|----------------------|-------------|-----------------------------------------------------------------------------------------------------------------------------------------------------------------------------------------------|------------------------------------------------------------------------------------------------------------------|-----------|
|                    |                                                                |                        |                                          |           |      |             |                      |             | (0.50, 1.39); Active ( $\geq 7$ Hours/Week): 0.82 (0.52, 1.28)                                                                                                                                | Glucose Level, Antihypertensive Treatment, Hypoglycemic Therapy, Lipid Lowering Treatment                        |           |
| Tanasescu (2002)   | The Health Professionals' Follow-up Study (HPFS)               | United States          | 1986-1998<br>Mean follow-up 6 years.     | 40-75     | Male | 44452       | Recreation           | RR          | 0-6.32 MET-h/wk: 1.00;<br>6.33-14.49 MET-h/wk: 0.93 (0.80, 1.06);<br>14.5-25.08 MET-h/wk: 0.90 (0.78, 1.05);<br>25.09-41.98 MET-h/wk: 0.87 (0.71, 1.01);<br>41.99 MET-h/wk: 0.74 (0.63, 0.87) | Alcohol, Smoking, Family History of MI, Nutrient Intake, Diabetes, High Cholesterol, Hypertension, BMI           | 7         |
| Wagner (2002)      | The Prospective Epidemiological Study of Myocardial Infarction | United Kingdom, France | 1991-1996                                | 50-59     | Male | 9758        | Recreation           | RR          | Lowest: 1.00;<br>Middle: 0.73 (0.51, 1.05);<br>Highest: 0.66 (0.46, 0.96)                                                                                                                     |                                                                                                                  | 6         |
| Wannamethee (2000) | The British Regional Heart Study                               | United Kingdom         | 1978-1995.<br>Mean follow up 16.8 years. | 40-59     | Male | 5159        | Recreation+Commuting | RR          | Inactive: 1.00;<br>Occasional: 0.71 (0.54, 0.93);<br>Light: 0.79 (0.61, 1.05);<br>Moderate: 0.49 (0.55, 0.68);<br>Moderately Vigorous/Vigorous: 0.89 (0.66, 1.18)                             | Age, Smoking, Alcohol, Social Class, BMI, Preexisting CHD, Insulin, Diastolic BP, Triglyceride, HDL Cholesterol, | 7         |

| Author (Year)    | Study Name                      | Country       | Time Period                           | Age Range | Sex    | Sample Size | Activity Type        | Effect Type | Effect                                                                                                                                          | Covariates adjusted                                                                                               | NOS score |
|------------------|---------------------------------|---------------|---------------------------------------|-----------|--------|-------------|----------------------|-------------|-------------------------------------------------------------------------------------------------------------------------------------------------|-------------------------------------------------------------------------------------------------------------------|-----------|
|                  |                                 |               |                                       |           |        |             |                      |             |                                                                                                                                                 | Urate, Heart Rate                                                                                                 |           |
| Weinstein (2008) | The Women's Health Study        | United States | 1992-2004. Mean follow up 10.9 years. | 45+       | Female | 38987       | Recreation+Commuting | RR          | 0-199 kcal/week: 1.00;<br>200-599 kcal/week: 0.88 (0.73, 1.06);<br>600-1499 kcal/week: 0.78 (0.64, 0.94);<br>≥1500 kcal/week: 0.78 (0.63, 0.97) | Age, Treatment Randomization, Parental History MI, Alcohol, Smoking, Hormone Replacement Therapy, Dietary Factors | 7         |
| Weller (1998)    | the Canada Fitness Survey (CFS) | Canada        | 1981-1988                             | 30+       | Female | 6620        | Total daily activity | OR          | ≥0 kcal/kg/day: 1.00;<br>≥3.9 kcal/kg/day: 0.95 (0.60, 1.51);<br>≥7.0 kcal/kg/day: 0.45 (0.25, 0.83);<br>≥11.3 kcal/kg/day: 0.61 (0.32, 1.15)   | Age                                                                                                               | 6         |

**Table E.** Characteristics and quality assessment of studies included in the meta-regression analysis for the association between physical activity and ischemic stroke

| Author (Year)     | Study Name              | Country        | Time Period                            | Age Range | Sex    | Sample Size | Activity Type        | Effect Type | Effect                                                                                                                                                                                     | Covariates adjusted                                                                                                                                                                                                                                  | NOS score |
|-------------------|-------------------------|----------------|----------------------------------------|-----------|--------|-------------|----------------------|-------------|--------------------------------------------------------------------------------------------------------------------------------------------------------------------------------------------|------------------------------------------------------------------------------------------------------------------------------------------------------------------------------------------------------------------------------------------------------|-----------|
| Abbott (1994)     | Honolulu Heart Program  | United States  | 1965-1990                              | 55-68     | Male   | 1854        | Total daily activity | RR          | Inactive: 1.8 (1.1, 3.1);<br>Partially Active: 1.7 (1.0, 2.8);<br>Active: 1.0                                                                                                              | Systolic BP, Serum Cholesterol, Alcohol, Serum Glucose, Serum Uric Acid, Hematocrit                                                                                                                                                                  | 7         |
| Agnarsson (1999)  | The Reykjavik Study     | Iceland        | 1979-1993. Mean follow up 10.6 years   | 45-80     | Male   | 4484        | Recreation           | RR          | Physical Activity after age 40:<br>No: 1.00;<br>Yes: 0.62 (0.40, 0.97)                                                                                                                     | Age, BMI, Smoking, Hypertension, FEV                                                                                                                                                                                                                 | 7         |
| Armstrong (2015)  | The Million Women Study | United Kingdom | 1998-Mean follow up 9 years            | 50-64     | Female | 1014862     | Recreation           | RR          | Rarely/never: 1 (0.95, 1.06);<br>At most once per week: 0.89 (0.84, 0.94);<br>2-3 times per week: 0.82 (0.77, 0.87);<br>4-6 times per week: 0.83 (0.76, 0.92);<br>Daily: 0.91 (0.86, 0.97) | Adjusted For BMI-by-Age, Smoking-by-Age, Alcohol-by-Age, Stratified By SES and Region                                                                                                                                                                | 7         |
| Autenrieth (2013) | The ARIC Study          | United States  | 1987-2007. Median follow up 18.8 years | 45-64     | Both   | 13069       | Recreation           | HR          | Poor Physical Activity: 1.00;<br>Intermediate Physical Activity: 0.93 (0.76, 1.14);<br>Ideal Physical Activity: 0.84 (0.65, 1.07)                                                          | Age, Sex, Race-Field Center, Cigarette-Years, Educational Level, Waist-To-Hip Ratio, Systolic Blood Pressure, Antihypertensive Medication Use, Diabetes, Left Ventricular Hypertrophy, High-Density Lipoprotein Cholesterol, Low-Density Lipoprotein | 8         |

| Author (Year)  | Study Name                                                    | Country       | Time Period                          | Age Range                       | Sex            | Sample Size                      | Activity Type         | Effect Type | Effect                                                                                                                                                                                                                                                         | Covariates adjusted                                                                                                                      | NOS score |
|----------------|---------------------------------------------------------------|---------------|--------------------------------------|---------------------------------|----------------|----------------------------------|-----------------------|-------------|----------------------------------------------------------------------------------------------------------------------------------------------------------------------------------------------------------------------------------------------------------------|------------------------------------------------------------------------------------------------------------------------------------------|-----------|
|                |                                                               |               |                                      |                                 |                |                                  |                       |             |                                                                                                                                                                                                                                                                | Cholesterol, Lipoprotein(A), Fibrinogen, Von Willebrand Factor, White Blood Cell Count                                                   |           |
| Bijnen (1998)  | The Zutphen Study                                             | Netherlands   | 1985-1995                            | 64-84                           | Male           | 802                              | Recreation+ Commuting | RR          | Lowest Tertile: 1.00; Middle Tertile: 0.65 (0.33, 1.25); Highest Tertile: 0.55 (0.24, 1.26)                                                                                                                                                                    | Age, Baseline Stroke, Smoking, Alcohol                                                                                                   | 5         |
| Calling (2006) | The Malmo Diet and Cancer Study                               | Sweden        | 1991-2003. Mean follow up 7.6 years. | 45-73                           | Both           | 26942                            | Recreation            | RR          | Low Active: 1.00; Active: 0.60 (0.50, 0.71)                                                                                                                                                                                                                    | Age, Sex                                                                                                                                 | 5         |
| Chiuve (2008)  | Health Professionals Follow-up Study and Nurses' Health Study | United States | 1984-2004                            | 38-53 (female)<br>40-75 (males) | Female<br>Male | 71243 (females)<br>43685 (males) | Recreation            | RR          | Females:<br>0 hr/week: 1.66 (1.26, 2.20);<br>0.01-1.0 hr/week: 1.29 (0.97, 1.71);<br>1.0-3.5 hr/week: 1.19 (0.89, 1.58);<br>3.5-6.0 hr/week: 0.91 (0.65, 1.28);<br>6.0+ hr/week: 1.00<br><br>Males:<br>0 hr/week: 1.76 (1.34, 2.30);<br>0.01-1.0 hr/week: 1.41 | Age, Calendar Year, Parental History of MI before 60, Regular Aspirin Use and Vitamin E Supplementation, Use of Hormone Therapy in Women | 6         |

| Author (Year)    | Study Name                                                                                                                                    | Country | Time Period                        | Age Range | Sex    | Sample Size | Activity Type                 | Effect Type | Effect                                                                                                                                                                                    | Covariates adjusted                                                                                                                                                                                          | NOS score |
|------------------|-----------------------------------------------------------------------------------------------------------------------------------------------|---------|------------------------------------|-----------|--------|-------------|-------------------------------|-------------|-------------------------------------------------------------------------------------------------------------------------------------------------------------------------------------------|--------------------------------------------------------------------------------------------------------------------------------------------------------------------------------------------------------------|-----------|
|                  |                                                                                                                                               |         |                                    |           |        |             |                               |             | (1.00, 2.00);<br>1.0-3.5<br>hr/week: 1.34<br>(1.00, 1.81);<br>3.5-6.0<br>hr/week: 1.44<br>(1.03, 2.03);<br>6.0+ hr/week:<br>1.00                                                          |                                                                                                                                                                                                              |           |
| Ellekjaer (2000) | A general health survey in Nord-Trondelag county in Norway                                                                                    | Norway  | 1984-1994                          | 50-101    | Female | 13669       | Recreation                    | RR          | Low: 1.00;<br>Medium: 0.75 (0.58, 0.97);<br>High: 0.54 (0.39, 0.75)                                                                                                                       | (Participants Who Survived First 2 Years Of Follow-Up)<br>Age, Smoking, Diabetes, BMI, Antihypertensive Medication, Systolic BP, Angina Pectoris, MI, Illness that Impairs Function in Daily Life, Education | 7         |
| Gulsvik (2012)   | The Bergen Clinical Blood Pressure Survey                                                                                                     | Norway  | 1965-2007.                         | 22-75     | Both   | 5653        | recreation and transportation | HR          | No/Low: 1.00;<br>Moderate: 0.83 (0.67, 1.03);<br>High: 0.66 (0.47, 0.93)                                                                                                                  | Age, Sex                                                                                                                                                                                                     | 6         |
| Haheim (1993)    | Men participated in a screening study in Oslo who later participated in the dietary and smoking intervention trial and the hypertension trial | Norway  | 1972-1984. Mean follow-up 6 years. | 40-49     | Male   | 14403       | Recreation                    | RR          | Risk of Stroke Incidence:<br>Sedentary: 1.00;<br>Moderate: 0.64 (0.38, 1.08);<br>Intermediate+Great: 0.36 (0.15, 0.80)<br>Risk of Stroke Mortality:<br>Sedentary: 1.00;<br>Moderate: 0.82 |                                                                                                                                                                                                              | 5         |

| Author (Year)  | Study Name                                                          | Country       | Time Period                           | Age Range | Sex    | Sample Size | Activity Type            | Effect Type | Effect                                                                                                                                                                                                                          | Covariates adjusted                                                                                                                                                                                  | NOS score |
|----------------|---------------------------------------------------------------------|---------------|---------------------------------------|-----------|--------|-------------|--------------------------|-------------|---------------------------------------------------------------------------------------------------------------------------------------------------------------------------------------------------------------------------------|------------------------------------------------------------------------------------------------------------------------------------------------------------------------------------------------------|-----------|
|                |                                                                     |               |                                       |           |        |             |                          |             | (0.33, 2.35);<br>Intermediate+G<br>reat: 0.29<br>(0.03, 1.51)                                                                                                                                                                   |                                                                                                                                                                                                      |           |
| Hu (2000)      | Nurses' Health Study                                                | United States | 1986-1994                             | 40-65     | Female | 72488       | Total Physical Activity  | RR          | 0-2.0 MET<br>hr/week: 1.00;<br>2.1-4.6 MET<br>hr/week: 0.87<br>(0.62, 1.23);<br>4.7-10.4 MET<br>hr/week: 0.83<br>(0.58, 1.19);<br>10.5-21.7 MET<br>hr/week: 0.76<br>(0.52, 1.11);<br>>21.7 MET<br>hr/week: 0.52<br>(0.33, 0.80) | Age, Time, Cigarette Smoking, BMI, Menopausal Status, Hormone Replacement Therapy, Parental History MI Before Age 60, Alcohol Consumption, Aspirin Use, Hypertension, Diabetes, Hypercholesterolemia | 7         |
| Hu (2005)      | Six independent population surveys in 5 geographic areas of Finland | Finland       | 1972-2003. Mean follow up 15.5 years. | 25-64     | Both   | 47721       | Recreation               | HR          | Low: 1.00;<br>Moderate: 0.85<br>(0.79, 0.92);<br>High: 0.73<br>(0.64, 0.84)                                                                                                                                                     | Age, Area, Study Year, BMI, SBP, Cholesterol, Education, Smoking, Alcohol Consumption, Diabetes                                                                                                      | 7         |
| Lapidus (1986) | A population study of women in Gothenburg, Sweden                   | Sweden        | 1968-1981. Mean follow-up 6.5 years.  | 38-60     | Female | 1462        | Recreation               | RR          | Group I (Low):<br>10.1 (3.80,<br>27.1); Groups<br>II, III, IV<br>(More Active):<br>1.00                                                                                                                                         | Age                                                                                                                                                                                                  | 6         |
| Lee (1998)     | Harvard University alumni                                           | United States | 1977-1990                             | 43-88     | Male   | 11130       | Recreation+C<br>ommuting | RR          | <1000<br>kcal/week:<br>1.00;<br>1000-1999<br>kcal/week: 0.76<br>(0.59, 0.98);                                                                                                                                                   | Age, Smoking, Alcohol, Early Parental Death                                                                                                                                                          | 4         |

| Author (Year)      | Study Name                                                                       | Country        | Time Period                           | Age Range | Sex    | Sample Size | Activity Type           | Effect Type | Effect                                                                                                                                                              | Covariates adjusted                                                                                                                                                                        | NOS score |
|--------------------|----------------------------------------------------------------------------------|----------------|---------------------------------------|-----------|--------|-------------|-------------------------|-------------|---------------------------------------------------------------------------------------------------------------------------------------------------------------------|--------------------------------------------------------------------------------------------------------------------------------------------------------------------------------------------|-----------|
|                    |                                                                                  |                |                                       |           |        |             |                         |             | 2000-2999 kcal/week: 0.54 (0.38, 0.76);<br>3000-3999 kcal/week: 0.78 (0.53, 1.15);<br>≥4000 kcal/week: 0.82 (0.58, 1.14)                                            |                                                                                                                                                                                            |           |
| Lee (1999)         | Physicians' Health Study                                                         | United States  | 1982-1995. Mean follow up 11.1 years. | 40-84     | Male   | 21823       | Recreation              | RR          | Frequency of Vigorous Exercise:<br><1 Time/Week: 1.00;<br>1 Time/Week: 0.90 (0.66, 1.22);<br>2-4 Times/Week: 0.95 (0.74, 1.22);<br>≥5 Times/Week: 0.97 (0.71, 1.32) | Age, Treatment Assigned, Smoking, Alcohol, History Of Angina, Parental History of MI at <60 Years, BMI, History of Hypertension, History of High Cholesterol, History of Diabetes Mellitus | 7         |
| Lindenstrom (1993) | The Copenhagen City Health Study (CCHS)                                          | Denmark        | 1976-1988                             | 35+       | Female | 7060        | Recreation              | RR          | Inactive: 1.45 (1.01, 2.08);<br>Active: 1.00                                                                                                                        | Age, Education, Household Income, Smoking, Daily Number Cigarettes, Alcohol, Daily Consumption of Tranquilizers, BMI                                                                       | 7         |
| Myint (2006)       | European Prospective Investigation into Cancer-Norfolk (EPIC-Norfolk) population | United Kingdom | 1993-2004. Mean follow up 8.6 years.  | 40-79     | Both   | 22602       | Recreation+Occupational | RR          | Inactive: 1.00;<br>Moderately Inactive: 0.78 (0.61, 1.00);<br>Moderately Active: 0.66 (0.49, 0.91);<br>Active: 0.70                                                 | Age, Sex, Systolic Blood Pressure, BMI, Cholesterol, History of Diabetes and Cigarette Smoking Status                                                                                      | 7         |

| Author (Year)        | Study Name                                                    | Country       | Time Period                        | Age Range                        | Sex            | Sample Size                    | Activity Type | Effect Type | Effect                                                                                                                                                                                   | Covariates adjusted                                                         | NOS score |
|----------------------|---------------------------------------------------------------|---------------|------------------------------------|----------------------------------|----------------|--------------------------------|---------------|-------------|------------------------------------------------------------------------------------------------------------------------------------------------------------------------------------------|-----------------------------------------------------------------------------|-----------|
|                      | study                                                         |               |                                    |                                  |                |                                |               |             | (0.49, 0.99)                                                                                                                                                                             |                                                                             |           |
| Okada (1976)         | Men and women from Akabane and Asahi in Japan                 | Japan         | 1964-1970                          | 40-79                            | Both           | 4186                           | Occupational  | RR          | None: 1.20 (0.13, 4.69);<br>Casual: 2.30 (0.41, 6.95);<br>Restrained: 2.30 (0.13, 4.69);<br>Regular: 1.00                                                                                | Age, Sex                                                                    | 5         |
| Paffenbar ger (1978) | San Francisco longshoremen                                    | United States | 1951-1972                          | 35-74                            | Male           | 3686                           | Occupational  | RR          | 4750-8250 Kcal/Week: 1.50 (0.56, 4.49);<br>8500-10750 Kcal/Week: 1.00                                                                                                                    | Age, Smoking, Systolic BP                                                   | 5         |
| Paganini-Hill (2001) | Residents of Leisure World Laguna Hills                       | United States | 1981-1998                          | 44-101                           | Male<br>Female | 4722 (males)<br>8532 (females) | Recreation    | RR          | Males:<br><0.5 hr/day: 1.00;<br>1+ hr/day: 0.85 (0.72, 1.01)<br><br>Females:<br><0.5 hr/day: 1.00;<br>1+ hr/day: 0.83 (0.73, 0.95)                                                       | Age                                                                         | 5         |
| Salonen (1982)       | Random population sample from two counties of Eastern Finland | Finland       | 1972-1978. Mean follow-up 3 years. | 30-59 (males)<br>35-59 (females) | Male<br>Female | 3978 (males)<br>3688 (females) | Recreation    | RR          | Males:<br>Low Activity in Leisure: 1.00 (0.70, 1.50);<br>High Activity in Leisure: 1.00<br><br>Females:<br>Low Activity in Leisure: 1.30 (0.80, 2.00);<br>High Activity in Leisure: 1.00 | Age, Serum Cholesterol, Diastolic BP, BMI, Daily Number of Tobacco Products | 7         |



| Author (Year)     | Study Name                                                               | Country       | Time Period                           | Age Range | Sex    | Sample Size                                                   | Activity Type        | Effect Type | Effect                                                                                                                                                                                                                                                                                | Covariates adjusted                                                                                                                                                                                                                                                                                                | NOS score |
|-------------------|--------------------------------------------------------------------------|---------------|---------------------------------------|-----------|--------|---------------------------------------------------------------|----------------------|-------------|---------------------------------------------------------------------------------------------------------------------------------------------------------------------------------------------------------------------------------------------------------------------------------------|--------------------------------------------------------------------------------------------------------------------------------------------------------------------------------------------------------------------------------------------------------------------------------------------------------------------|-----------|
| Sattelmair (2010) | Women's Health Study                                                     | United States | 1992-2004. Mean follow up 10.4 years. | 45+       | Female | 39315                                                         | Recreation           | RR          | 0 – 199 kcal/week: 1.00;<br>200 – 599 kcal/week: 1.11 (0.85, 1.46);<br>600 – 1499 kcal/week: 0.87 (0.66, 1.16);<br>1500 + kcal/week: 0.88 (0.65, 1.19)                                                                                                                                | Age, Randomized Treatment Assignment, Smoking; Alcohol; Saturated fat, Fruit and Vegetable, and Fiber intake; Postmenopausal hormone therapy; Menopausal status, Parental history of myocardial infarction, Migraine Aura, BMI, History of Diabetes, History of Elevated Cholesterol, and History of Hypertension. | 7         |
| Simonsick (1993)  | Established Populations for Epidemiologic Studies of the Elderly (EPESE) | United States | 1982-1989                             | 65+       | Both   | 2712 (East boston)<br><br>2190 (New Haven)<br><br>2539 (Iowa) | Recreation+Housework | OR          | East Boston:<br>Inactive: 1.00;<br>Moderate: 1.73 (0.98, 3.06);<br>High: 1.21 (0.56, 2.61)<br><br>New Haven:<br>Inactive: 1.00;<br>Moderate: 1.29 (0.72, 2.32);<br>High: 1.05 (0.52, 2.12)<br><br>Iowa:<br>Inactive: 1.00;<br>Moderate: 0.97 (0.64, 1.48);<br>High: 0.56 (0.31, 1.03) | Age, Sex, Education, Work Status, Smoking, Depressive Symptomatology, Self-Rated Health, Respiratory Symptoms, History of MI and Stroke, Diabetes at Baseline, Angina at Baseline                                                                                                                                  | 5         |

| Author (Year)       | Study Name                       | Country        | Time Period | Age Range | Sex  | Sample Size | Activity Type        | Effect Type | Effect                                                                                                                                                                               | Covariates adjusted                                                                                        | NOS score |
|---------------------|----------------------------------|----------------|-------------|-----------|------|-------------|----------------------|-------------|--------------------------------------------------------------------------------------------------------------------------------------------------------------------------------------|------------------------------------------------------------------------------------------------------------|-----------|
| Wannan et al (1992) | The British regional heart study | United Kingdom | 1978-1988   | 40-59     | Male | 7735        | Recreation+Commuting | RR          | Inactive: 1.00<br>Occasional: 0.80 (0.34, 1.81);<br>Light: 0.60 (0.23, 1.45)<br>Moderate: 0.70 (0.19, 1.46)<br>Moderately Vigorous: 0.70 (0.12, 1.16)<br>Vigorous: 0.20 (0.00, 0.82) | Age, Social Class, Smoking, Heavy Drinking, BMI, Systolic BP                                               | 7         |
| Willey (2009)       | The Northern Manhattan Study     | United States  | 1993-2002   | 40-107    | Both | 3298        | Recreation           | HR          | No Physical Activity: 1.00;<br>Light: 0.94 (0.71, 1.25);<br>Moderate To Heavy: 0.65 (0.43, 0.98)                                                                                     | Hypertension, Diabetes, Moderate Alcohol Intake and Tobacco Use                                            | 8         |
| Zhang (2013)        | The Kailuan study                | China          | 2006-2010   | 18-98     | Both | 91698       | Recreation           | HR          | Non-ideal: 1.00;<br>Ideal: 0.76 (0.64, 0.90)                                                                                                                                         | Age, Sex, Hospital, Education, Income, Diet, Total Cholesterol, Blood Pressure, Fasting Blood Glucose, BMI | 6         |

## References

- Abbott RD, Rodriguez BL, Burchfiel CM, Curb JD. Physical activity in older middle-aged men and reduced risk of stroke: the Honolulu Heart Program. *Am J Epidemiol.* 1994; 139(9): 881-93.
- Agnarsson U, Thorgeirsson G, Sigvaldason H, Sigfusson N. Effects of leisure-time physical activity and ventilatory function on risk for stroke in men: the Reykjavik Study. *Ann Intern Med.* 1999; 130(12): 987-90.
- Akesson A, Weismayer C, Newby PK, Wolk A. Combined effect of low-risk dietary and lifestyle behaviors in primary prevention of myocardial infarction in women. *Arch Intern Med.* 2007; 167(19): 2122-7.
- Allesøe K, Holtermann A, Aadahl M, Thomsen JF, Hundrup YA, Sjøgaard K. High occupational physical activity and risk of ischaemic heart disease in women: The interplay with physical activity during leisure time. *European journal of preventive cardiology.* 2015 ;22(12):1601-8.
- Armstrong ME, Green J, Reeves GK, Beral V, Cairns BJ. Frequent physical activity may not reduce vascular disease risk as much as moderate activity: large prospective study of UK women. *Circulation.* 2015 Feb 16:CIRCULATIONAHA-114.
- Autenrieth CS, Evenson KR, Yatsuya H, Shahar E, Baggett C, Rosamond WD. Association between physical activity and risk of stroke subtypes: the atherosclerosis risk in communities study. *Neuroepidemiology.* 2013; 40(2): 109-116.
- Baan CA, Stolk RP, Grobbee DE, Witteman JC, Feskens EJ. Physical activity in elderly subjects with impaired glucose tolerance and newly diagnosed diabetes mellitus. *Am J Epidemiol.* 1999; 149(3): 219-27.
- Bardia A, Hartmann LC, Vachon CM, Vierkant RA, Wang AH, Olson JE, Sellers TA, Cerhan JR. Recreational physical activity and risk of postmenopausal breast cancer based on hormone receptor status. *Arch Intern Med.* 2006; 166(22): 2478-83.
- Batty GD, Shipley MJ, Marmot M, Smith GD. Physical activity and cause-specific mortality in men with Type 2 diabetes/impaired glucose tolerance: evidence from the Whitehall study. *Diabet Med.* 2002; 19(7): 580-8.
- Bijnen FC, Caspersen CJ, Feskens EJ, Saris WH, Mosterd WL, Kromhout D. Physical activity and 10-year mortality from cardiovascular diseases and all causes: The Zutphen Elderly Study. *Arch Intern Med.* 1998; 158(14): 1499-505.
- Bonora E, Kiechl S, Willeit J, Oberhollenzer F, Egger G, Meigs JB, Bonadonna RC, Muggeo M. Population-based incidence rates and risk factors for type 2 diabetes in white individuals: the Bruneck study. *Diabetes.* 2004;53(7):1782-9.
- Borch KB, Lund E, Braaten T, Weiderpass E. Physical activity and the risk of postmenopausal breast cancer - the Norwegian Women and Cancer Study. *J Negat Results Biomed.* 2014; 13: 3.
- Bostick RM, Potter JD, Kushi LH, Sellers TA, Steinmetz KA, McKenzie DR, Gapstur SM, Folsom AR. Sugar, meat, and fat intake, and non-dietary risk factors for colon cancer incidence in Iowa women (United States). *Cancer Causes Control.* 1994; 5(1): 38-52.
- Breslow RA, Ballard-Barbash R, Munoz K, Graubard BI. Long-term recreational physical activity and breast cancer in the National Health and Nutrition Examination Survey I epidemiologic follow-up study. *Cancer Epidemiol Biomarkers Prev.* 2001; 10(7): 805-8.

Burchfiel CM, Sharp DS, Curb JD, Rodriguez BL, Hwang LJ, Marcus EB, Yano K. Physical activity and incidence of diabetes: the Honolulu Heart Program. *Am J Epidemiol*. 1995;141(4): 360–8.

Calling S, Hedblad B, Engström G, Berglund G, Janzon L. Effects of body fatness and physical activity on cardiovascular risk: risk prediction using the bioelectrical impedance method. *Scandinavian journal of public Health*. 2006 Dec 1;34(6):568-75.

Calton BA, Lacey JV Jr, Schatzkin A, Schairer C, Colbert LH, Albanes D, Leitzmann MF. Physical activity and the risk of colon cancer among women: a prospective cohort study (United States). *Int J Cancer*. 2006; 119(2): 385-91.

Carlsson S, Ahlbom A, Lichtenstein P, Andersson T. Shared genetic influence of BMI, physical activity and type 2 diabetes: a twin study. *Diabetologia*. 2013; 56(5): 1031-5.

Carlsson S, Midthjell K, Tesfamariam MY, Grill V. Age, overweight and physical inactivity increase the risk of latent autoimmune diabetes in adults: results from the Nord-Trondelag health study. *Diabetologia*. 2007;50(1):55–8.

Cerhan JR, Chiu BC, Wallace RB, Lemke JH, Lynch CF, Torner JC, Rubenstein LM. Physical activity, physical function, and the risk of breast cancer in a prospective study among elderly women. *J Gerontol A Biol Sci Med Sci*. 1998; 53(4): M251-256.

Chang S-C, Ziegler RG, Dunn B, Stolzenberg-Solomon R, Lacey JV Jr, Huang W-Y, Schatzkin A, Reding D, Hoover RN, Hartge P, Leitzmann MF. Association of energy intake and energy balance with postmenopausal breast cancer in the prostate, lung, colorectal, and ovarian cancer screening trial. *Cancer Epidemiol Biomarkers Prev*. 2006; 15(2): 334-41.

Chao A, Connell CJ, Jacobs EJ, McCullough ML, Patel AV, Calle EE, Cokkinides VE, Thun MJ. Amount, type, and timing of recreational physical activity in relation to colon and rectal cancer in older adults: the Cancer Prevention Study II Nutrition Cohort. *Cancer Epidemiol Biomarkers Prev*. 2004; 13(12): 2187-95.

Chen J, Millar WJ. Health effects of physical activity. *Health Rep*. 1999; 11(1): 21-31.

Chien KL, Chen MF, Hsu HC, Su TC, Lee YT. Sports activity and risk of type 2 diabetes in Chinese. *Diabetes Res Clin Pract*. 2009;84(3):311–8.

Chiuve SE, McCullough ML, Sacks FM, Rimm EB. Healthy lifestyle factors in the primary prevention of coronary heart disease among men: benefits among users and nonusers of lipid-lowering and antihypertensive medications. *Circulation*. 2006; 114(2): 160-7.

Chiuve SE, Rexrode KM, Spiegelman D, Logroscino G, Manson JE, Rimm EB. Primary prevention of stroke by healthy lifestyle. *Circulation*. 2008; 118(9): 947-954.

Chomistek AK, Manson JE, Stefanick ML, Lu B, Sands-Lincoln M, Going SB, Garcia L, Allison MA, Sims ST, LaMonte MJ, Johnson KC, Eaton CB. Relationship of sedentary behavior and physical activity to incident cardiovascular disease: results from the Women’s Health Initiative. *J Am Coll Cardiol*. 2013; 61(23): 2346-54.

Colbert LH, Hartman TJ, Malila N, Limburg PJ, Pietinen P, Virtamo J, Taylor PR, Albanes D. Physical activity in relation to cancer of the colon and rectum in a cohort of male smokers. *Cancer Epidemiol Biomarkers Prev*. 2001; 10(3): 265-8.

Colditz GA, Feskanich D, Chen WY, Hunter DJ, Willett WC. Physical activity and risk of breast cancer in premenopausal women. *Br J Cancer*. 2003; 89(5): 847-51.

Dallal CM, Sullivan-Halley J, Ross RK, Wang Y, Deapen D, Horn-Ross PL, Reynolds P, Stram DO, Clarke CA, Anton-Culver H, Ziogas A, Peel D, West DW, Wright W, Bernstein L. Long-term recreational physical activity and risk of invasive and in situ breast cancer: the California teachers study. *Arch Intern Med*. 2007; 167(4): 408-15.

- Demakakos P, Hamer M, Stamatakis E, Steptoe A. Low-intensity physical activity is associated with reduced risk of incident type 2 diabetes in older adults: evidence from the English Longitudinal Study of Ageing. *Diabetologia*. 2010; 53(9): 1877-1885.
- Donahue, R. P., Abbott, R. D., Reed, D. M., & Yano, K. (1988). Physical activity and coronary heart disease in middle-aged and elderly men: the Honolulu Heart Program. *American Journal of Public Health*, 78(6), 683-685.
- Doi Y, Ninomiya T, Hata J, Hirakawa Y, Mukai N, Iwase M, Kiyohara Y. Two risk score models for predicting incident type 2 diabetes in Japan. *Diabet Med*. 2012;29(1):107–14.
- Dorgan JF, Brown C, Barrett M, Splansky GL, Kreger BE, D'Agostino RB, Albanes D, Schatzkin A. Physical activity and risk of breast cancer in the Framingham Heart Study. *Am J Epidemiol*. 1994; 139(7): 662-9.
- Dotevall A, Johansson S, Wilhelmsen L, Rosengren A. Increased levels of triglycerides, BMI and blood pressure and low physical activity increase the risk of diabetes in Swedish women. A prospective 18-year follow-up of the BEDA study. *Diabet Med*. 2004;21(6):615–22.
- Eaton CB, Medalie JH, Flocke SA, Zyzanski SJ, Yaari S, Goldbourt U. Self-reported physical activity predicts long-term coronary heart disease and all-cause mortalities. Twenty-one-year follow-up of the Israeli Ischemic Heart Disease Study. *Arch Fam Med*. 1995; 4(4): 323-9.
- Eliassen AH, Hankinson SE, Rosner B, Holmes MD, Willett WC. Physical activity and risk of breast cancer among postmenopausal women. *Arch Intern Med*. 2010; 170(19): 1758-64.
- Ellekjaer H, Holmen J, Ellekjaer E, Vatten L. Physical activity and stroke mortality in women. Ten-year follow-up of the Nord-Trøndelag health survey, 1984-1986. *Stroke*. 2000; 31(1): 14-8.
- Elwood P, Galante J, Pickering J, Palmer S, Bayer A, Ben-Shlomo Y, Longley M, Gallacher J. Healthy lifestyles reduce the incidence of chronic diseases and dementia: evidence from the caerphilly cohort study. *PLoS ONE*. 2013;8(12):e81877.
- Fan S, Chen J, Huang J, Li Y, Zhao L, Liu X, Li J, Cao J, Yu L, Deng Y, Chen N, Guo D, et al. Physical activity level and incident type 2 diabetes among Chinese adults. *Med Sci Sports Exerc*. 2015;47(4):751–6.
- Folsom AR, Arnett DK, Hutchinson RG, Liao F, Clegg LX, Cooper LS. Physical activity and incidence of coronary heart disease in middle-aged women and men. *Med Sci Sports Exerc*. 1997; 29(7): 901-9.
- Folsom AR, Kushi LH, Hong CP. Physical activity and incident diabetes mellitus in postmenopausal women. *Am J Public Health*. 2000; 90(1): 134-8.
- Fraser G, Pearce N. Occupational physical activity and risk of cancer of the colon and rectum in New Zealand males. *Cancer Causes Control*. 1993; 4(1): 45-50.
- Fretts AM, Howard BV, Kriska AM, Smith NL, Lumley T, Lee ET, Russell M, Siscovick D. Physical activity and incident diabetes in American Indians: the Strong Heart Study. *Am J Epidemiol*. 2009;170(5):632–9.
- Friedenreich C, Norat T, Steindorf K, Boutron-Ruault M-C, Pischon T, Mazuir M, Clavel-Chapelon F, Linseisen J, Boeing H, Bergman M, Johnsen NF, Tjønneland A, Overvad K, Mendez M, Quirós JR, Martínez C, Dorronsoro M, Navarro C, Gurrea AB, Bingham S, Khaw K-T, Allen N, Key T, Trichopoulou A, Trichopoulos D, Orfanou N, Krogh V, Palli D, Tumino R, Panico S, Vineis P, Bueno-de-Mesquita HB, Peeters PHM, Monninkhof E, Berglund G, Manjer J, Ferrari P, Slimani N, Kaaks R, Riboli E.

Physical activity and risk of colon and rectal cancers: the European prospective investigation into cancer and nutrition. *Cancer Epidemiol Biomarkers Prev.* 2006; 15(12): 2398-407.

Frisch RE, Wyshak G, Witschi J, Albright NL, Albright TE, Schiff I. Lower lifetime occurrence of breast cancer and cancers of the reproductive system among former college athletes. *Int J Fertil.* 1987; 32(3): 217-25.

Gerhardsson M, Norell SE, Kiviranta H, Pedersen NL, Ahlbom A. Sedentary jobs and colon cancer. *Am J Epidemiol.* 1986; 123(5): 775-80.

Giovannucci E, Ascherio A, Rimm EB, Colditz GA, Stampfer MJ, Willett WC. Physical activity, obesity, and risk for colon cancer and adenoma in men. *Ann Intern Med.* 1995; 122(5): 327-34.

Grontved A, Pan A, Mekary RA, Stampfer M, Willett WC, Manson JE, Hu FB. Muscle-strengthening and conditioning activities and risk of type 2 diabetes: a prospective study in two cohorts of US women. *PLoS Med.* 2014;11(1):e1001587.

Grontved A, Rimm EB, Willett WC, Andersen LB, Hu FB. A prospective study of weight training and risk of type 2 diabetes mellitus in men. *Arch Intern Med.* 2012;172(17):1306-12.

Gulsvik AK, Thelle DS, Samuelsen SO, Myrstad M, Mowé M, Wyller TB. Ageing, physical activity and mortality—a 42-year follow-up study. *International journal of epidemiology.* 2012 Apr 1;41(2):521-30.

Gurwitz JH, Field TS, Glynn RJ, Manson JE, Avorn J, Taylor JO, Hennekens CH. Risk factors for non-insulin-dependent diabetes mellitus requiring treatment in the elderly. *J Am Geriatr Soc.* 1994; 42(12): 1235-40.

Haapanen N, Miilunpalo S, Vuori I, Oja P, Pasanen M. Association of leisure time physical activity with the risk of coronary heart disease, hypertension and diabetes in middle-aged men and women. *Int J Epidemiol.* 1997; 26(4): 739-47.

Harari G, Green MS, Zelber-Sagi S. Combined association of occupational and leisure-time physical activity with all-cause and coronary heart disease mortality among a cohort of men followed-up for 22 years. *Occupational and environmental medicine.* 2015 Mar 24:oemed-2014.

Hastert TA, Beresford SA, Patterson RE, Kristal AR, White E. Adherence to WCRF/AICR cancer prevention recommendations and risk of post-menopausal breast cancer. *Cancer Epidemiology Biomarkers & Prevention.* 2013 Jun 18:cebp-0210.

Helmrich SP, Ragland DR, Paffenbarger RS Jr. Prevention of non-insulin-dependent diabetes mellitus with physical activity. *Med Sci Sports Exerc.* 1994; 26(7): 824-30.

Hildebrand JS, Gapstur SM, Campbell PT, Gaudet MM, Patel AV. Recreational physical activity and leisure-time sitting in relation to postmenopausal breast cancer risk. *Cancer Epidemiol Biomarkers Prev.* 2013; 22(10): 1906-1912.

Hillsdon M, Thorogood M, Murphy M, Jones L. Can a simple measure of vigorous physical activity predict future mortality? Results from the OXCHECK study. *Public Health Nutr.* 2004; 7(4): 557-62.

Holme I, Tonstad S, Sogaard AJ, Larsen PG, Haheim LL. Leisure time physical activity in middle age predicts the metabolic syndrome in old age: results of a 28-year follow-up of men in the Oslo study. *BMC Public Health.* 2007;7:154.

Holtermann A, Mortensen OS, Sjøgaard K, Gyntelberg F, Suadicani P. Risk factors for ischaemic heart disease mortality among men with different occupational physical demands. A 30-year prospective cohort study. *BMJ open*. 2012 Jan 1;2(1):e000279.

Howard RA, Freedman DM, Park Y, Hollenbeck A, Schatzkin A, Leitzmann MF. Physical activity, sedentary behavior, and the risk of colon and rectal cancer in the NIH-AARP Diet and Health Study. *Cancer Causes Control*. 2008; 19(9): 939-53.

Howard RA, Leitzmann MF, Linet MS, Freedman DM. Physical activity and breast cancer risk among pre- and postmenopausal women in the U.S. Radiologic Technologists cohort. *Cancer Causes Control*. 2009; 20(3): 323-33.

Hsia J, Wu L, Allen C, Oberman A, Lawson WE, Torrens J, Safford M, Limacher MC, Howard BV, Women's Health Initiative Research Group. Physical activity and diabetes risk in postmenopausal women. *Am J Prev Med*. 2005; 28(1): 19-25.

Hu FB, Leitzmann MF, Stampfer MJ, Colditz GA, Willett WC, Rimm EB. Physical activity and television watching in relation to risk for type 2 diabetes mellitus in men. *Arch Intern Med*. 2001; 161(12): 1542-8.

Hu FB, Sigal RJ, Rich-Edwards JW, Colditz GA, Solomon CG, Willett WC, Speizer FE, Manson JE. Walking compared with vigorous physical activity and risk of type 2 diabetes in women: a prospective study. *JAMA*. 1999; 282(15): 1433-9.

Hu FB, Stampfer MJ, Colditz GA, Ascherio A, Rexrode KM, Willett WC, Manson JE. Physical activity and risk of stroke in women. *JAMA*. 2000; 283(22): 2961-7.

Hu G, Jousilahti P, Borodulin K, Barengo NC, Lakka TA, Nissinen A, Tuomilehto J. Occupational, commuting and leisure-time physical activity in relation to coronary heart disease among middle-aged Finnish men and women. *Atherosclerosis*. 2007; 194(2): 490-7.

Hu G, Qiao Q, Silventoinen K, Eriksson JG, Jousilahti P, Lindström J, Valle TT, Nissinen A, Tuomilehto J. Occupational, commuting, and leisure-time physical activity in relation to risk for Type 2 diabetes in middle-aged Finnish men and women. *Diabetologia*. 2003; 46(3): 322-9.

Hu G, Sarti C, Jousilahti P, Silventoinen K, Barengo NC, Tuomilehto J. Leisure time, occupational, and commuting physical activity and the risk of stroke. *Stroke*. 2005; 36(9): 1994-9.

Håheim LL, Holme I, Hjerermann I, Leren P. Risk factors of stroke incidence and mortality. A 12-year follow-up of the Oslo Study. *Stroke*. 1993; 24(10): 1484-9.

Inoue M, Iso H, Yamamoto S, Kurahashi N, Iwasaki M, Sasazuki S, Tsugane S, Japan Public Health Center-Based Prospective Study Group. Daily total physical activity level and premature death in men and women: results from a large-scale population-based cohort study in Japan (JPHC study). *Ann Epidemiol*. 2008; 18(7): 522-30.

James SA, Jamjoum L, Raghunathan TE, Strogatz DS, Furth ED, Khazanie PG. Physical activity and NIDDM in African-Americans. The Pitt County Study. *Diabetes Care*. 1998; 21(4): 555-62.

Jefferis BJ, Whincup PH, Lennon LT, Papacosta O, Goya Wannamethee S. Physical Activity in Older Men: Longitudinal Associations with Inflammatory and Hemostatic Biomarkers, N-Terminal Pro-Brain Natriuretic Peptide, and Onset of Coronary Heart Disease and Mortality. *Journal of the American Geriatrics Society*. 2014 Apr 1;62(4):599-606.

Jefferis BJ, Whincup PH, Lennon L, Wannamethee SG. Longitudinal associations between changes in physical activity and onset of type 2 diabetes in older British men: the influence of adiposity. *Diabetes Care*. 2012;35(9):1876-83.

- Joseph J, Svartberg J, Njolstad I, Schirmer H. Incidence of and risk factors for type-2 diabetes in a general population: the Tromso Study. *Scand J Public Health*. 2010;38(7):768–75.
- Kaprio J, Kujala UM, Koskenvuo M, Sarna S. Physical activity and other risk factors in male twin-pairs discordant for coronary heart disease. *Atherosclerosis*. 2000; 150(1): 193-200.
- Krishnan S, Rosenberg L, Palmer JR. Physical activity and television watching in relation to risk of type 2 diabetes: the Black Women’s Health Study. *Am J Epidemiol*. 2009;169(4):428–34.
- Koloverou E, Panagiotakos DB, Pitsavos C, Chrysohoou C, Georgousopoulou EN, Pitaraki E, Metaxa V, Stefanadis C. 10-year incidence of diabetes and associated risk factors in Greece: the ATTICA study (2002–2012). *Rev Diabet Stud*. 2014;11(2):181–9.
- Laaksonen MA, Knekt P, Rissanen H, Harkanen T, Virtala E, Marniemi J, Aromaa A, Heliövaara M, Reunanen A. The relative importance of modifiable potential risk factors of type 2 diabetes: a meta-analysis of two cohorts. *Eur J Epidemiol*. 2010;25(2):115–24.
- Lakka TA, Venäläinen JM, Rauramaa R, Salonen R, Tuomilehto J, Salonen JT. Relation of leisure-time physical activity and cardiorespiratory fitness to the risk of acute myocardial infarction. *N Engl J Med*. 1994; 330(22): 1549-54.
- Lapidus L, Bengtsson C. Socioeconomic factors and physical activity in relation to cardiovascular disease and death. A 12 year follow up of participants in a population study of women in Gothenburg, Sweden. *Br Heart J*. 1986; 55(3): 295-301.
- Larsson SC, Rutegård J, Bergkvist L, Wolk A. Physical activity, obesity, and risk of colon and rectal cancer in a cohort of Swedish men. *Eur J Cancer*. 2006; 42(15): 2590-7.
- Lee D, Park I, Jun TW, Nam BH, Cho S, Blair SN, Kim YS. Physical activity and body mass index and their associations with the development of type 2 diabetes in Korean men. *Am J Epidemiol*. 2012; 176(1): 43-51.
- Lee IM, Hennekens CH, Berger K, Buring JE, Manson JE. Exercise and risk of stroke in male physicians. *Stroke*. 1999; 30(1): 1-6.
- Lee IM, Manson JE, Ajani U, Paffenbarger RS Jr, Hennekens CH, Buring JE. Physical activity and risk of colon cancer: the Physicians' Health Study (United States). *Cancer Causes Control*. 1997; 8(4): 568-74.
- Lee IM, Paffenbarger RS Jr. Physical activity and its relation to cancer risk: a prospective study of college alumni. *Med Sci Sports Exerc*. 1994; 26(7): 831-7.
- Lee IM, Paffenbarger RS Jr. Physical activity and stroke incidence: the Harvard Alumni Health Study. *Stroke*. 1998; 29(10): 2049-54.
- Lee IM, Rexrode KM, Cook NR, Hennekens CH, Burin JE. Physical activity and breast cancer risk: the Women's Health Study (United States). *Cancer Causes Control*. 2001; 12(2): 137-45.
- Lee K-J, Inoue M, Otani T, Iwasaki M, Sasazuki S, Tsugane S, JPHC Study Group. Physical activity and risk of colorectal cancer in Japanese men and women: the Japan Public Health Center-based prospective study. *Cancer Causes Control*. 2007; 18(2): 199-209.
- Leitzmann MF, Moore SC, Peters TM, Lacey JV Jr, Schatzkin A, Schairer C, Brinton LA, Albanes D. Prospective study of physical activity and risk of postmenopausal breast cancer. *Breast Cancer Res*. 2008; 10(5): R92.



- Leon AS, Myers MJ, Connett J. Leisure time physical activity and the 16-year risks of mortality from coronary heart disease and all-causes in the Multiple Risk Factor Intervention Trial (MRFIT). *Int J Sports Med.* 1997; S208-215.
- Li TY, Rana JS, Manson JE, Willett WC, Stampfer MJ, Colditz GA, Rexrode KM, Hu FB. Obesity as compared with physical activity in predicting risk of coronary heart disease in women. *Circulation.* 2006; 113(4): 499-506.
- Lindström E, Boysen G, Nyboe J. Lifestyle factors and risk of cerebrovascular disease in women. The Copenhagen City Heart Study. *Stroke.* 1993; 24(10): 1468-72.
- Longo-Mbenza B, On'Kin JK, Okwe AN, Kabangu NK, Fuele SM. Metabolic syndrome, aging, physical inactivity, and incidence of type 2 diabetes in general African population. *Diabetes and Vascular Disease Research.* 2009 Oct 28.
- Lucke J, Waters B, Hockey R, Spallek M, Gibson R, Byles J, Dobson A. Trends in women's risk factors and chronic conditions: findings from the Australian Longitudinal Study on Women's Health. *Womens Health (Lond Engl).* 2007;3(4):423-32.
- Luoto R, Latikka P, Pukkala E, Hakulinen T, Vihko V. The effect of physical activity on breast cancer risk: a cohort study of 30,548 women. *Eur J Epidemiol.* 2000; 16(10): 973-80.
- Magliano DJ, Barr EL, Zimmet PZ, Cameron AJ, Dunstan DW, Colagiuri S, Jolley D, Owen N, Phillips P, Tapp RJ, Welborn TA, Shaw JE. Glucose indices, health behaviors, and incidence of diabetes in Australia: the Australian diabetes, obesity and lifestyle study. *Diabetes Care.* 2008;31(2):267-72.
- Mai PL, Sullivan-Halley J, Ursin G, Stram DO, Deapen D, Villaluna D, Horn-Ross PL, Clarke CA, Reynolds P, Ross RK, West DW, Anton-Culver H, Ziogas A, Bernstein L. Physical activity and colon cancer risk among women in the California Teachers Study. *Cancer Epidemiol Biomarkers Prev.* 2007; 16(3): 517-25.
- Mannsværk J, Wilsgaard T, Mathiesen EB, Løchen ML, Rasmussen K, Thelle DS, Njølstad I, Hopstock LA, Børnaa KH. Trends in Modifiable Risk Factors are Associated With Declining Incidence of Hospitalized and Non-Hospitalized Acute Coronary Heart Disease in a Population. *Circulation.* 2015 Nov 18:CIRCULATIONAHA-115.
- Manson JE, Nathan DM, Krolewski AS, Stampfer MJ, Willett WC, Hennekens CH. A prospective study of exercise and incidence of diabetes among US male physicians. *JAMA.* 1992; 268(1): 63-7.
- Manson JE, Rimm EB, Stampfer MJ, Colditz GA, Willett WC, Krolewski AS, Rosner B, Hennekens CH, Speizer FE. Physical activity and incidence of non-insulin-dependent diabetes mellitus in women. *Lancet.* 1991; 338(8770): 774-8.
- Margolis KL, Mucci L, Braaten T, Kumle M, Trolle Lagerros Y, Adami H-O, Lund E, Weiderpass E. Physical activity in different periods of life and the risk of breast cancer: the Norwegian-Swedish Women's Lifestyle and Health cohort study. *Cancer Epidemiol Biomarkers Prev.* 2005; 14(1): 27-32.
- Maruti SS, Willett WC, Feskanich D, Rosner B, Colditz GA. A prospective study of age-specific physical activity and premenopausal breast cancer. *J Natl Cancer Inst.* 2008; 100(10): 728-37.
- McTiernan A, Kooperberg C, White E, Wilcox S, Coates R, Adams-Campbell LL, Woods N, Ockene J, Women's Health Initiative Cohort Study. Recreational physical activity and the risk of breast cancer in postmenopausal women: the Women's Health Initiative Cohort Study. *JAMA.* 2003; 290(10): 1331-6.
- Meisinger C, Löwel H, Heier M, Kandler U, Döring A. Association of sports activities in leisure time and incident myocardial infarction in middle-aged men and women from the general population: the MONICA/KORA Augsburg cohort study. *Eur J Cardiovasc Prev Rehabil.* 2007; 14(6): 788-92.

Meisinger C, Löwel H, Thorand B, Döring A. Leisure time physical activity and the risk of type 2 diabetes in men and women from the general population. *Diabetologia*. 2005; 48(1): 27-34.

Menotti A, Puddu PE, Maiani G, Catasta G. Lifestyle behaviour and lifetime incidence of heart diseases. *International journal of cardiology*. 2015 Dec 15;201:293-9.

Mertens AJ, Sweeney C, Shahar E, Rosamond WD, Folsom AR. Physical activity and breast cancer incidence in middle-aged women: a prospective cohort study. *Breast Cancer Res Treat*. 2006; 97(2): 209-14.

Moradi T, Adami H-O, Ekblom A, Wedrén S, Terry P, Floderus B, Lichtenstein P. Physical activity and risk for breast cancer a prospective cohort study among Swedish twins. *Int J Cancer*. 2002; 100(1): 76-81.

Moradi T, Adami HO, Bergström R, Gridley G, Wolk A, Gerhardsson M, Dosemeci M, Nyrén O. Occupational physical activity and risk for breast cancer in a nationwide cohort study in Sweden. *Cancer Causes Control*. 1999; 10(5): 423-30.

Moradi T, Gridley G, Björk J, Dosemeci M, Ji B-T, Berkel HJ, Lemeshow S. Occupational physical activity and risk for cancer of the colon and rectum in Sweden among men and women by anatomic subsite. *Eur J Cancer Prev*. 2008; 17(3): 201-8.

Morris JN, Clayton DG, Everitt MG, Semmence AM, Burgess EH. Exercise in leisure time: coronary attack and death rates. *Br Heart J*. 1990; 63(6): 325-34.

Mozaffarian D, Kamineni A, Carnethon M, Djouss L, Mukamal KJ, Siscovick D. Lifestyle risk factors and new-onset diabetes mellitus in older adults: the cardiovascular health study. *Arch Intern Med*. 2009; 169(8): 798-807.

Myint PK, Luben RN, Wareham NJ, Welch AA, Bingham SA, Day NE, Khaw K-T. Combined work and leisure physical activity and risk of stroke in men and women in the European prospective investigation into Cancer-Norfolk Prospective Population Study. *Neuroepidemiology*. 2006; 27(3): 122-129.

Nilsen TIL, Romundstad PR, Petersen H, Gunnell D, Vatten LJ. Recreational physical activity and cancer risk in subsites of the colon (the Nord-Trøndelag Health Study). *Cancer Epidemiol Biomarkers Prev*. 2008; 17(1): 183-8.

Okada H, Horibe H, Yoshiyuki O, Hayakawa N, Aoki N. A prospective study of cerebrovascular disease in Japanese rural communities, Akabane and Asahi. Part 1: evaluation of risk factors in the occurrence of cerebral hemorrhage and thrombosis. *Stroke*. 1976; 7(6): 599-607.

Okada K, Hayashi T, Tsumura K, Suematsu C, Endo G, Fujii S. Leisure-time physical activity at weekends and the risk of Type 2 diabetes mellitus in Japanese men: the Osaka Health Survey. *Diabet Med*. 2000; 17(1): 53-8.

Paffenbarger RS Jr, Brand RJ, Sholtz RI, Jung DL. Energy expenditure, cigarette smoking, and blood pressure level as related to death from specific diseases. *Am J Epidemiol*. 1978; 108(1): 12-8.

Paffenbarger RS Jr, Wing AL, Hyde RT. Physical activity as an index of heart attack risk in college alumni. *Am J Epidemiol*. 1978; 108(3): 161-75.

Paganini-Hill A, Perez Barreto M. Stroke risk in older men and women: aspirin, estrogen, exercise, vitamins, and other factors. *J Gend Specif Med*. 2001; 4(2): 18-28.

Panagiotakos DB, Pitsavos C, Skoumas Y, Lentzas Y, Stefanadis C. Five-year incidence of type 2 diabetes mellitus among cardiovascular disease-free Greek adults: findings from the ATTICA study. *Vasc Health Risk Manag*. 2008; 4(3): 691-8.

Pedersen JØ, Heitmann BL, Schnohr P, Grønbaek M. The combined influence of leisure-time physical activity and weekly alcohol intake on fatal ischaemic heart disease and all-cause mortality. *Eur Heart J*. 2008; 29(2): 204-12.

Peters TM, Schatzkin A, Gierach GL, Moore SC, Lacey JV Jr, Wareham NJ, Ekelund U, Hollenbeck AR, Leitzmann MF. Physical activity and postmenopausal breast cancer risk in the NIH-AARP diet and health study. *Cancer Epidemiol Biomarkers Prev*. 2009; 18(1): 289-96.

Pronk A, Ji B-T, Shu X-O, Chow W-H, Xue S, Yang G, Li H-L, Rothman N, Gao Y-T, Zheng W, Matthews CE. Physical activity and breast cancer risk in Chinese women. *Br J Cancer*. 2011; 105(9): 1443-50.

Qvist J, Johansson SE, Johansson LM. Multivariate analyses of mortality from coronary heart disease due to biological and behavioural factors. *Scand J Soc Med*. 1996; 24(1): 67-76.

Rathmann W, Strassburger K, Heier M, Holle R, Thorand B, Giani G, Meisinger C. Incidence of Type 2 diabetes in the elderly German population and the effect of clinical and lifestyle risk factors: KORA S4/F4 cohort study. *Diabet Med*. 2009;26(12):1212-9.

Reis JP, Loria CM, Sorlie PD, Park Y, Hollenbeck A, Schatzkin A. Lifestyle factors and risk for new-onset diabetes: a population-based cohort study. *Ann Intern Med*. 2011;155(5):292-9.

Rintala P, Pukkala E, Läärä E, Vihko V. Physical activity and breast cancer risk among female physical education and language teachers: A 34-year follow-up. *Int J Cancer*. 2003;107(2):268-70.

Rintala PE, Pukkala E, Paakkulainen HT, Vihko VJ. Self-experienced physical workload and risk of breast cancer. *Scand J Work Environ Health*. 2002:158-62.

Rockhill B, Willett WC, Hunter DJ, Manson JE, Hankinson SE, Colditz GA. A prospective study of recreational physical activity and breast cancer risk. *Arch Intern Med*. 1999; 159(19): 2290-6.

Rosenberg L, Palmer JR, Bethea TN, Ban Y, Kipping-Ruane K, Adams-Campbell LL. A prospective study of physical activity and breast cancer incidence in African-American women. *Cancer Epidemiology Biomarkers & Prevention*. 2014 Nov 1;23(11):2522-31.

Rosengren A, Wilhelmsen L. Physical activity protects against coronary death and deaths from all causes in middle-aged men. Evidence from a 20-year follow-up of the primary prevention study in Göteborg. *Ann Epidemiol*. 1997; 7(1): 69-75.

Salonen JT, Puska P, Tuomilehto J. Physical activity and risk of myocardial infarction, cerebral stroke and death: a longitudinal study in Eastern Finland. *Am J Epidemiol*. 1982; 115(4): 526-37.

Sattelmair JR, Kurth T, Buring JE, Lee I-M. Physical activity and risk of stroke in women ;*Stroke*. 2010; 41(6): 1243-50.

Sesso HD, Paffenbarger RS Jr, Lee IM. Physical activity and breast cancer risk in the College Alumni Health Study (United States). *Cancer Causes Control*. 1998; 9(4): 433-9.

Sesso HD, Paffenbarger RS Jr, Lee IM. Physical activity and coronary heart disease in men: The Harvard Alumni Health Study. *Circulation*. 2000; 102(9): 975-80.

Severson RK, Nomura AM, Grove JS, Stemmermann GN. A prospective analysis of physical activity and cancer. *Am J Epidemiol*. 1989; 130(3): 522-9.

Shi L, Shu XO, Li H, Cai H, Liu Q, Zheng W, Xiang YB, Villegas R. Physical activity, smoking, and alcohol consumption in association with incidence of type 2 diabetes among middle-aged and elderly Chinese men. *PLoS One*. 2013; 8(11): e77919.

Siegel LC, Sesso HD, Bowman TS, Lee IM, Manson JE, Gaziano JM. Physical activity, body mass index, and diabetes risk in men: a prospective study. *The American journal of medicine*. 2009 Dec 31;122(12):1115-21.

Sieverdes JC, Sui X, Lee DC, Church TS, McClain A, Hand GA, Blair SN. Physical activity, cardiorespiratory fitness and the incidence of type 2 diabetes in a prospective study of men. *Br J Sports Med*. 2010;44(4):238-44.

Silvera SAN, Jain M, Howe GR, Miller AB, Rohan TE. Energy balance and breast cancer risk: a prospective cohort study. *Breast Cancer Res Treat*. 2006; 97(1): 97-106.

Simonsick EM, Lafferty ME, Phillips CL, Mendes de Leon CF, Kasl SV, Seeman TE, Fillenbaum G, Hebert P, Lemke JH. Risk due to inactivity in physically capable older adults. *Am J Public Health*. 1993; 83(10): 1443-50.

Slattery ML, Jacobs DR Jr, Nichaman MZ. Leisure time physical activity and coronary heart disease death. The US Railroad Study. *Circulation*. 1989; 79(2): 304-11.

Sobolski J, Kornitzer M, De Backer G, Dramaix M, Abramowicz M, Degre S, Denolin H. Protection against ischemic heart disease in the Belgian Physical Fitness Study: physical fitness rather than physical activity?. *Am J Epidemiol*. 1987; 125(4): 601-10.

Steenland K, Nowlin S, Palu S. Cancer incidence in the National Health and Nutrition Survey I. Follow-up data: diabetes, cholesterol, pulse and physical activity. *Cancer Epidemiol Biomarkers Prev*. 1995; 4(8): 807-11.

Steinbrecher A, Erber E, Grandinetti A, Nigg C, Kolonel LN, Maskarinec G. Physical activity and risk of type 2 diabetes among Native Hawaiians, Japanese Americans, and Caucasians: the Multiethnic Cohort. *J Phys Act Health*. 2012;9(5):634-41.

Steindorf K, Ritte R, Eomois P-P, Lukanova A, Tjonneland A, Johnsen NF, Overvad K, Østergaard JN, Clavel-Chapelon F, Fournier A, Dossus L, Teucher B, Rohrmann S, Boeing H, Wientzek A, Trichopoulou A, Karapetyan T, Trichopoulos D, Masala G, Berrino F, Mattiello A, Tumino R, Ricceri F, Quirós JR, Travier N, Sánchez M-J, Navarro C, Ardanaz E, Amiano P, Bueno-de-Mesquita HBA, van Duijnhoven F, Monninkhof E, May AM, Khaw K-T, Wareham N, Key TJ, Travis RC, Borch KB, Sund M, Andersson A, Fedirko V, Rinaldi S, Romieu I, Wahrendorf J, Riboli E, Kaaks R. Physical activity and risk of breast cancer overall and by hormone receptor status: the European prospective investigation into cancer and nutrition. *Int J Cancer*. 2013; 132(7): 1667-78.

Stringhini S, Tabak AG, Akbaraly TN, Sabia S, Shipley MJ, Marmot MG, Brunner EJ, Batty GD, Bovet P, Kivimaki M. Contribution of modifiable risk factors to social inequalities in type 2 diabetes: prospective Whitehall II cohort study. *BMJ*. 2012;345:e5452.

Sun F, Tao Q, Zhan S. An accurate risk score for estimation 5-year risk of type 2 diabetes based on a health screening population in Taiwan. *Diabetes Res Clin Pract*. 2009;85(2):228-34.

Sundquist K, Qvist J, Johansson S-E, Sundquist J. The long-term effect of physical activity on incidence of coronary heart disease: a 12-year follow-up study. *Prev Med*. 2005; 41(1): 219-25.

Suzuki R, Iwasaki M, Yamamoto S, Inoue M, Sasazuki S, Sawada N, Yamaji T, Shimazu T, Tsugane S, Japan Public Health Center-based Prospective Study Group. Leisure-time physical activity and breast cancer risk defined by estrogen and progesterone receptor status--the Japan Public Health Center-based Prospective Study. *Prev Med*. 2011; 52(3-4): 227-33.

Suzuki S, Kojima M, Tokudome S, Mori M, Sakauchi F, Fujino Y, Wakai K, Lin Y, Kikuchi S, Tamakoshi K, Yatsuya H, Tamakoshi A, Japan Collaborative Cohort Study Group. Effect of physical activity on breast cancer risk: findings of the Japan collaborative cohort study. *Cancer Epidemiol Biomarkers Prev*. 2008; 17(12): 3396-401.

Tamosiunas A, Luksiene D, Baceviciene M, Bernotiene G, Radisauskas R, Malinauskiene V, Kranciukaite-Butylkiniene D, Virviciute D, Peasey A, Bobak M. Health factors and risk of all-cause, cardiovascular, and coronary heart disease mortality: findings from the MONICA and HAPIEE studies in Lithuania. *PloS one*. 2014 Dec 5;9(12):e114283.

Tanasescu M, Leitzmann MF, Rimm EB, Willett WC, Stampfer MJ, Hu FB. Exercise type and intensity in relation to coronary heart disease in men. *JAMA*. 2002; 288(16): 1994-2000.

Thune I, Brenn T, Lund E, Gaard M. Physical activity and the risk of breast cancer. *N Engl J Med*. 1997; 336(18): 1269-75.

Thune I, Lund E. Physical activity and risk of colorectal cancer in men and women. *Br J Cancer*. 1996; 73(9): 1134-40.

Tsai AC, Lee SH. Determinants of new-onset diabetes in older adults—Results of a national cohort study. *Clinical Nutrition*. 2015 Oct 31;34(5):937-42.

Villegas R, Shu XO, Li H, Yang G, Matthews CE, Leitzmann M, Li Q, Cai H, Gao YT, Zheng W. Physical activity and the incidence of type 2 diabetes in the Shanghai women's health study. *Int J Epidemiol*. 2006; 35(6): 1553–62.

Wagner A, Simon C, Evans A, Ferrières J, Montaye M, Ducimetière P, Arveiler D. Physical activity and coronary event incidence in Northern Ireland and France: the Prospective Epidemiological Study of Myocardial Infarction (PRIME). *Circulation*. 2002; 105(19): 2247-52.

Waki K, Noda M, Sasaki S, Matsumura Y, Takahashi Y, Isogawa A, Ohashi Y, Kadowaki T, Tsugane S. Alcohol consumption and other risk factors for self-reported diabetes among middle-aged Japanese: a population-based prospective study in the JPHC study cohort I. *Diabet Med*. 2005;22(3):323–31.

Waller K, Kaprio J, Lehtovirta M, Silventoinen K, Koskenvuo M, Kujala UM. Leisure-time physical activity and type 2 diabetes during a 28 year follow-up in twins. *Diabetologia*. 2010; 53(12): 2531-7.

Wannamethee G, Shaper AG. Physical activity and stroke in British middle aged men. *BMJ*. 1992; 304(6827): 597-601.

Wannamethee SG, Shaper AG, Alberti KG. Physical activity, metabolic factors, and the incidence of coronary heart disease and type 2 diabetes. *Arch Intern Med*. 2000; 160(14): 2108-16.

Weinstein AR, Sesso HD, Lee I-M, Rexrode KM, Cook NR, Manson JE, Buring JE, Gaziano JM. The joint effects of physical activity and body mass index on coronary heart disease risk in women. *Arch Intern Med*. 2008; 168(8): 884-90.

Weinstein AR, Sesso HD, Lee IM, Cook NR, Manson JE, Buring JE, Gaziano JM. Relationship of physical activity vs body mass index with type 2 diabetes in women. *JAMA*. 2004; 292(10): 1188-94.

Weller I, Corey P. The impact of excluding non-leisure energy expenditure on the relation between physical activity and mortality in women. *Epidemiology*. 1998; 9(6): 632-5.

Willey JZ, Moon YP, Paik MC, Boden-Albala B, Sacco RL, Elkind MSV. Physical activity and risk of ischemic stroke in the Northern Manhattan Study. *Neurology*. 2009; 73(21): 1774-1779.

Williams PT, Thompson PD. Walking versus running for hypertension, cholesterol, and diabetes mellitus risk reduction. *Arterioscler Thromb Vasc Biol*. 2013;33(5):1085–91.

Wolin KY, Lee I-M, Colditz GA, Glynn RJ, Fuchs C, Giovannucci E. Leisure-time physical activity patterns and risk of colon cancer in women. *Int J Cancer*. 2007; 121(12): 2776-81.

Wyrwich KW, Wolinsky FD. Physical activity, disability, and the risk of hospitalization for breast cancer among older women. *J Gerontol A Biol Sci Med Sci.* 2000; 55(7): M418-421.

Wyshak G, Frisch RE. Breast cancer among former college athletes compared to non-athletes: a 15-year follow-up. *Br J Cancer.* 2000; 82(3): 726-30.

Xu F, Ware RS, Tse LA, Wang Y, Wang Z, Hong X, Chan EY, Dunstan DW, Owen N. Joint associations of physical activity and hypertension with the development of type 2 diabetes among urban men and women in Mainland China. *PloS one.* 2014 Feb 13;9(2):e88719.

Yu S, Yarnell JWG, Sweetnam PM, Murray L, Caerphilly study. What level of physical activity protects against premature cardiovascular death? The Caerphilly study. *Heart.* 2003; 89(5): 502-6.

Zhang Q, Zhou Y, Gao X, Wang C, Zhang S, Wang A, Li N, Bian L, Wu J, Jia Q, Wu S, Zhao X. Ideal cardiovascular health metrics and the risks of ischemic and intracerebral hemorrhagic stroke. *Stroke.* 2013; 44(9): 2451-2456

**Table F. Continuous dose-response relationships between physical activity and breast cancer, colon cancer, diabetes, ischemic heart disease, and ischemic stroke**

| Physical activity in MET-minutes per week | Pooled RRs (UI)     |                     |                     |                        |                     |
|-------------------------------------------|---------------------|---------------------|---------------------|------------------------|---------------------|
|                                           | Breast cancer       | Colon cancer        | Diabetes            | Ischemic heart disease | Ischemic stroke     |
| 0                                         | Reference           | Reference           | Reference           | Reference              | Reference           |
| 600                                       | 0.987(0.971, 1.003) | 0.978(0.940, 1.016) | 0.980(0.967, 0.996) | 0.909(0.857, 0.964)    | 0.910(0.831, 1.000) |
| 1,200                                     | 0.974(0.942, 1.005) | 0.956(0.880, 1.032) | 0.961(0.933, 0.992) | 0.819(0.714, 0.928)    | 0.819(0.662, 1.001) |
| 1,800                                     | 0.960(0.914, 1.008) | 0.933(0.820, 1.048) | 0.921(0.867, 0.985) | 0.807(0.739, 0.886)    | 0.802(0.701, 0.916) |
| 2,400                                     | 0.957(0.914, 1.001) | 0.883(0.806, 0.958) | 0.882(0.800, 0.977) | 0.796(0.711, 0.895)    | 0.785(0.643, 0.946) |
| 3,000                                     | 0.953(0.913, 0.994) | 0.833(0.759, 0.907) | 0.834(0.773, 0.904) | 0.776(0.712, 0.844)    | 0.784(0.701, 0.888) |
| 3,600                                     | 0.949(0.912, 0.990) | 0.831(0.760, 0.903) | 0.786(0.735, 0.841) | 0.756(0.692, 0.816)    | 0.783(0.695, 0.884) |
| 4,200                                     | 0.946(0.909, 0.985) | 0.829(0.761, 0.898) | 0.737(0.684, 0.794) | 0.736(0.651, 0.822)    | 0.782(0.643, 0.934) |
| 4,800                                     | 0.942(0.907, 0.982) | 0.827(0.761, 0.894) | 0.736(0.684, 0.792) | 0.736(0.653, 0.818)    | 0.780(0.644, 0.926) |
| 5,400                                     | 0.939(0.902, 0.979) | 0.825(0.762, 0.890) | 0.735(0.684, 0.790) | 0.735(0.654, 0.815)    | 0.777(0.646, 0.919) |
| 6,000                                     | 0.935(0.897, 0.979) | 0.824(0.762, 0.887) | 0.734(0.684, 0.786) | 0.734(0.655, 0.812)    | 0.774(0.648, 0.913) |
| 6,600                                     | 0.931(0.889, 0.978) | 0.822(0.762, 0.884) | 0.733(0.685, 0.785) | 0.734(0.656, 0.809)    | 0.771(0.650, 0.905) |
| 7,200                                     | 0.928(0.883, 0.978) | 0.820(0.762, 0.880) | 0.732(0.685, 0.782) | 0.733(0.658, 0.806)    | 0.768(0.651, 0.898) |
| 7,800                                     | 0.924(0.875, 0.979) | 0.818(0.761, 0.877) | 0.731(0.684, 0.780) | 0.733(0.660, 0.803)    | 0.765(0.650, 0.891) |
| 8,400                                     | 0.920(0.867, 0.979) | 0.816(0.760, 0.873) | 0.730(0.684, 0.779) | 0.732(0.662, 0.801)    | 0.762(0.650, 0.884) |
| 9,000                                     | 0.917(0.858, 0.979) | 0.815(0.758, 0.871) | 0.729(0.684, 0.777) | 0.731(0.664, 0.799)    | 0.759(0.651, 0.878) |
| 9,600                                     | 0.912(0.862, 0.970) | 0.813(0.758, 0.868) | 0.728(0.684, 0.776) | 0.731(0.666, 0.796)    | 0.756(0.651, 0.872) |
| 10,200                                    | 0.908(0.861, 0.961) | 0.811(0.758, 0.864) | 0.727(0.684, 0.774) | 0.730(0.667, 0.794)    | 0.753(0.652, 0.865) |
| 10,800                                    | 0.904(0.859, 0.952) | 0.809(0.757, 0.862) | 0.726(0.683, 0.772) | 0.730(0.669, 0.792)    | 0.750(0.653, 0.858) |
| 11,400                                    | 0.900(0.855, 0.948) | 0.807(0.756, 0.860) | 0.725(0.682, 0.771) | 0.729(0.670, 0.789)    | 0.747(0.653, 0.852) |
| 12,000                                    | 0.895(0.850, 0.946) | 0.805(0.754, 0.858) | 0.723(0.682, 0.771) | 0.728(0.671, 0.787)    | 0.744(0.651, 0.846) |
| 12,600                                    | 0.891(0.841, 0.946) | 0.804(0.753, 0.857) | 0.722(0.681, 0.768) | 0.728(0.670, 0.787)    | 0.741(0.650, 0.841) |
| 13,200                                    | 0.887(0.832, 0.949) | 0.802(0.751, 0.856) | 0.721(0.681, 0.767) | 0.727(0.670, 0.785)    | 0.738(0.649, 0.833) |
| 13,800                                    | 0.883(0.819, 0.950) | 0.800(0.750, 0.854) | 0.720(0.680, 0.765) | 0.727(0.670, 0.784)    | 0.735(0.649, 0.828) |
| 14,400                                    | 0.878(0.807, 0.952) | 0.798(0.748, 0.851) | 0.719(0.678, 0.764) | 0.726(0.671, 0.782)    | 0.732(0.647, 0.825) |
| 15,000                                    | 0.874(0.795, 0.957) | 0.796(0.746, 0.850) | 0.718(0.678, 0.762) | 0.725(0.670, 0.781)    | 0.729(0.644, 0.820) |
| 15,600                                    | 0.872(0.797, 0.952) | 0.795(0.744, 0.849) | 0.717(0.677, 0.761) | 0.725(0.671, 0.781)    | 0.727(0.642, 0.815) |
| 16,200                                    | 0.870(0.798, 0.946) | 0.793(0.741, 0.849) | 0.716(0.676, 0.760) | 0.724(0.671, 0.779)    | 0.724(0.639, 0.810) |
| 16,800                                    | 0.867(0.801, 0.941) | 0.791(0.739, 0.848) | 0.715(0.674, 0.759) | 0.724(0.669, 0.779)    | 0.721(0.637, 0.806) |
| 17,400                                    | 0.865(0.804, 0.934) | 0.789(0.736, 0.848) | 0.714(0.673, 0.759) | 0.723(0.669, 0.781)    | 0.718(0.635, 0.803) |
| 18,000                                    | 0.863(0.806, 0.927) | 0.787(0.733, 0.847) | 0.713(0.670, 0.759) | 0.722(0.668, 0.780)    | 0.715(0.632, 0.798) |
| 18,600                                    | 0.861(0.807, 0.919) | 0.786(0.729, 0.846) | 0.712(0.667, 0.759) | 0.722(0.667, 0.781)    | 0.712(0.630, 0.793) |
| 19,200                                    | 0.859(0.808, 0.914) | 0.784(0.726, 0.846) | 0.711(0.665, 0.758) | 0.721(0.666, 0.781)    | 0.709(0.625, 0.792) |
| 19,800                                    | 0.856(0.809, 0.910) | 0.782(0.723, 0.845) | 0.710(0.663, 0.758) | 0.721(0.665, 0.781)    | 0.706(0.622, 0.790) |
| 20,400                                    | 0.854(0.808, 0.907) | 0.780(0.720, 0.845) | 0.708(0.660, 0.759) | 0.720(0.664, 0.782)    | 0.703(0.619, 0.790) |

| Physical activity in MET-minutes per week | Pooled RRs (UI)     |                     |                     |                        |                     |
|-------------------------------------------|---------------------|---------------------|---------------------|------------------------|---------------------|
|                                           | Breast cancer       | Colon cancer        | Diabetes            | Ischemic heart disease | Ischemic stroke     |
| 21,000                                    | 0.852(0.809, 0.900) | 0.778(0.717, 0.846) | 0.707(0.658, 0.759) | 0.720(0.663, 0.782)    | 0.700(0.614, 0.787) |
| 21,600                                    | 0.850(0.808, 0.896) | 0.776(0.713, 0.846) | 0.706(0.656, 0.759) | 0.719(0.662, 0.782)    | 0.697(0.611, 0.787) |
| 22,200                                    | 0.847(0.805, 0.893) | 0.775(0.709, 0.847) | 0.705(0.653, 0.759) | 0.718(0.660, 0.783)    | 0.694(0.606, 0.787) |
| 22,800                                    | 0.845(0.804, 0.892) | 0.773(0.705, 0.848) | 0.704(0.651, 0.760) | 0.718(0.659, 0.784)    | 0.691(0.601, 0.785) |
| 23,400                                    | 0.843(0.801, 0.888) | 0.771(0.702, 0.849) | 0.703(0.650, 0.760) | 0.717(0.657, 0.786)    | 0.688(0.595, 0.783) |
| 24,000                                    | 0.841(0.797, 0.888) | 0.769(0.698, 0.849) | 0.702(0.648, 0.760) | 0.717(0.655, 0.787)    | 0.685(0.592, 0.781) |
| 24,600                                    | 0.838(0.793, 0.889) | 0.767(0.694, 0.850) | 0.701(0.645, 0.760) | 0.716(0.652, 0.788)    | 0.682(0.585, 0.779) |
| 25,200                                    | 0.836(0.788, 0.891) | 0.766(0.689, 0.850) | 0.700(0.643, 0.760) | 0.715(0.650, 0.790)    | 0.679(0.577, 0.779) |
| 25,800                                    | 0.834(0.784, 0.892) | 0.764(0.685, 0.850) | 0.699(0.640, 0.760) | 0.715(0.648, 0.791)    | 0.676(0.570, 0.777) |
| 26,400                                    | 0.832(0.779, 0.893) | 0.762(0.679, 0.851) | 0.698(0.637, 0.760) | 0.714(0.645, 0.792)    | 0.674(0.564, 0.778) |
| 27,000                                    | 0.830(0.773, 0.893) | 0.760(0.675, 0.853) | 0.697(0.634, 0.760) | 0.714(0.642, 0.794)    | 0.671(0.558, 0.779) |
| 27,600                                    | 0.827(0.769, 0.894) | 0.758(0.671, 0.854) | 0.696(0.631, 0.761) | 0.713(0.640, 0.797)    | 0.668(0.551, 0.781) |
| 28,200                                    | 0.825(0.765, 0.897) | 0.757(0.668, 0.856) | 0.695(0.627, 0.762) | 0.712(0.636, 0.798)    | 0.665(0.546, 0.782) |
| 28,800                                    | 0.823(0.759, 0.900) | 0.755(0.663, 0.857) | 0.693(0.624, 0.763) | 0.712(0.633, 0.800)    | 0.662(0.540, 0.783) |
| 29,400                                    | 0.821(0.752, 0.903) | 0.753(0.658, 0.857) | 0.692(0.621, 0.764) | 0.711(0.630, 0.801)    | 0.659(0.533, 0.785) |
| 30,000                                    | 0.818(0.745, 0.905) | 0.751(0.654, 0.856) | 0.691(0.618, 0.765) | 0.711(0.626, 0.802)    | 0.656(0.527, 0.788) |
| 30,600                                    | 0.816(0.738, 0.906) | 0.749(0.649, 0.858) | 0.690(0.614, 0.766) | 0.710(0.623, 0.803)    | 0.653(0.520, 0.789) |



**Table G. Sensitivity Analysis: relative risks for the associations between physical activity and breast cancer for studies that assessed physical activity quantitatively versus those that assessed it qualitatively**

| Physical activity in MET-minutes per week | Pooled RRs (UI)                                        |                                                       |
|-------------------------------------------|--------------------------------------------------------|-------------------------------------------------------|
|                                           | Studies that assessed physical activity quantitatively | Studies that assessed physical activity qualitatively |
| <600                                      | Reference                                              | Reference                                             |
| 600 – 3,999                               | 0.975(0.930, 1.024)                                    | 0.958(0.912, 1.006)                                   |
| 4,000 – 7,999                             | 0.948(0.896, 1.004)                                    | 0.930(0.870, 0.988)                                   |
| ≥ 8,000                                   | 0.871(0.821, 0.923)                                    | 0.858(0.805, 0.914)                                   |
